# Supplementary material for: Transcriptome Analysis Reveals New Insights into the Bacterial Wilt Resistance Mechanism Mediated by Silicon in Tomato
Source: MDPI journal article supplement (doi:10.3390/ijms20030761), 2019-02-11
Supplement: s1 [file s1]

# Transcriptome analysis reveals new insights into bacterial wilt resistance mechanism mediated by silicon in tomato

Nihao Jiang , Xueying Fan, Weipeng Lin , Guoping Wang and Kunzheng Cai

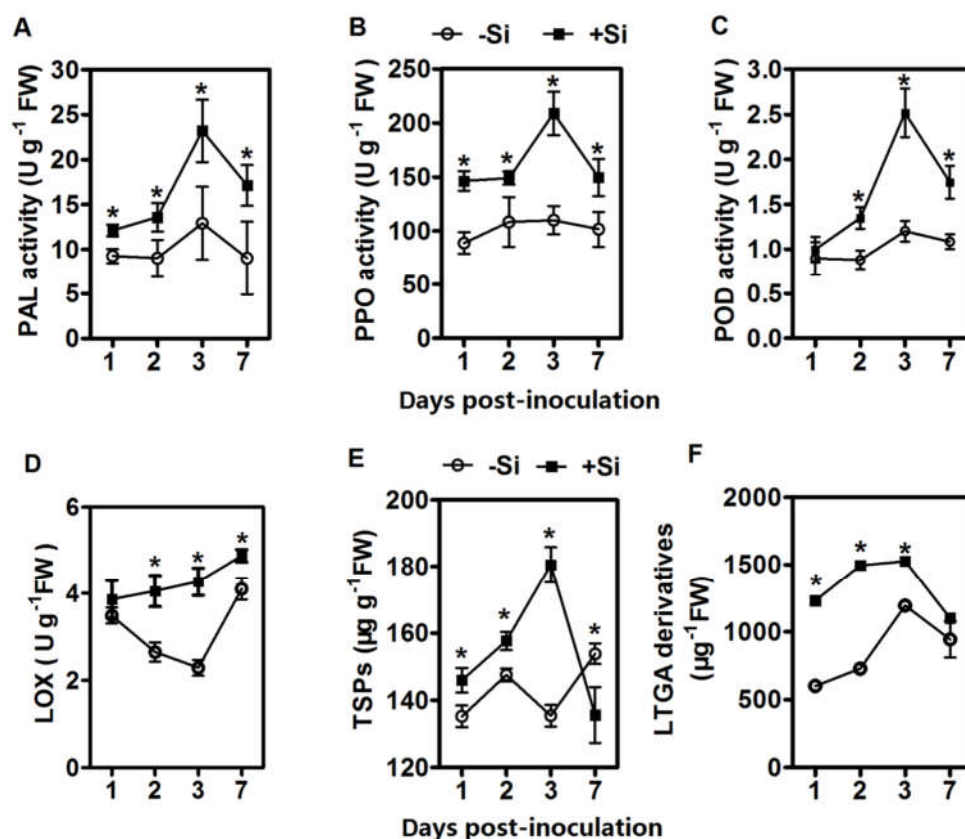

**Figure 1.** Effect of Si treatment on resistance related enzymes, total soluble phenols (TSPs) and lignin-thioglycolic acid (LTGA) derivatives in tomato root. Activities of PAL (A), POD (B), PPO (C), and LOX (D) in root tissue of Si-treated (+Si) and non-treated (-Si) tomato plants at different times after inoculation with *R. solanacearum*. Concentrations of TSPs (E) and LTGA derivatives (F) in tomato root were detected after pathogen infection. Data are means  $\pm$  SE of three replicate samples. Means followed by an asterisk are significantly different from untreated control at the same time-point (Student's *t*-test,  $p < 0.05$ ). FW = fresh weight.

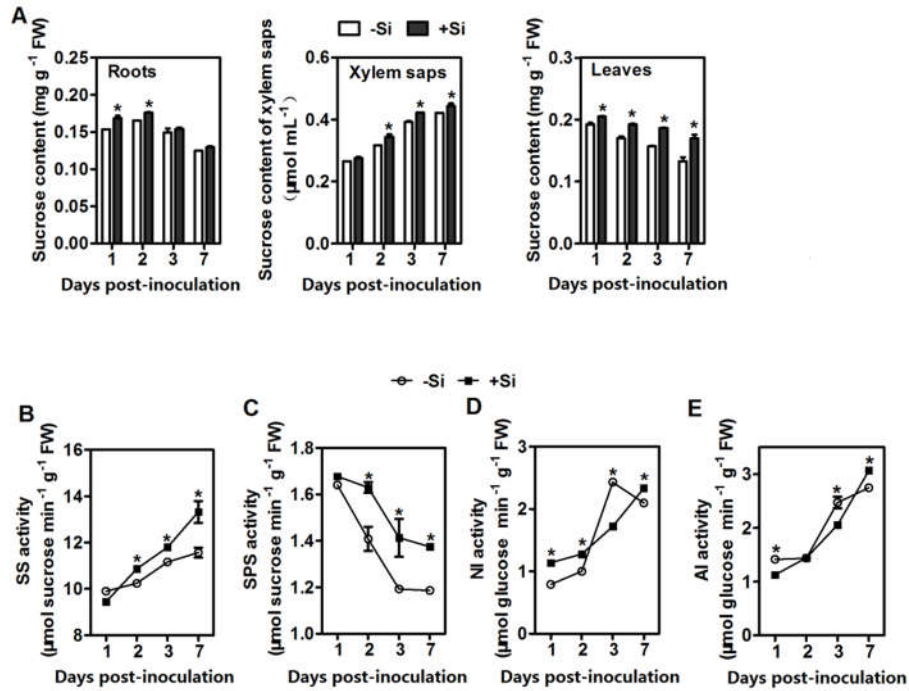

**Figure 2.** Effect of Si treatment on sucrose concentration and activities of enzymes related to sucrose metabolism in tomato at different time points after infection. **(A)** sucrose contents in roots, xylem saps and leaves of Si-treated (Si+) and untreated (Si-) tomato plants. The SS **(B)**, SPS **(C)**, NI **(D)** and AI **(E)** activities in leaf extracts in the same samples. AI, acid invertase; NI, neutral invertase; SS, sucrose synthase; SPS, sucrose-phosphate synthase. Values are the mean  $\pm$  SE of three replicate samples. Means followed by an asterisk are significantly different from untreated control at the same time-point (Student's *t*-test,  $p < 0.05$ ). FW = fresh weight.

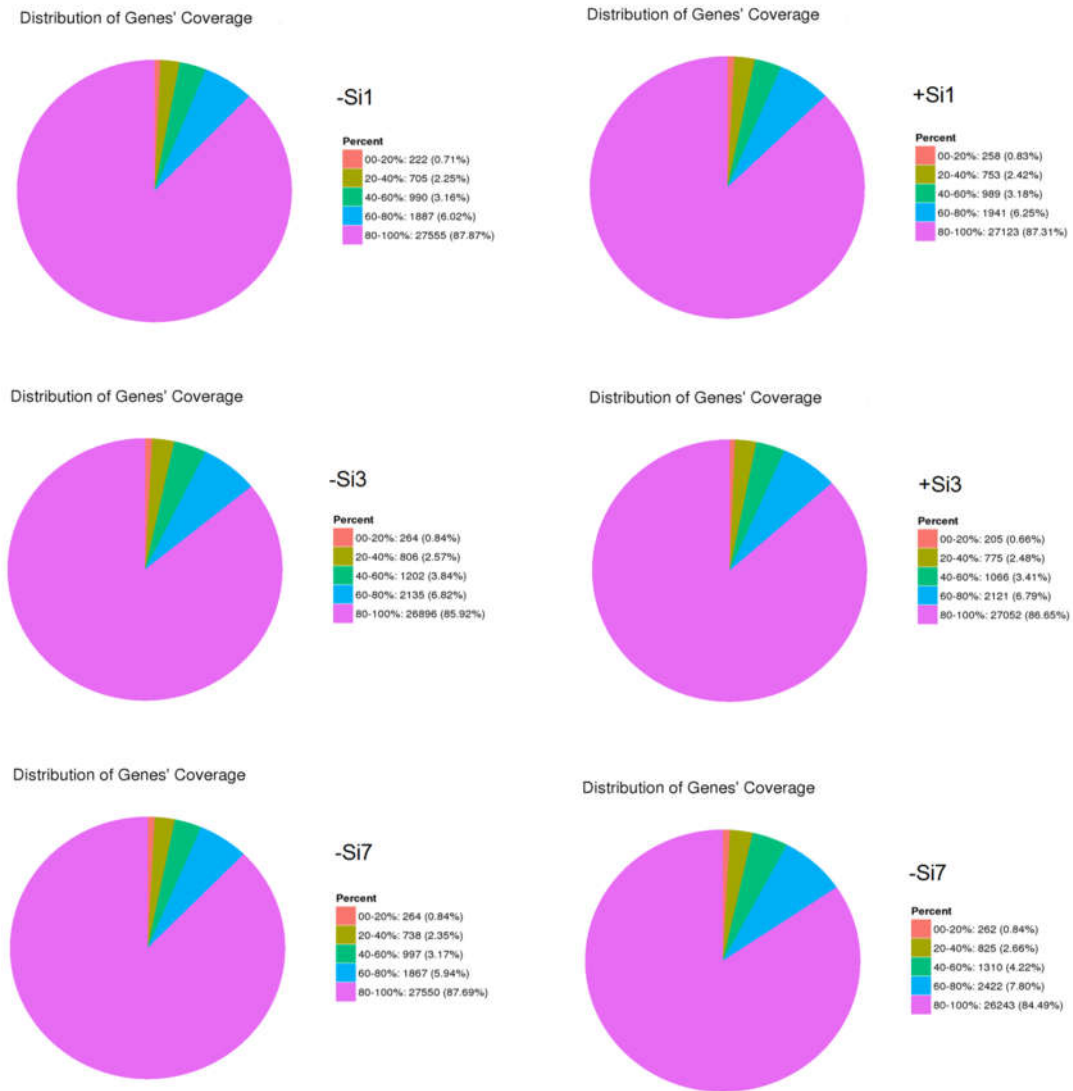

**Figure 3.** The distribution of gene coverage in six library. +Si1, +Si3 and +Si7 represents Si-treated samples obtained at 1, 3 and 7dpi, respectively; -Si1, -Si3 and -Si7 represents untreated samples obtained at 1, 3 and 7dpi, respectively.

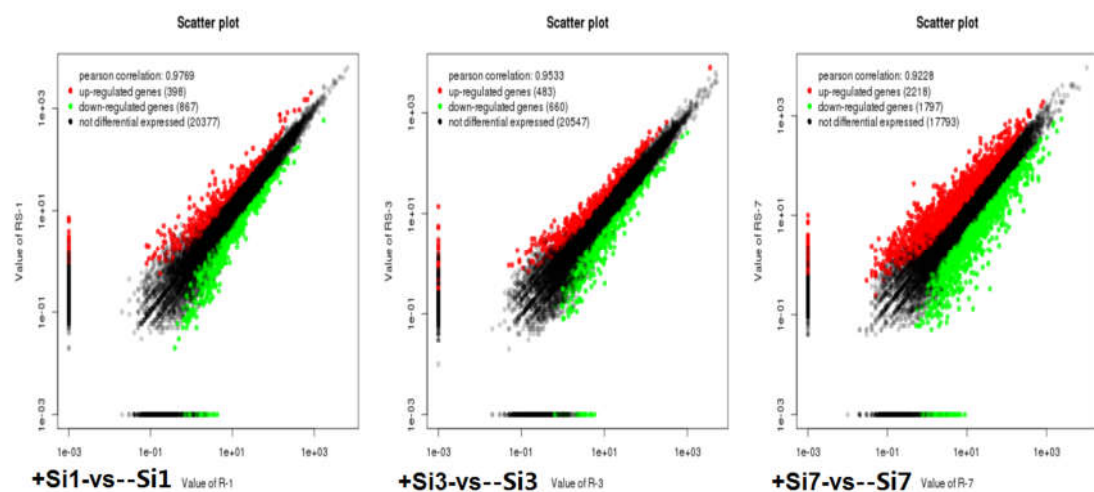

**Figure 4.** Scatter plot of differentially expressed genes in each comparison. +Si1, +Si3 and +Si7 represents Si-treated samples obtained at 1, 3 and 7dpi, respectively; -Si1, -Si3 and -Si7 represents non-Si-treated samples obtained at 1, 3 and 7dpi, respectively.

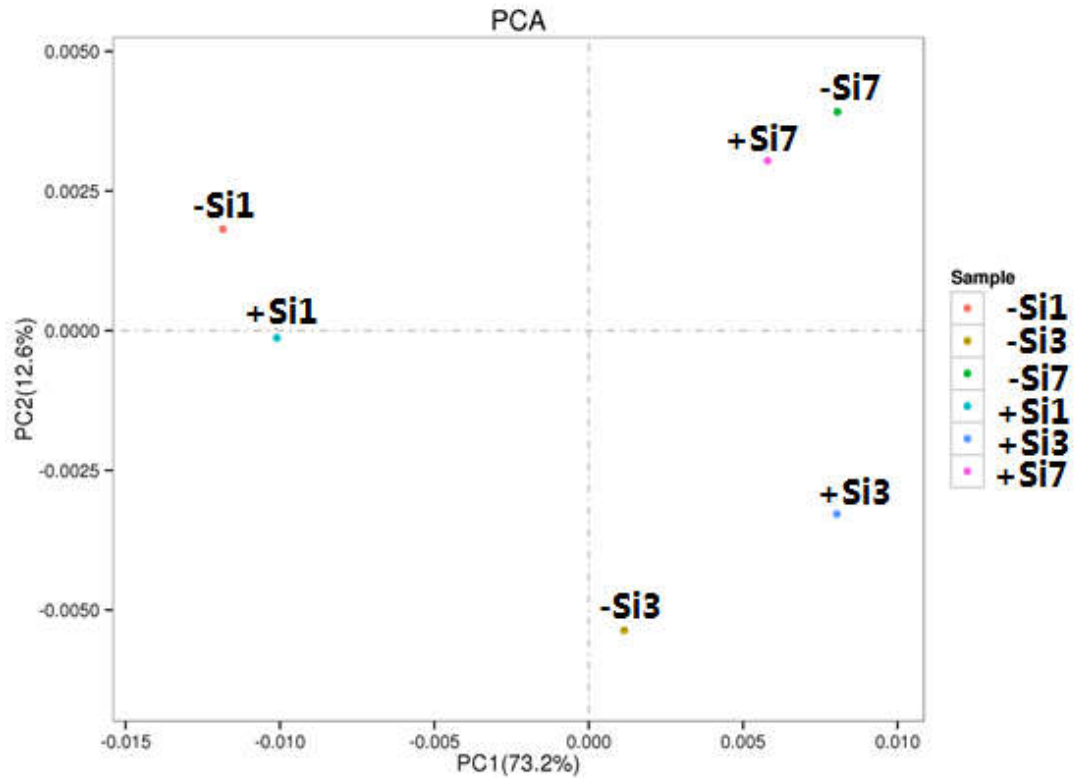

**Figure 5. Principal component analysis (PCA) for all RNA-Seq samples.** +Si1, +Si3 and +Si7 represents Si-treated samples obtained at 1, 3 and 7dpi, respectively; -Si1, -Si3 and -Si7 represents non-Si-treated samples obtained at 1, 3 and 7dpi, respectively.

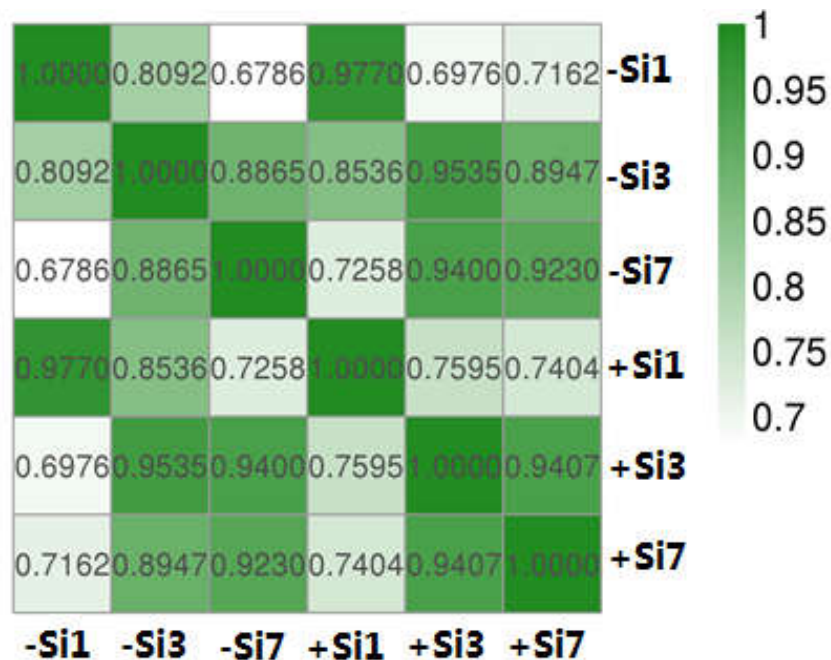

**Figure 6. The Pearson correlation coefficients between six samples.** +Si1, +Si3 and +Si7 represents Si-treated samples obtained at 1, 3 and 7 dpi, respectively; -Si1, -Si3 and -Si7 represents non-Si-treated samples obtained at 1, 3 and 7 dpi, respectively.

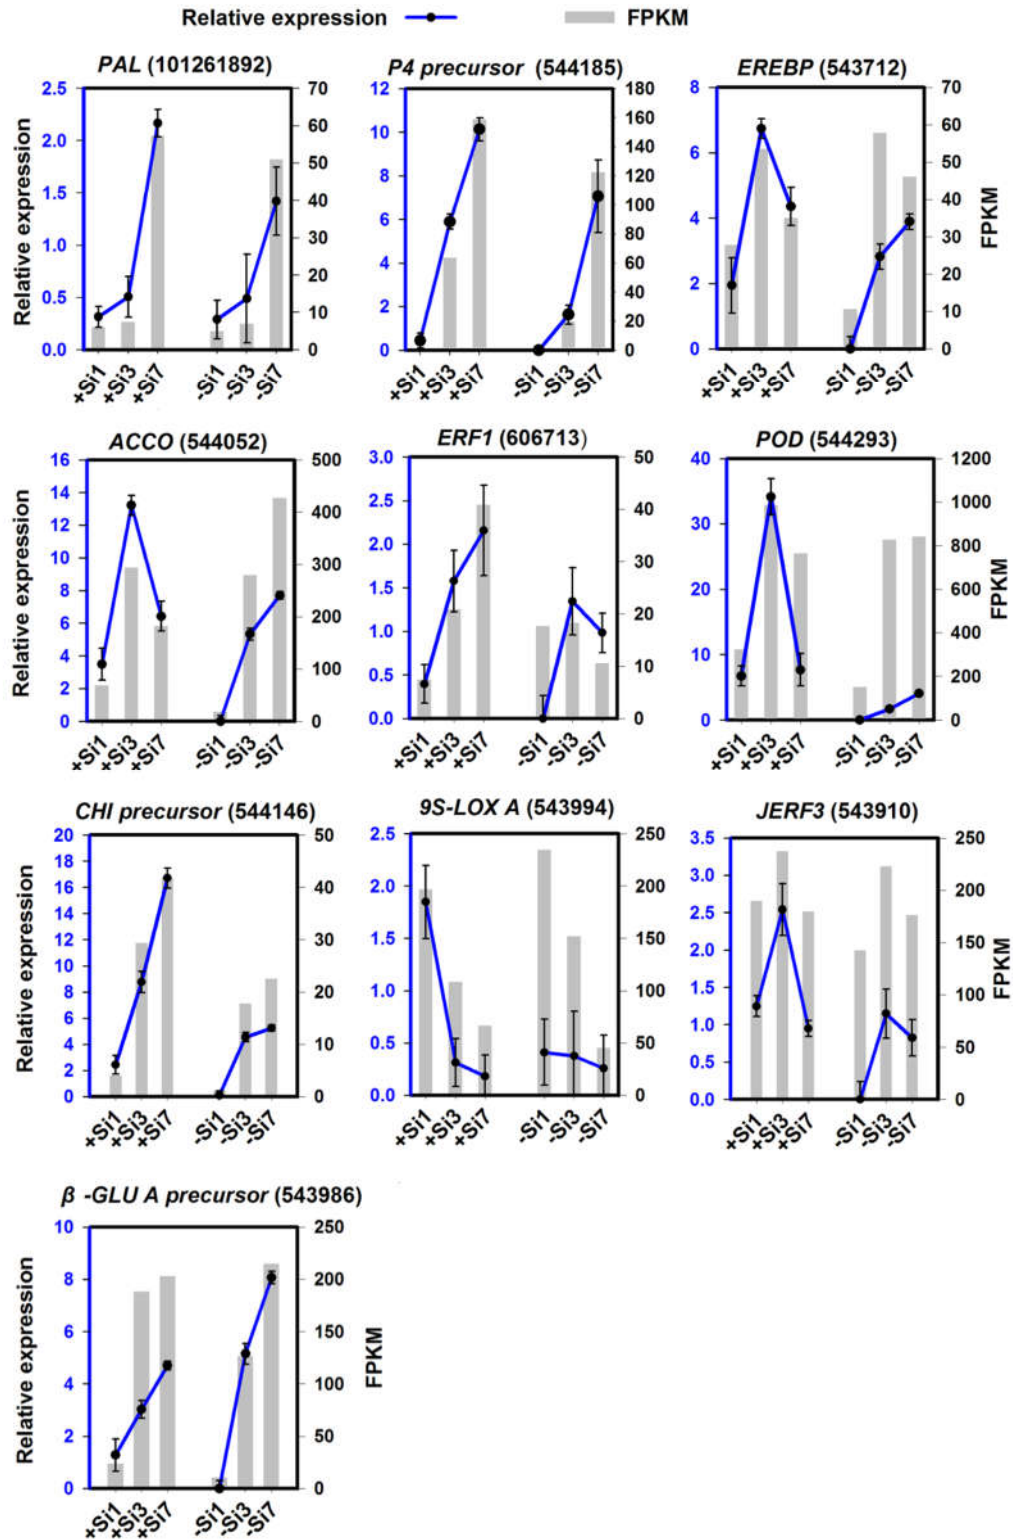

**Figure 7.** Expression of the selected 10 genes revealed by RNA-Seq and qRT-PCR. The expression levels obtained by qRT-PCR are represented in blue lines, qRT-PCR data showed the mean values from three replicates and the error bars represent the SE of the means, while the corresponding expression data for RNA-seq are represented in gray histogram. +Si1, +Si3 and +Si7 represents Si-treated samples obtained at 1, 3 and 7dpi, respectively; -Si1, -Si3 and -Si7 represents non-Si-treated samples obtained at 1, 3 and 7dpi, respectively; PAL: phenylalanine ammonia-lyase; P4 precursor: pathogenesis-related leaf protein 4 precursor; EREBP: ethylene responsive element binding protein; ACCO: 1-Aminocyclopropane-1-carboxylic acid oxidase; ERF1: ethylene response factor 1; POD: peroxidase; CHI precursor: chitinase precursor; 9S-LOX: linoleate 9S-lipoxygenase A; JERF3: Jasmonate and ethylene responsive factor 1;  $\beta$ -GLU A precursor: glucan endo-1,3-beta-glucosidase A precursor.



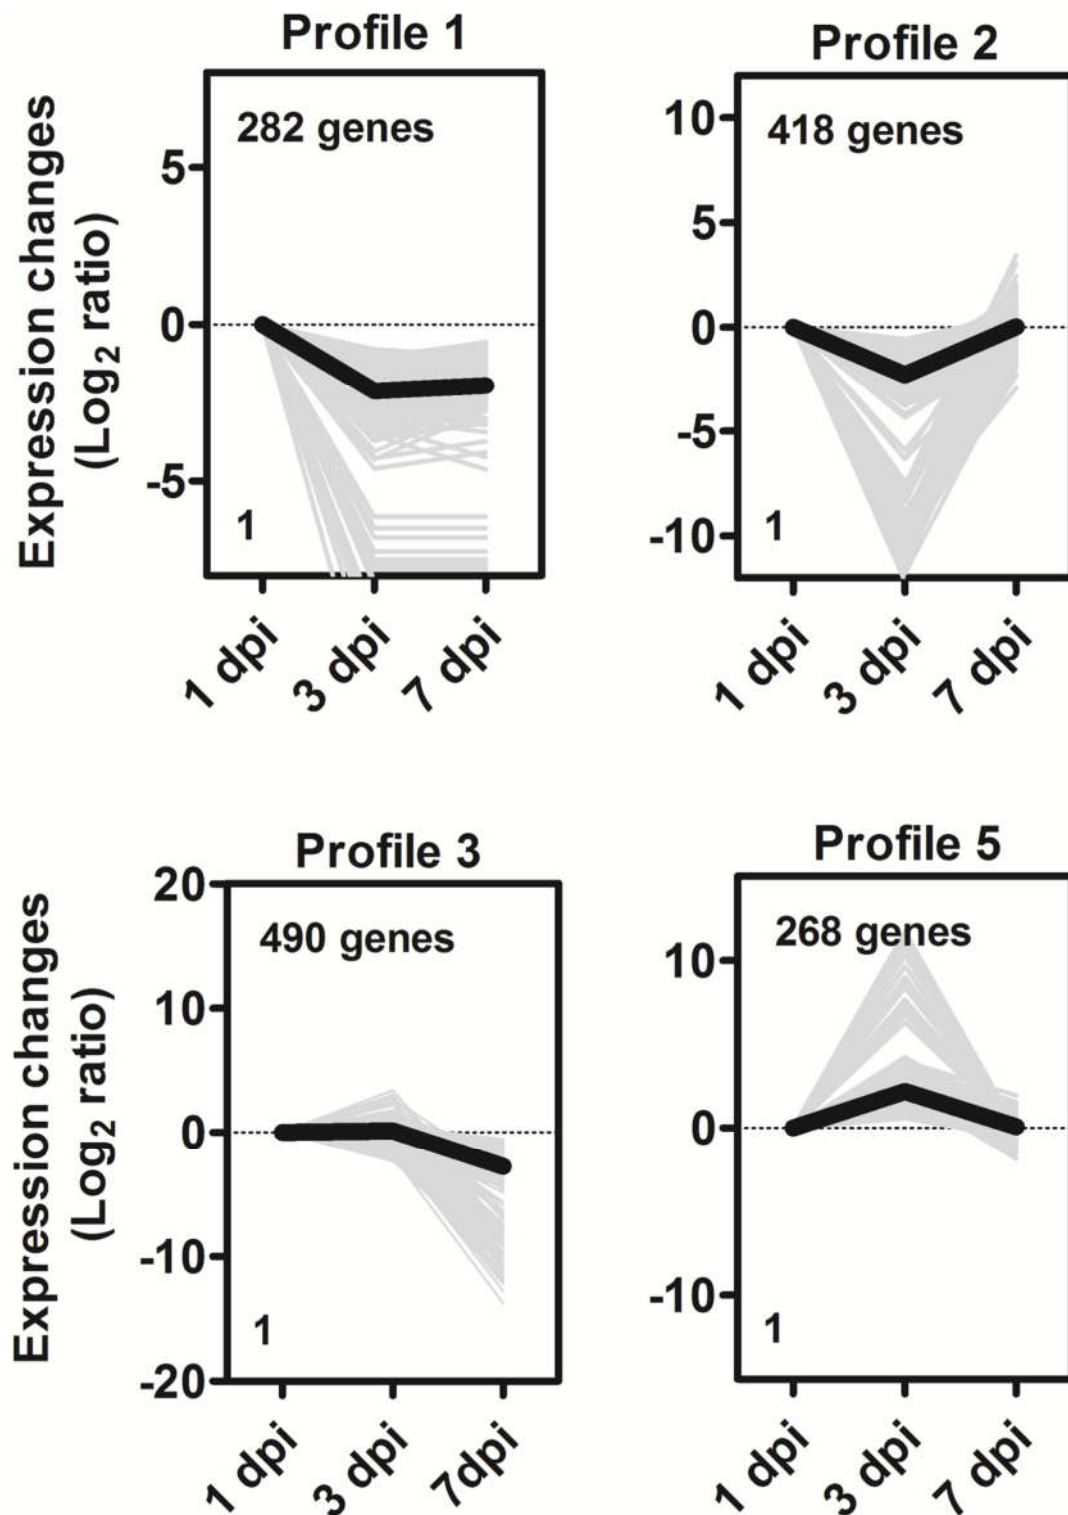

**Figure 8.** Expression profiles of the four statistically non-significant clusters (profile 1, 2, 3 and 5). X- and Y-axes represent days after *R. solanacearum* inoculation (dpi) and log<sub>2</sub> fold change in gene expression between Si-treated and non-Si-treated samples, respectively. The top left hand corner indicates the number of DEGs belonging to each profile. The lower left hand corner contains the *p*-value of each profile.
