# Supplementary material for: Transcriptome Analysis Reveals New Insights into the Bacterial Wilt Resistance Mechanism Mediated by Silicon in Tomato
Source: Int J Mol Sci. 2019 Feb 11;20(3):761. doi: 10.3390/ijms20030761 (PMC6387441; doi:10.3390/ijms20030761)
Supplement: Supplementary file 1 [file ijms-20-00761-s001.zip › Supplementary Tables S1-S12.xlsx]

## Sheet: Table S1
Table S1. List of the different expressed genes in the +Si1 versus -Si1 group
Gene id	-Si1 count	+Si1 count	-Si1 fpkm	+Si1 fpkm	log2(FC)	Pvalue	FDR	significant	Symbol	Description	KEGG_A_class	KEGG_B_class	Pathway	K_ID	GO Component	GO Function	GO Process
100037494	55	22	2.25	0.95	-1.24393	0.00055193	0.00349061	yes	XP_010323569.1	PREDICTED: phototropin-2 isoform X1 [Solanum lycopersicum]	-	-	-	-	GO:0044424//intracellular part;GO:0043229//intracellular organelle;GO:0043227//membrane-bounded organelle;GO:0044464//cell part;GO:0043231//intracellular membrane-bounded organelle;GO:0043226//organelle;GO:0016020//membrane;GO:0005622//intracellular;GO:0005623//cell	GO:0097367//carbohydrate derivative binding;GO:0001882//nucleoside binding;GO:1901363//heterocyclic compound binding;GO:0032549//ribonucleoside binding;GO:0016740//transferase activity;GO:0003824//catalytic activity;GO:0001883//purine nucleoside binding;GO:0032550//purine ribonucleoside binding;GO:0038023//signaling receptor activity;GO:0016773//phosphotransferase activity, alcohol group as accep…	GO:0070271//protein complex biogenesis;GO:0010556//regulation of macromolecule biosynthetic process;GO:0019758//glycosinolate biosynthetic process;GO:1903960//negative regulation of anion transmembrane transport;GO:0044767//single-organism developmental process;GO:0044267//cellular protein metabolic process;GO:0044264//cellular polysaccharide metabolic process;GO:0009451//RNA modification;GO:0044…
100125906	149	464	15.89	52.22	1.71648	3.37e-41	5.07e-39	yes	NP_001234624.1	2-oxoglutarate-dependent dioxygenase [Solanum lycopersicum]	-	-	-	-	-	GO:0016705//oxidoreductase activity, acting on paired donors, with incorporation or reduction of molecular oxygen;GO:0016491//oxidoreductase activity;GO:0043167//ion binding;GO:0003824//catalytic activity;GO:0043169//cation binding;GO:0005488//binding;GO:0046872//metal ion binding	GO:0008152//metabolic process;GO:0044710//single-organism metabolic process;GO:0044699//single-organism process
100125911	565	224	18.3	7.66	-1.25643	7.84e-30	6.98e-28	yes	XP_004241370.1	PREDICTED: structural maintenance of chromosomes protein 3 [Solanum lycopersicum]	-	-	-	-	GO:0098687//chromosomal region;GO:0044428//nuclear part;GO:0043227//membrane-bounded organelle;GO:0005622//intracellular;GO:0044446//intracellular organelle part;GO:0005856//cytoskeleton;GO:0005634//nucleus;GO:0032991//macromolecular complex;GO:0043234//protein complex;GO:0008278//cohesin complex;GO:0043229//intracellular organelle;GO:0043232//intracellular non-membrane-bounded organelle;GO:00056…	GO:0001882//nucleoside binding;GO:0032550//purine ribonucleoside binding;GO:0036094//small molecule binding;GO:0097159//organic cyclic compound binding;GO:0005488//binding;GO:0097367//carbohydrate derivative binding;GO:1901363//heterocyclic compound binding;GO:0001883//purine nucleoside binding;GO:0032549//ribonucleoside binding	GO:0044699//single-organism process;GO:0044260//cellular macromolecule metabolic process;GO:0043331//response to dsRNA;GO:0046483//heterocycle metabolic process;GO:0010605//negative regulation of macromolecule metabolic process;GO:0010467//gene expression;GO:0006807//nitrogen compound metabolic process;GO:0006950//response to stress;GO:0006996//organelle organization;GO:0033554//cellular response…
100134876	280	124	8.94	4.18	-1.09677	4.43e-13	1.17e-11	yes	XP_010323061.1	PREDICTED: structural maintenance of chromosomes protein 1 [Solanum lycopersicum]	-	-	-	-	GO:0043231//intracellular membrane-bounded organelle;GO:0005623//cell;GO:0005622//intracellular;GO:0044464//cell part;GO:0043228//non-membrane-bounded organelle;GO:0043226//organelle;GO:0043234//protein complex;GO:0032991//macromolecular complex;GO:0043227//membrane-bounded organelle;GO:0043232//intracellular non-membrane-bounded organelle;GO:0043229//intracellular organelle;GO:0044424//intracell…	GO:0032549//ribonucleoside binding;GO:0097367//carbohydrate derivative binding;GO:0005515//protein binding;GO:0036094//small molecule binding;GO:0001882//nucleoside binding;GO:1901363//heterocyclic compound binding;GO:0001883//purine nucleoside binding;GO:0032550//purine ribonucleoside binding;GO:0097159//organic cyclic compound binding;GO:0005488//binding;GO:0046983//protein dimerization activity	GO:0006996//organelle organization;GO:0090304//nucleic acid metabolic process;GO:0008152//metabolic process;GO:0033554//cellular response to stress;GO:0006259//DNA metabolic process;GO:0051276//chromosome organization;GO:0022402//cell cycle process;GO:0016043//cellular component organization;GO:0051716//cellular response to stimulus;GO:0044238//primary metabolic process;GO:1902589//single-organis…
100134906	375	134	52.9	19.94	-1.4076	3.33e-24	2.09e-22	yes	NP_001234859.2	beta-expansin precursor [Solanum lycopersicum]	-	-	-	-	GO:0030312//external encapsulating structure;GO:0005623//cell;GO:0044464//cell part;GO:0071944//cell periphery	-	GO:0009653//anatomical structure morphogenesis;GO:0032502//developmental process;GO:0009664//plant-type cell wall organization;GO:0071840//cellular component organization or biogenesis;GO:0009987//cellular process;GO:0009827//plant-type cell wall modification;GO:0044699//single-organism process;GO:0032989//cellular component morphogenesis;GO:0048856//anatomical structure development;GO:0000003//r…
100147727	10	25	1.52	4.01	1.39953	0.0114032	0.0454826	yes	NP_001233847.1	carbonic anhydrase [Solanum lycopersicum]	Metabolism	Energy metabolism	ko00910//Nitrogen metabolism	K01673	GO:0009536//plastid;GO:0043229//intracellular organelle;GO:0044444//cytoplasmic part;GO:0044422//organelle part;GO:0044464//cell part;GO:0043231//intracellular membrane-bounded organelle;GO:0044424//intracellular part;GO:0044446//intracellular organelle part;GO:0005622//intracellular;GO:0043226//organelle;GO:0043227//membrane-bounded organelle;GO:0009532//plastid stroma;GO:0044435//plastid part;G…	GO:0016829//lyase activity;GO:0046914//transition metal ion binding;GO:0016836//hydro-lyase activity;GO:0005488//binding;GO:0043169//cation binding;GO:0016835//carbon-oxygen lyase activity;GO:0003824//catalytic activity;GO:0043167//ion binding;GO:0046872//metal ion binding	GO:0044699//single-organism process
100191110	35	13	3.52	1.38	-1.35091	0.00312177	0.0156065	yes	XP_004231047.1	PREDICTED: glycerate dehydrogenase [Solanum lycopersicum]	Metabolism	Amino acid metabolism;Global and Overview;Carbohydrate metabolism	ko01200//Carbon metabolism;ko00630//Glyoxylate and dicarboxylate metabolism;ko00260//Glycine, serine and threonine metabolism	K15893	-	GO:0005488//binding;GO:0097159//organic cyclic compound binding;GO:0016614//oxidoreductase activity, acting on CH-OH group of donors;GO:0016616//oxidoreductase activity, acting on the CH-OH group of donors, NAD or NADP as acceptor;GO:1901265//nucleoside phosphate binding;GO:0000166//nucleotide binding;GO:0036094//small molecule binding;GO:0016491//oxidoreductase activity;GO:1901363//heterocyclic …	GO:0044710//single-organism metabolic process;GO:0008152//metabolic process;GO:0044699//single-organism process
100191111	2725	6515	589.42	1486.79	1.33483	2.22e-289	5.33e-286	yes	NP_001234358.1	PR1 protein precursor [Solanum lycopersicum]	Organismal Systems;Environmental Information Processing	Signal transduction;Environmental adaptation	ko04075//Plant hormone signal transduction;ko04626//Plant-pathogen interaction	K13449	-	-	GO:0006950//response to stress;GO:0050896//response to stimulus
100191112	12	1	1.28	0.11	-3.54057	0.0034275	0.0169317	yes	NP_001234363.1	gibberellin 20-oxidase 4 [Solanum lycopersicum]	Metabolism	Metabolism of terpenoids and polyketides	ko00904//Diterpenoid biosynthesis	K05282	-	GO:0043167//ion binding;GO:0046872//metal ion binding;GO:0043169//cation binding;GO:0016705//oxidoreductase activity, acting on paired donors, with incorporation or reduction of molecular oxygen;GO:0016491//oxidoreductase activity;GO:0046914//transition metal ion binding;GO:0003824//catalytic activity;GO:0005488//binding	GO:0044699//single-organism process;GO:0044710//single-organism metabolic process;GO:0008152//metabolic process
100527971	147	69	9.75	4.83	-1.01338	8.21e-07	9.45e-06	yes	NP_001234204.1	auxin efflux facilitator SlPIN7 [Solanum lycopersicum]	-	-	-	-	GO:0031224//intrinsic component of membrane;GO:0044425//membrane part;GO:0016020//membrane	-	GO:0044699//single-organism process;GO:0044763//single-organism cellular process;GO:0009987//cellular process
100736435	452	933	115.02	250.64	1.12373	5.94e-42	9.32e-40	yes	NP_001234498.1	non-symbiotic hemoglobin class 1 [Solanum lycopersicum]	-	-	-	-	GO:0005623//cell;GO:0044464//cell part;GO:0005911//cell-cell junction;GO:0005622//intracellular;GO:0005737//cytoplasm;GO:0016020//membrane;GO:0044424//intracellular part;GO:0030312//external encapsulating structure;GO:0030054//cell junction;GO:0071944//cell periphery;GO:0044444//cytoplasmic part	GO:0043167//ion binding;GO:0097159//organic cyclic compound binding;GO:0022892//substrate-specific transporter activity;GO:0046906//tetrapyrrole binding;GO:0005488//binding;GO:0005215//transporter activity;GO:0043169//cation binding;GO:0046872//metal ion binding;GO:1901363//heterocyclic compound binding;GO:0046914//transition metal ion binding	GO:0044699//single-organism process;GO:0071941//nitrogen cycle metabolic process;GO:0071407//cellular response to organic cyclic compound;GO:0006807//nitrogen compound metabolic process;GO:0019222//regulation of metabolic process;GO:0071446//cellular response to salicylic acid stimulus;GO:0050789//regulation of biological process;GO:0009987//cellular process;GO:0007165//signal transduction;GO:000…
100736515	34	7	4.01	0.87	-2.20451	4.3e-05	0.00036082	yes	NP_001233783.1	TCP transcription factor 1 [Solanum lycopersicum]	-	-	-	-	-	-	-
100736526	101	210	11.63	25.52	1.13378	4.59e-11	9.74e-10	yes	NP_001233840.2	flavonoid biosynthesis oxidoreductase protein [Solanum lycopersicum]	-	-	-	-	-	GO:0016491//oxidoreductase activity;GO:0051213//dioxygenase activity;GO:0016705//oxidoreductase activity, acting on paired donors, with incorporation or reduction of molecular oxygen;GO:0003824//catalytic activity;GO:0043169//cation binding;GO:0043167//ion binding;GO:0005488//binding;GO:0016706//oxidoreductase activity, acting on paired donors, with incorporation or reduction of molecular oxygen,…	GO:0009863//salicylic acid mediated signaling pathway;GO:1901360//organic cyclic compound metabolic process;GO:0006955//immune response;GO:0045184//establishment of protein localization;GO:0044237//cellular metabolic process;GO:0009696//salicylic acid metabolic process;GO:0044699//single-organism process;GO:0006725//cellular aromatic compound metabolic process;GO:1901698//response to nitrogen com…
100736535	147	63	12.16	5.51	-1.14202	5.59e-08	7.85e-07	yes	NP_001233891.2	AP2 transcription factor SlAP2e [Solanum lycopersicum]	-	-	-	-	GO:0043226//organelle;GO:0044424//intracellular part;GO:0005623//cell;GO:0043229//intracellular organelle;GO:0043227//membrane-bounded organelle;GO:0005622//intracellular;GO:0044464//cell part;GO:0043231//intracellular membrane-bounded organelle	GO:0097159//organic cyclic compound binding;GO:0005488//binding;GO:0003676//nucleic acid binding;GO:0001071//nucleic acid binding transcription factor activity;GO:1901363//heterocyclic compound binding	GO:0009058//biosynthetic process;GO:0010468//regulation of gene expression;GO:0034645//cellular macromolecule biosynthetic process;GO:0043170//macromolecule metabolic process;GO:0065007//biological regulation;GO:0044260//cellular macromolecule metabolic process;GO:0071704//organic substance metabolic process;GO:1901576//organic substance biosynthetic process;GO:0009987//cellular process;GO:004423…
100736541	58	16	4.6	1.34	-1.7794	3.53e-06	3.66e-05	yes	NP_001233924.1	LAX5 protein [Solanum lycopersicum]	Environmental Information Processing	Signal transduction	ko04075//Plant hormone signal transduction	K13946	GO:0016020//membrane;GO:0031224//intrinsic component of membrane;GO:0044425//membrane part	GO:0015291//secondary active transmembrane transporter activity;GO:0022857//transmembrane transporter activity;GO:0005215//transporter activity;GO:0022804//active transmembrane transporter activity	GO:0003002//regionalization;GO:0006811//ion transport;GO:0007275//multicellular organism development;GO:0050793//regulation of developmental process;GO:0032501//multicellular organismal process;GO:0042221//response to chemical;GO:0009987//cellular process;GO:0023052//signaling;GO:0044699//single-organism process;GO:0010051//xylem and phloem pattern formation;GO:0051179//localization;GO:0006810//t…
100736543	105	44	6.61	2.92	-1.17868	3.74e-06	3.86e-05	yes	NP_001233936.1	Lyk10 precursor [Solanum lycopersicum]	-	-	-	-	-	GO:0016773//phosphotransferase activity, alcohol group as acceptor;GO:0003824//catalytic activity;GO:0001883//purine nucleoside binding;GO:0016301//kinase activity;GO:0016740//transferase activity;GO:0016772//transferase activity, transferring phosphorus-containing groups;GO:0032550//purine ribonucleoside binding;GO:0001882//nucleoside binding;GO:0004672//protein kinase activity;GO:0032549//ribon…	GO:0006464//cellular protein modification process;GO:0036211//protein modification process;GO:0044260//cellular macromolecule metabolic process;GO:0016310//phosphorylation;GO:0009987//cellular process;GO:0006796//phosphate-containing compound metabolic process;GO:0043170//macromolecule metabolic process;GO:0019538//protein metabolic process;GO:0043412//macromolecule modification;GO:0044238//prima…
100736544	45	21	3.4	1.67	-1.02569	0.00932491	0.0384839	yes	NP_001233940.1	castasterone 26-hydroxylase [Solanum lycopersicum]	Metabolism	Metabolism of terpenoids and polyketides	ko00905//Brassinosteroid biosynthesis	K15639	GO:0044425//membrane part;GO:0016020//membrane;GO:0031224//intrinsic component of membrane	GO:0097159//organic cyclic compound binding;GO:0005488//binding;GO:0016491//oxidoreductase activity;GO:0046914//transition metal ion binding;GO:0043167//ion binding;GO:0046906//tetrapyrrole binding;GO:0043169//cation binding;GO:0004497//monooxygenase activity;GO:0046872//metal ion binding;GO:1901363//heterocyclic compound binding;GO:0003824//catalytic activity	GO:0050896//response to stimulus;GO:0044238//primary metabolic process;GO:0009719//response to endogenous stimulus;GO:0008202//steroid metabolic process;GO:0010033//response to organic substance;GO:0042221//response to chemical;GO:0009725//response to hormone;GO:0040007//growth;GO:1901360//organic cyclic compound metabolic process;GO:0006066//alcohol metabolic process;GO:0071704//organic substanc…
100820700	13	235	0.91	17.36	4.25376	1.1e-55	2.58e-53	yes	NP_001239040.1	viridiflorene synthase [Solanum lycopersicum]	Metabolism	Metabolism of terpenoids and polyketides	ko00909//Sesquiterpenoid and triterpenoid biosynthesis	K14182	GO:0005623//cell;GO:0005622//intracellular;GO:0044424//intracellular part;GO:0044464//cell part	GO:0043169//cation binding;GO:0016838//carbon-oxygen lyase activity, acting on phosphates;GO:0010333//terpene synthase activity;GO:0003824//catalytic activity;GO:0005488//binding;GO:0043167//ion binding;GO:0010334//sesquiterpene synthase activity;GO:0016835//carbon-oxygen lyase activity;GO:0046872//metal ion binding;GO:0016829//lyase activity	GO:0044238//primary metabolic process;GO:0006720//isoprenoid metabolic process;GO:0044763//single-organism cellular process;GO:0044255//cellular lipid metabolic process;GO:0071704//organic substance metabolic process;GO:0008152//metabolic process;GO:0006629//lipid metabolic process;GO:0009987//cellular process;GO:0044710//single-organism metabolic process;GO:0006721//terpenoid metabolic process;G…
101055532	47	20	3.77	1.69	-1.15754	0.00311407	0.0155795	yes	NP_001265995.1	Hop-interacting protein THI116 [Solanum lycopersicum]	-	-	-	-	GO:0071944//cell periphery;GO:0005623//cell;GO:0044459//plasma membrane part;GO:0016020//membrane;GO:0005886//plasma membrane;GO:0044425//membrane part;GO:0044464//cell part	-	GO:0044403//symbiosis, encompassing mutualism through parasitism;GO:0044419//interspecies interaction between organisms;GO:0051704//multi-organism process
101055544	70	25	11.65	4.39	-1.40804	1.81e-05	0.000164065	yes	NP_001266062.1	IAA11 [Solanum lycopersicum]	Environmental Information Processing	Signal transduction	ko04075//Plant hormone signal transduction	K14484	GO:0005623//cell;GO:0043226//organelle;GO:0043229//intracellular organelle;GO:0043227//membrane-bounded organelle;GO:0044464//cell part;GO:0005622//intracellular;GO:0043231//intracellular membrane-bounded organelle;GO:0044424//intracellular part	GO:0005515//protein binding;GO:0005488//binding	GO:0048878//chemical homeostasis;GO:0008152//metabolic process;GO:1901576//organic substance biosynthetic process;GO:0071704//organic substance metabolic process;GO:0032870//cellular response to hormone stimulus;GO:0070887//cellular response to chemical stimulus;GO:0042592//homeostatic process;GO:0010468//regulation of gene expression;GO:0071495//cellular response to endogenous stimulus;GO:005089…
101055556	14	1	2.24	0.17	-3.71989	0.000980413	0.00576871	yes	NP_001266100.1	IAA36 [Solanum lycopersicum]	Environmental Information Processing	Signal transduction	ko04075//Plant hormone signal transduction	K14484	GO:0005622//intracellular;GO:0043231//intracellular membrane-bounded organelle;GO:0044464//cell part;GO:0005623//cell;GO:0044424//intracellular part;GO:0043229//intracellular organelle;GO:0043226//organelle;GO:0043227//membrane-bounded organelle	GO:0005515//protein binding;GO:0005488//binding	GO:0044249//cellular biosynthetic process;GO:0043170//macromolecule metabolic process;GO:0044237//cellular metabolic process;GO:0065007//biological regulation;GO:0042221//response to chemical;GO:0070887//cellular response to chemical stimulus;GO:0007165//signal transduction;GO:0050789//regulation of biological process;GO:0044700//single organism signaling;GO:0060255//regulation of macromolecule m…
101055559	962	455	48.33	24.12	-1.00269	3.31e-34	3.52e-32	yes	NP_001266107.1	SlArf/Xyl2 protein precursor [Solanum lycopersicum]	-	-	-	-	GO:0030312//external encapsulating structure;GO:0071944//cell periphery;GO:0005618//cell wall;GO:0031012//extracellular matrix;GO:0005623//cell;GO:0044464//cell part	GO:0003824//catalytic activity;GO:0004553//hydrolase activity, hydrolyzing O-glycosyl compounds;GO:0016787//hydrolase activity;GO:0016798//hydrolase activity, acting on glycosyl bonds;GO:0015926//glucosidase activity	GO:0008152//metabolic process;GO:0044238//primary metabolic process;GO:0042221//response to chemical;GO:0050896//response to stimulus
101055561	298	120	14.95	6.35	-1.23532	2.83e-16	1.01e-14	yes	NP_001266114.1	SlArf/Xyl4 protein precursor [Solanum lycopersicum]	-	-	-	-	-	GO:0004553//hydrolase activity, hydrolyzing O-glycosyl compounds;GO:0015926//glucosidase activity;GO:0003824//catalytic activity;GO:0016787//hydrolase activity;GO:0016798//hydrolase activity, acting on glycosyl bonds	GO:0008152//metabolic process;GO:0044238//primary metabolic process
101055578	4	35.34	0.32	2.94	3.19967	1.9e-07	2.44e-06	yes	NP_001266171.1	cytokinin hydroxylase-like [Solanum lycopersicum]	Metabolism	Metabolism of terpenoids and polyketides	ko00908//Zeatin biosynthesis	K10717	-	GO:0016634//oxidoreductase activity, acting on the CH-CH group of donors, oxygen as acceptor;GO:0046914//transition metal ion binding;GO:0005488//binding;GO:0046906//tetrapyrrole binding;GO:0097159//organic cyclic compound binding;GO:0003824//catalytic activity;GO:1901363//heterocyclic compound binding;GO:0016491//oxidoreductase activity;GO:0043167//ion binding;GO:0016627//oxidoreductase activity…	GO:0008152//metabolic process;GO:0044699//single-organism process;GO:0044710//single-organism metabolic process
101055589	26	8	2.22	0.72	-1.62449	0.00458378	0.021561	yes	NP_001266200.1	AT3 protein [Solanum lycopersicum]	Metabolism	Biosynthesis of other secondary metabolites	ko00940//Phenylpropanoid biosynthesis;ko00941//Flavonoid biosynthesis;ko00945//Stilbenoid, diarylheptanoid and gingerol biosynthesis	K13065	-	GO:0003824//catalytic activity;GO:0016740//transferase activity;GO:0016746//transferase activity, transferring acyl groups	-
101243648	30	58	7.95	16.21	1.02786	0.00186615	0.010044	yes	XP_004231051.1	DUF1279 family protein [Medicago truncatula]	-	-	-	-	GO:0043227//membrane-bounded organelle;GO:0044464//cell part;GO:0043229//intracellular organelle;GO:0005622//intracellular;GO:0044424//intracellular part;GO:0043226//organelle;GO:0043231//intracellular membrane-bounded organelle;GO:0005623//cell	-	GO:0006979//response to oxidative stress;GO:0019538//protein metabolic process;GO:0008152//metabolic process;GO:0044238//primary metabolic process;GO:0006950//response to stress;GO:0050896//response to stimulus;GO:0043170//macromolecule metabolic process;GO:0042221//response to chemical;GO:0044267//cellular protein metabolic process;GO:0071704//organic substance metabolic process;GO:0009628//resp…
101243658	107	47	3.06	1.42	-1.10764	8.11e-06	7.88e-05	yes	XP_019066664.1	PREDICTED: LOW QUALITY PROTEIN: protein TONSOKU [Solanum lycopersicum]	-	-	-	-	-	-	GO:0009933//meristem structural organization;GO:0009653//anatomical structure morphogenesis;GO:0044763//single-organism cellular process;GO:0048507//meristem development;GO:0044767//single-organism developmental process;GO:0009987//cellular process;GO:0032502//developmental process;GO:0009888//tissue development;GO:0048856//anatomical structure development;GO:0048532//anatomical structure arrange…
101243668	167	62	9.46	3.71	-1.35042	4.88e-11	1.04e-09	yes	XP_004251168.1	PREDICTED: BEL1-like homeodomain protein 9 [Solanum lycopersicum]	-	-	-	-	GO:0005622//intracellular;GO:0043229//intracellular organelle;GO:0005623//cell;GO:0043226//organelle;GO:0044424//intracellular part;GO:0044464//cell part;GO:0043231//intracellular membrane-bounded organelle;GO:0043227//membrane-bounded organelle	GO:0003676//nucleic acid binding;GO:0001071//nucleic acid binding transcription factor activity;GO:0005488//binding;GO:1901363//heterocyclic compound binding;GO:0003677//DNA binding;GO:0097159//organic cyclic compound binding	GO:0060255//regulation of macromolecule metabolic process;GO:0007389//pattern specification process;GO:0009653//anatomical structure morphogenesis;GO:0044249//cellular biosynthetic process;GO:0044699//single-organism process;GO:0032501//multicellular organismal process;GO:0009955//adaxial/abaxial pattern specification;GO:0044702//single organism reproductive process;GO:0009058//biosynthetic proce…
101243766	59	27	8.64	4.17	-1.05098	0.00164258	0.00901336	yes	NP_001296244.1	chlorophyll a-b binding protein 13, chloroplastic [Solanum lycopersicum]	Metabolism	Energy metabolism	ko00196//Photosynthesis - antenna proteins	K08914	GO:0043226//organelle;GO:0016020//membrane;GO:0005622//intracellular;GO:0043229//intracellular organelle;GO:0044425//membrane part;GO:0044424//intracellular part;GO:0043231//intracellular membrane-bounded organelle;GO:0009536//plastid;GO:0044464//cell part;GO:0044444//cytoplasmic part;GO:0005623//cell;GO:0034357//photosynthetic membrane;GO:0005737//cytoplasm;GO:0009521//photosystem;GO:0009579//th…	GO:0046906//tetrapyrrole binding;GO:0005488//binding;GO:0097159//organic cyclic compound binding;GO:0043169//cation binding;GO:1901363//heterocyclic compound binding;GO:0043167//ion binding	GO:0006091//generation of precursor metabolites and energy;GO:0019538//protein metabolic process;GO:0071704//organic substance metabolic process;GO:0044237//cellular metabolic process;GO:0043412//macromolecule modification;GO:0009987//cellular process;GO:0008152//metabolic process;GO:0036211//protein modification process;GO:0043170//macromolecule metabolic process;GO:0044267//cellular protein met…
101243856	34	14	2.15	0.94	-1.1936	0.00801499	0.0341525	yes	XP_004233109.1	PREDICTED: pentatricopeptide repeat-containing protein At3g20730 isoform X1 [Solanum lycopersicum]	-	-	-	-	-	-	-
101243864	59	14	9.9	2.48	-1.99709	4.28e-07	5.19e-06	yes	NP_001304899.1	PREDICTED: cytochrome b6-f complex iron-sulfur subunit, chloroplastic [Solanum lycopersicum]	Metabolism	Energy metabolism	ko00195//Photosynthesis	K02636	GO:0044424//intracellular part;GO:0031984//organelle subcompartment;GO:0005623//cell;GO:0043226//organelle;GO:0044422//organelle part;GO:0009579//thylakoid;GO:0044434//chloroplast part;GO:0005622//intracellular;GO:0031224//intrinsic component of membrane;GO:0005737//cytoplasm;GO:0044425//membrane part;GO:0031967//organelle envelope;GO:0031976//plastid thylakoid;GO:0009507//chloroplast;GO:0044436/…	GO:0016491//oxidoreductase activity;GO:0015078//hydrogen ion transmembrane transporter activity;GO:0015077//monovalent inorganic cation transmembrane transporter activity;GO:0043169//cation binding;GO:0005215//transporter activity;GO:0022890//inorganic cation transmembrane transporter activity;GO:0008324//cation transmembrane transporter activity;GO:0051540//metal cluster binding;GO:0051536//iron…	GO:0009605//response to external stimulus;GO:0044281//small molecule metabolic process;GO:0043623//cellular protein complex assembly;GO:0042537//benzene-containing compound metabolic process;GO:0050789//regulation of biological process;GO:0071310//cellular response to organic substance;GO:0051641//cellular localization;GO:0009719//response to endogenous stimulus;GO:0008104//protein localization;G…
101243865	19	5	1.77	0.49	-1.8529	0.00664208	0.0293363	yes	XP_004252072.1	PREDICTED: polygalacturonase QRT2 [Solanum lycopersicum]	Metabolism	Carbohydrate metabolism	ko00500//Starch and sucrose metabolism;ko00040//Pentose and glucuronate interconversions	K01213	-	GO:0016798//hydrolase activity, acting on glycosyl bonds;GO:0016787//hydrolase activity;GO:0003824//catalytic activity	GO:0008152//metabolic process
101243868	58	17	11.46	3.54	-1.69479	7.52e-06	7.36e-05	yes	NP_001304930.1	PREDICTED: cyclin-U4-1 [Solanum lycopersicum]	-	-	-	-	-	GO:0019899//enzyme binding;GO:0005488//binding;GO:0019900//kinase binding;GO:0005515//protein binding	GO:0050789//regulation of biological process;GO:0051726//regulation of cell cycle;GO:0008152//metabolic process;GO:0065007//biological regulation;GO:0044237//cellular metabolic process;GO:0050794//regulation of cellular process;GO:0006793//phosphorus metabolic process;GO:0009987//cellular process;GO:0006796//phosphate-containing compound metabolic process
101243888	30	4	5.29	0.74	-2.83767	1.11e-05	0.000104996	yes	XP_004238892.1	PREDICTED: E3 ubiquitin-protein ligase MBR1-like [Nicotiana tomentosiformis]	-	-	-	-	-	-	-
101243897	109	33	14.63	4.67	-1.64744	6.22e-10	1.14e-08	yes	XP_004240991.1	PREDICTED: endochitinase PR4-like [Solanum lycopersicum]	Metabolism	Carbohydrate metabolism	ko00520//Amino sugar and nucleotide sugar metabolism	K01183	-	GO:0097367//carbohydrate derivative binding;GO:0016787//hydrolase activity;GO:0005488//binding;GO:0003824//catalytic activity;GO:0004553//hydrolase activity, hydrolyzing O-glycosyl compounds;GO:0016798//hydrolase activity, acting on glycosyl bonds	GO:0006807//nitrogen compound metabolic process;GO:0044237//cellular metabolic process;GO:1901135//carbohydrate derivative metabolic process;GO:0071704//organic substance metabolic process;GO:0009987//cellular process;GO:0071554//cell wall organization or biogenesis;GO:1901575//organic substance catabolic process;GO:0006022//aminoglycan metabolic process;GO:0043170//macromolecule metabolic proces…
101243909	268	572	33.77	76.04	1.17102	1.17e-28	9.71e-27	yes	XP_004244276.2	PREDICTED: epidermis-specific secreted glycoprotein EP1-like [Solanum lycopersicum]	-	-	-	-	-	GO:0005488//binding	-
101243914	206	94	19.14	9.22	-1.05375	2.18e-09	3.76e-08	yes	NP_001296826.1	PREDICTED: chromatin assembly factor 1 subunit A-B-like [Solanum tuberosum]	-	-	-	-	-	-	-
101243932	24	6	7.99	2.11	-1.92095	0.00233202	0.0121438	yes	XP_004247704.1	BnaA04g06030D [Brassica napus]	-	-	-	-	-	-	-
101244059	12	45	1.31	5.19	1.98617	3.41e-06	3.55e-05	yes	NP_001297253.1	PREDICTED: protein trichome birefringence-like 41 isoform X1 [Nicotiana sylvestris]	-	-	-	-	-	-	-
101244067	43	15	2.22	0.82	-1.43686	0.000876429	0.00524694	yes	XP_004235606.1	PREDICTED: phospholipase D epsilon [Solanum lycopersicum]	Cellular Processes;Metabolism	Transport and catabolism;Lipid metabolism	ko04144//Endocytosis;ko00564//Glycerophospholipid metabolism;ko00565//Ether lipid metabolism	K01115	GO:0005622//intracellular;GO:0005623//cell;GO:0016020//membrane;GO:0044464//cell part;GO:0044424//intracellular part	GO:0046872//metal ion binding;GO:0016787//hydrolase activity;GO:0043169//cation binding;GO:0005488//binding;GO:0004620//phospholipase activity;GO:0016298//lipase activity;GO:0016788//hydrolase activity, acting on ester bonds;GO:0003824//catalytic activity;GO:0043167//ion binding	GO:0006650//glycerophospholipid metabolic process;GO:0032501//multicellular organismal process;GO:0019637//organophosphate metabolic process;GO:0042594//response to starvation;GO:0006644//phospholipid metabolic process;GO:0044710//single-organism metabolic process;GO:0006950//response to stress;GO:0044707//single-multicellular organism process;GO:0044237//cellular metabolic process;GO:0009267//ce…
101244079	13	77	1	6.24	2.64155	3.34e-13	8.89e-12	yes	XP_010321305.1	PREDICTED: protein disulfide-isomerase-like isoform X2 [Solanum lycopersicum]	Genetic Information Processing	Folding, sorting and degradation	ko04141//Protein processing in endoplasmic reticulum	K09580	GO:0043227//membrane-bounded organelle;GO:0043226//organelle;GO:0043229//intracellular organelle;GO:0005622//intracellular;GO:0005623//cell;GO:0044424//intracellular part;GO:0043231//intracellular membrane-bounded organelle;GO:0044464//cell part	GO:0016860//intramolecular oxidoreductase activity;GO:0016853//isomerase activity;GO:0003824//catalytic activity;GO:0016864//intramolecular oxidoreductase activity, transposing S-S bonds	GO:0019725//cellular homeostasis;GO:0065007//biological regulation;GO:0042592//homeostatic process;GO:0008152//metabolic process;GO:0044237//cellular metabolic process;GO:0019538//protein metabolic process;GO:0065008//regulation of biological quality;GO:0044267//cellular protein metabolic process;GO:0043170//macromolecule metabolic process;GO:0044763//single-organism cellular process;GO:0044238//…
101244100	1685	677	151.51	64.23	-1.23809	2.93e-78	1.18e-75	yes	XP_004245212.1	PREDICTED: vegetative cell wall protein gp1-like [Solanum lycopersicum]	-	-	-	-	-	-	-
101244176	157	73	4.42	2.17	-1.02635	3.06e-07	3.78e-06	yes	XP_004236610.1	PREDICTED: magnesium-chelatase subunit ChlH, chloroplastic [Solanum lycopersicum]	Metabolism	Metabolism of cofactors and vitamins	ko00860//Porphyrin and chlorophyll metabolism	K03403	GO:0044434//chloroplast part;GO:0044464//cell part;GO:0043227//membrane-bounded organelle;GO:0031975//envelope;GO:0044435//plastid part;GO:0042170//plastid membrane;GO:0016020//membrane;GO:0043229//intracellular organelle;GO:0009526//plastid envelope;GO:0009507//chloroplast;GO:0005737//cytoplasm;GO:0009528//plastid inner membrane;GO:0044422//organelle part;GO:0044424//intracellular part;GO:004323…	GO:0001882//nucleoside binding;GO:0097367//carbohydrate derivative binding;GO:0051003//ligase activity, forming nitrogen-metal bonds, forming coordination complexes;GO:0036094//small molecule binding;GO:0032549//ribonucleoside binding;GO:1901363//heterocyclic compound binding;GO:0016874//ligase activity;GO:0003824//catalytic activity;GO:0097159//organic cyclic compound binding;GO:0032550//purine …	GO:1901564//organonitrogen compound metabolic process;GO:0006091//generation of precursor metabolites and energy;GO:0071704//organic substance metabolic process;GO:0006779//porphyrin-containing compound biosynthetic process;GO:0044249//cellular biosynthetic process;GO:0044237//cellular metabolic process;GO:0046483//heterocycle metabolic process;GO:0051188//cofactor biosynthetic process;GO:0006725…
101244192	549	255	50.77	24.88	-1.02899	2.27e-21	1.22e-19	yes	XP_004240907.1	PREDICTED: protein trichome birefringence-like 33 [Solanum lycopersicum]	-	-	-	-	-	-	-
101244195	23	7	2.22	0.71	-1.64467	0.00817489	0.034609	yes	XP_010322877.1	PREDICTED: ribose-phosphate pyrophosphokinase 1-like [Solanum lycopersicum]	Metabolism	Nucleotide metabolism;Global and Overview;Carbohydrate metabolism	ko01200//Carbon metabolism;ko01230//Biosynthesis of amino acids;ko00230//Purine metabolism;ko00030//Pentose phosphate pathway	K00948	-	GO:0003824//catalytic activity;GO:0016772//transferase activity, transferring phosphorus-containing groups;GO:0016778//diphosphotransferase activity;GO:0005488//binding;GO:0046872//metal ion binding;GO:0043169//cation binding;GO:0016740//transferase activity;GO:0043167//ion binding	GO:0044238//primary metabolic process;GO:0009058//biosynthetic process;GO:0044699//single-organism process;GO:0044763//single-organism cellular process;GO:1901293//nucleoside phosphate biosynthetic process;GO:0006725//cellular aromatic compound metabolic process;GO:0055086//nucleobase-containing small molecule metabolic process;GO:0006753//nucleoside phosphate metabolic process;GO:0071704//organi…
101244211	24	100	3.47	15.27	2.13769	5.33e-13	1.4e-11	yes	XP_004244866.2	NIPA-like protein [Glycine soja]	-	-	-	-	-	-	-
101244229	40	5	4.66	0.61	-2.93345	1.45e-07	1.89e-06	yes	XP_004229701.1	PREDICTED: pentatricopeptide repeat-containing protein At1g06270 [Solanum lycopersicum]	-	-	-	-	GO:0009526//plastid envelope;GO:0044446//intracellular organelle part;GO:0044464//cell part;GO:0043226//organelle;GO:0009536//plastid;GO:0005737//cytoplasm;GO:0005622//intracellular;GO:0043227//membrane-bounded organelle;GO:0005623//cell;GO:0031975//envelope;GO:0043231//intracellular membrane-bounded organelle;GO:0044435//plastid part;GO:0044444//cytoplasmic part;GO:0031967//organelle envelope;GO…	-	-
101244232	65	139	3.14	7.08	1.17298	4.08e-08	5.84e-07	yes	XP_019071434.1	PREDICTED: G-type lectin S-receptor-like serine/threonine-protein kinase At4g27290-like [Solanum tuberosum]	-	-	-	-	-	GO:0032549//ribonucleoside binding;GO:0097159//organic cyclic compound binding;GO:0016773//phosphotransferase activity, alcohol group as acceptor;GO:0004672//protein kinase activity;GO:0016301//kinase activity;GO:1901363//heterocyclic compound binding;GO:0003824//catalytic activity;GO:0016740//transferase activity;GO:0001883//purine nucleoside binding;GO:0032550//purine ribonucleoside binding;GO:…	GO:0044699//single-organism process;GO:0008152//metabolic process;GO:0008037//cell recognition;GO:0043170//macromolecule metabolic process;GO:0006464//cellular protein modification process;GO:0071704//organic substance metabolic process;GO:0044237//cellular metabolic process;GO:0044238//primary metabolic process;GO:0006796//phosphate-containing compound metabolic process;GO:0044763//single-organi…
101244238	47	92	3.67	7.59	1.04832	4.18e-05	0.000352145	yes	XP_004231422.1	PREDICTED: protein TRANSPARENT TESTA 12-like [Solanum lycopersicum]	-	-	-	-	GO:0016020//membrane;GO:0044425//membrane part;GO:0031224//intrinsic component of membrane	GO:0022804//active transmembrane transporter activity;GO:0005215//transporter activity;GO:0015291//secondary active transmembrane transporter activity;GO:0022857//transmembrane transporter activity	GO:1902578//single-organism localization;GO:0006810//transport;GO:0044765//single-organism transport;GO:0050896//response to stimulus;GO:0051234//establishment of localization;GO:0009987//cellular process;GO:0015893//drug transport;GO:0051179//localization;GO:0042493//response to drug;GO:0042221//response to chemical;GO:0044763//single-organism cellular process;GO:0044699//single-organism process
101244266	17	34	0.46	0.97	1.07635	0.0110741	0.0443909	yes	XP_004252847.1	PREDICTED: pleiotropic drug resistance protein 1-like [Solanum lycopersicum]	-	-	-	-	GO:0044425//membrane part;GO:0016020//membrane;GO:0031224//intrinsic component of membrane	GO:0032549//ribonucleoside binding;GO:0017111//nucleoside-triphosphatase activity;GO:0016787//hydrolase activity;GO:0001882//nucleoside binding;GO:0032550//purine ribonucleoside binding;GO:0003824//catalytic activity;GO:0016818//hydrolase activity, acting on acid anhydrides, in phosphorus-containing anhydrides;GO:0001883//purine nucleoside binding;GO:0005488//binding;GO:0097367//carbohydrate deri…	GO:0051179//localization;GO:0051234//establishment of localization
101244279	48	16	8.15	2.87	-1.50575	0.00023202	0.00163297	yes	XP_010320027.1	PREDICTED: bidirectional sugar transporter SWEET1a-like isoform X1 [Solanum lycopersicum]	-	-	-	-	-	-	-
101244281	23	48	1.11	2.44	1.13632	0.00185416	0.00998698	yes	NP_001333998.1	Receptor protein kinase 4 [Theobroma cacao]	-	-	-	-	-	GO:0001883//purine nucleoside binding;GO:0003824//catalytic activity;GO:0016773//phosphotransferase activity, alcohol group as acceptor;GO:0016772//transferase activity, transferring phosphorus-containing groups;GO:0032549//ribonucleoside binding;GO:0016301//kinase activity;GO:0004672//protein kinase activity;GO:0097159//organic cyclic compound binding;GO:0001882//nucleoside binding;GO:0036094//s…	GO:0044237//cellular metabolic process;GO:0044260//cellular macromolecule metabolic process;GO:0036211//protein modification process;GO:0006796//phosphate-containing compound metabolic process;GO:0044238//primary metabolic process;GO:0009987//cellular process;GO:0006464//cellular protein modification process;GO:0008037//cell recognition;GO:0019538//protein metabolic process;GO:0008152//metabolic …
101244282	111	24	12.67	2.89	-2.13228	1.25e-13	3.47e-12	yes	XP_010320393.1	PREDICTED: jacalin-related lectin 3-like [Solanum lycopersicum]	-	-	-	-	-	-	-
101244300	25	132	4.42	24.65	2.47947	7.93e-20	3.8e-18	yes	XP_004243193.1	PREDICTED: probable glutathione S-transferase parA [Solanum lycopersicum]	Metabolism	Metabolism of other amino acids	ko00480//Glutathione metabolism	K00799	-	GO:0016846//carbon-sulfur lyase activity;GO:0016765//transferase activity, transferring alkyl or aryl (other than methyl) groups;GO:0016740//transferase activity;GO:0016829//lyase activity;GO:0003824//catalytic activity	-
101244307	87	171	6.37	13.2	1.05117	1.98e-08	2.96e-07	yes	NP_001307268.1	PREDICTED: cytokinin dehydrogenase 7-like [Solanum lycopersicum]	Metabolism	Metabolism of terpenoids and polyketides	ko00908//Zeatin biosynthesis	K00279	-	GO:0016491//oxidoreductase activity;GO:0005488//binding;GO:0036094//small molecule binding;GO:0003824//catalytic activity;GO:0016614//oxidoreductase activity, acting on CH-OH group of donors;GO:0097159//organic cyclic compound binding;GO:0016616//oxidoreductase activity, acting on the CH-OH group of donors, NAD or NADP as acceptor;GO:1901265//nucleoside phosphate binding;GO:0016645//oxidoreductas…	GO:0008152//metabolic process;GO:0044699//single-organism process;GO:0044710//single-organism metabolic process;GO:0034754//cellular hormone metabolic process;GO:0009308//amine metabolic process;GO:0009987//cellular process;GO:0071704//organic substance metabolic process;GO:0065008//regulation of biological quality;GO:0006807//nitrogen compound metabolic process;GO:0009690//cytokinin metabolic pr…
101244335	91	190	13.03	28.69	1.13871	3.31e-10	6.26e-09	yes	XP_004232361.1	PREDICTED: LOB domain-containing protein 40 [Solanum lycopersicum]	-	-	-	-	-	-	-
101244353	44	19	5.56	2.53	-1.13595	0.00522183	0.0241096	yes	XP_019066887.1	PREDICTED: probable glycosyltransferase At5g03795 [Solanum lycopersicum]	-	-	-	-	-	GO:0003824//catalytic activity;GO:0016740//transferase activity	-
101244385	24	51	2.76	6.2	1.1676	0.0011026	0.00638716	yes	XP_004241972.1	PREDICTED: NAC domain-containing protein 86-like [Solanum lycopersicum]	-	-	-	-	GO:0005622//intracellular;GO:0043229//intracellular organelle;GO:0005623//cell;GO:0043226//organelle;GO:0043231//intracellular membrane-bounded organelle;GO:0044424//intracellular part;GO:0044464//cell part;GO:0043227//membrane-bounded organelle	GO:0097159//organic cyclic compound binding;GO:1901363//heterocyclic compound binding;GO:0003676//nucleic acid binding;GO:0005488//binding	GO:0009987//cellular process;GO:1901576//organic substance biosynthetic process;GO:0010468//regulation of gene expression;GO:0043170//macromolecule metabolic process;GO:0044237//cellular metabolic process;GO:0019222//regulation of metabolic process;GO:0009059//macromolecule biosynthetic process;GO:0044249//cellular biosynthetic process;GO:0071704//organic substance metabolic process;GO:0050789//r…
101244399	3	16	0.26	1.49	2.51873	0.00444281	0.0210029	yes	NP_001316135.1	PREDICTED: protein ASPARTIC PROTEASE IN GUARD CELL 1-like [Solanum lycopersicum]	-	-	-	-	-	GO:0070011//peptidase activity, acting on L-amino acid peptides;GO:0008233//peptidase activity;GO:0004175//endopeptidase activity;GO:0003824//catalytic activity;GO:0016787//hydrolase activity	GO:0019538//protein metabolic process;GO:0071704//organic substance metabolic process;GO:0008152//metabolic process;GO:0043170//macromolecule metabolic process;GO:0044238//primary metabolic process
101244426	46	15	7.65	2.63	-1.5404	0.000269861	0.00186138	yes	XP_004230971.1	BnaA07g12620D [Brassica napus]	-	-	-	-	-	-	-
101244431	46	15	1.5	0.44	-1.76939	0.000269861	0.00186138	yes	XP_010315608.1	PREDICTED: B3 domain-containing protein LOC_Os12g40080-like isoform X1 [Nicotiana tomentosiformis]	-	-	-	-	-	-	-
101244473	111	45	16.19	6.92	-1.22626	1.16e-06	1.31e-05	yes	XP_004236185.1	PREDICTED: short-chain dehydrogenase reductase 3b-like [Solanum lycopersicum]	-	-	-	-	-	GO:0003824//catalytic activity	GO:0044710//single-organism metabolic process;GO:0044699//single-organism process;GO:0008152//metabolic process
101244513	18.94	45.53	5.31	13.46	1.34189	0.00043108	0.00281204	yes	XP_004245728.1	PREDICTED: 14 kDa proline-rich protein DC2.15-like [Solanum lycopersicum]	-	-	-	-	-	-	-
101244560	48	13	3.42	0.98	-1.80314	2.79e-05	0.000244162	yes	NP_001287653.1	D-xylose-proton symporter-like 3, chloroplastic-like [Solanum lycopersicum]	-	-	-	-	GO:0031224//intrinsic component of membrane;GO:0005737//cytoplasm;GO:0031975//envelope;GO:0031090//organelle membrane;GO:0016020//membrane;GO:0044435//plastid part;GO:0042170//plastid membrane;GO:0044424//intracellular part;GO:0031967//organelle envelope;GO:0044446//intracellular organelle part;GO:0044464//cell part;GO:0043229//intracellular organelle;GO:0043226//organelle;GO:0043231//intracellul…	GO:0005215//transporter activity;GO:0022857//transmembrane transporter activity	GO:0051179//localization;GO:1902578//single-organism localization;GO:0044763//single-organism cellular process;GO:0008152//metabolic process;GO:0044237//cellular metabolic process;GO:0044765//single-organism transport;GO:0009987//cellular process;GO:0044699//single-organism process;GO:0006810//transport;GO:0051234//establishment of localization;GO:0006091//generation of precursor metabolites and …
101244562	17	278	3.31	57.1	4.10859	8.94e-65	2.93e-62	yes	XP_004235492.2	PREDICTED: kunitz-type trypsin inhibitor alpha chain-like [Solanum lycopersicum]	-	-	-	-	-	GO:0061134//peptidase regulator activity;GO:0061135//endopeptidase regulator activity;GO:0030234//enzyme regulator activity;GO:0098772//molecular function regulator	GO:0032269//negative regulation of cellular protein metabolic process;GO:0050789//regulation of biological process;GO:0048523//negative regulation of cellular process;GO:0010605//negative regulation of macromolecule metabolic process;GO:0030162//regulation of proteolysis;GO:0051246//regulation of protein metabolic process;GO:0032268//regulation of cellular protein metabolic process;GO:0050790//re…
101244582	96	190	13.21	27.58	1.06199	3.18e-09	5.33e-08	yes	NP_001316452.1	PREDICTED: NAC transcription factor 29 [Solanum lycopersicum]	-	-	-	-	GO:0044464//cell part;GO:0043229//intracellular organelle;GO:0005623//cell;GO:0044424//intracellular part;GO:0043226//organelle;GO:0005622//intracellular;GO:0043227//membrane-bounded organelle;GO:0043231//intracellular membrane-bounded organelle	GO:0097159//organic cyclic compound binding;GO:1901363//heterocyclic compound binding;GO:0003676//nucleic acid binding;GO:0005488//binding;GO:0001071//nucleic acid binding transcription factor activity	GO:0040007//growth;GO:0032502//developmental process;GO:0032501//multicellular organismal process;GO:0043170//macromolecule metabolic process;GO:0090567//reproductive shoot system development;GO:0061458//reproductive system development;GO:0048513//animal organ development;GO:0060255//regulation of macromolecule metabolic process;GO:0044260//cellular macromolecule metabolic process;GO:0044767//sin…
101244638	126	244	7.95	16.24	1.03052	4.4e-11	9.36e-10	yes	XP_004233680.2	BnaCnng29140D [Brassica napus]	-	-	-	-	GO:0044424//intracellular part;GO:1990904//ribonucleoprotein complex;GO:0005623//cell;GO:0044464//cell part;GO:0005622//intracellular;GO:0032991//macromolecular complex;GO:0030529//intracellular ribonucleoprotein complex	GO:0005198//structural molecule activity	GO:0071704//organic substance metabolic process;GO:0043170//macromolecule metabolic process;GO:0010467//gene expression;GO:0008152//metabolic process
101244641	8	0	3.24	0.001	-11.6618	0.00782344	0.0335277	yes	XP_004251840.1	BnaC07g04020D [Brassica napus]	-	-	-	-	-	-	-
101244652	11	45	2.69	11.63	2.11217	3.41e-06	3.55e-05	yes	XP_004253021.1	PREDICTED: pathogenesis-related protein STH-2-like [Solanum lycopersicum]	-	-	-	-	-	-	GO:0050896//response to stimulus;GO:0006950//response to stress
101244669	17	68	0.92	3.9	2.08377	5.62e-09	9.04e-08	yes	XP_010321519.1	PREDICTED: cyclic nucleotide-gated ion channel 1-like [Solanum lycopersicum]	Organismal Systems	Environmental adaptation	ko04626//Plant-pathogen interaction	K05391	GO:0016020//membrane;GO:0031224//intrinsic component of membrane;GO:0044425//membrane part	GO:0015075//ion transmembrane transporter activity;GO:0005215//transporter activity;GO:0022857//transmembrane transporter activity;GO:0022892//substrate-specific transporter activity;GO:0022891//substrate-specific transmembrane transporter activity	GO:1902578//single-organism localization;GO:0044763//single-organism cellular process;GO:0006810//transport;GO:0006811//ion transport;GO:0009987//cellular process;GO:0044765//single-organism transport;GO:0051179//localization;GO:0044699//single-organism process;GO:0051234//establishment of localization
101244708	51	24	6.18	3.08	-1.00468	0.00531213	0.0244659	yes	NP_001332946.1	PREDICTED: protein FLUORESCENT IN BLUE LIGHT, chloroplastic-like isoform X1 [Solanum lycopersicum]	-	-	-	-	-	-	-
101244709	16	4	3.44	0.91	-1.91847	0.0118586	0.0467902	yes	XP_004247563.1	PREDICTED: preprotein translocase subunit SECE1 [Solanum lycopersicum]	-	-	-	-	GO:0044464//cell part;GO:0044425//membrane part;GO:0044444//cytoplasmic part;GO:0044424//intracellular part;GO:0043231//intracellular membrane-bounded organelle;GO:0016020//membrane;GO:0044435//plastid part;GO:0044434//chloroplast part;GO:0043227//membrane-bounded organelle;GO:0005623//cell;GO:0043229//intracellular organelle;GO:0009507//chloroplast;GO:0031224//intrinsic component of membrane;GO:…	GO:0008320//protein transmembrane transporter activity;GO:0022884//macromolecule transmembrane transporter activity;GO:0022892//substrate-specific transporter activity;GO:0022891//substrate-specific transmembrane transporter activity;GO:0005215//transporter activity;GO:0008565//protein transporter activity;GO:0022857//transmembrane transporter activity	GO:0045184//establishment of protein localization;GO:0034613//cellular protein localization;GO:0006886//intracellular protein transport;GO:0051641//cellular localization;GO:0051234//establishment of localization;GO:0033036//macromolecule localization;GO:0070727//cellular macromolecule localization;GO:0015031//protein transport;GO:0046907//intracellular transport;GO:0008104//protein localization;G…
101244747	4	16	1.19	5.02	2.07673	0.0118586	0.0467902	yes	XP_004234373.1	C5a peptidase [Gossypium arboreum]	-	-	-	-	-	-	-
101244748	1	11	0.15	1.76	3.55254	0.00636217	0.0283546	yes	XP_010317741.2	PREDICTED: thaumatin-like protein 1b, partial [Solanum lycopersicum]	-	-	-	-	-	-	-
101244774	80	35	9.53	4.4	-1.11497	0.000108964	0.000834463	yes	XP_004240748.1	PREDICTED: probable carboxylesterase 120 [Solanum lycopersicum]	-	-	-	-	-	GO:0003824//catalytic activity	-
101244796	14	33	2.03	5.04	1.31194	0.0055707	0.0254456	yes	XP_004245813.2	PREDICTED: LOW QUALITY PROTEIN: zeaxanthin epoxidase, chloroplastic-like [Solanum lycopersicum]	-	-	-	-	-	GO:0016491//oxidoreductase activity;GO:0003824//catalytic activity	GO:0044699//single-organism process;GO:0008152//metabolic process;GO:0044710//single-organism metabolic process
101244813	19	4	4.93	1.1	-2.16408	0.00261354	0.0133527	yes	XP_004230799.1	PREDICTED: atherin-like [Phoenix dactylifera]	-	-	-	-	-	GO:0005488//binding;GO:1901363//heterocyclic compound binding;GO:0097159//organic cyclic compound binding	-
101244822	12	0	0.51	0.001	-8.99435	0.000489894	0.00315357	yes	XP_004249562.1	PREDICTED: WD repeat-containing protein 44-like [Solanum lycopersicum]	-	-	-	-	-	-	-
101244868	335	109	8.63	2.96	-1.54376	7.09e-25	4.61e-23	yes	XP_010320397.1	PREDICTED: auxilin-like protein 1 [Solanum lycopersicum]	-	-	-	-	-	-	-
101244882	108	42	25.64	10.52	-1.28526	4.84e-07	5.82e-06	yes	XP_004241973.1	PREDICTED: glycine cleavage system H protein, mitochondrial [Solanum lycopersicum]	Metabolism	Amino acid metabolism;Carbohydrate metabolism	ko00630//Glyoxylate and dicarboxylate metabolism;ko00260//Glycine, serine and threonine metabolism	K02437	GO:0044424//intracellular part;GO:0005622//intracellular;GO:0005623//cell;GO:0005737//cytoplasm;GO:0044444//cytoplasmic part;GO:0044464//cell part	-	GO:0044281//small molecule metabolic process;GO:1901565//organonitrogen compound catabolic process;GO:1901564//organonitrogen compound metabolic process;GO:0009987//cellular process;GO:0016054//organic acid catabolic process;GO:0044699//single-organism process;GO:0071704//organic substance metabolic process;GO:1901605//alpha-amino acid metabolic process;GO:1901575//organic substance catabolic pro…
101244883	194.45	80	9.78	4.27	-1.1956	1.08e-10	2.17e-09	yes	XP_010322673.1	PREDICTED: sister chromatid cohesion protein PDS5 homolog A-like [Solanum lycopersicum]	-	-	-	-	-	-	GO:0009987//cellular process
101244887	45	21	3.48	1.71	-1.02509	0.00932491	0.0384839	yes	XP_004243521.1	PREDICTED: endoglucanase 11 [Solanum lycopersicum]	-	-	-	-	-	GO:0016798//hydrolase activity, acting on glycosyl bonds;GO:0016787//hydrolase activity;GO:0004553//hydrolase activity, hydrolyzing O-glycosyl compounds;GO:0003824//catalytic activity	GO:0006073//cellular glucan metabolic process;GO:0071704//organic substance metabolic process;GO:0044262//cellular carbohydrate metabolic process;GO:0044264//cellular polysaccharide metabolic process;GO:0043170//macromolecule metabolic process;GO:0044260//cellular macromolecule metabolic process;GO:0044237//cellular metabolic process;GO:0030243//cellulose metabolic process;GO:0044042//glucan meta…
101244923	86	32	15.43	6.06	-1.34835	2.85e-06	3.01e-05	yes	XP_004232858.1	PREDICTED: tetraspanin-19 [Solanum lycopersicum]	-	-	-	-	GO:0044425//membrane part;GO:0031224//intrinsic component of membrane;GO:0016020//membrane	-	-
101244926	186	74	5.81	2.44	-1.25166	7.44e-11	1.54e-09	yes	XP_004233681.1	PREDICTED: structural maintenance of chromosomes protein 4 [Solanum lycopersicum]	-	-	-	-	GO:0043232//intracellular non-membrane-bounded organelle;GO:0044424//intracellular part;GO:0005622//intracellular;GO:0043231//intracellular membrane-bounded organelle;GO:0043228//non-membrane-bounded organelle;GO:0043227//membrane-bounded organelle;GO:0005623//cell;GO:0043226//organelle;GO:0044464//cell part;GO:0043229//intracellular organelle	GO:1901363//heterocyclic compound binding;GO:0097159//organic cyclic compound binding;GO:0032549//ribonucleoside binding;GO:0036094//small molecule binding;GO:0032550//purine ribonucleoside binding;GO:0005488//binding;GO:0001883//purine nucleoside binding;GO:0097367//carbohydrate derivative binding;GO:0001882//nucleoside binding	GO:0090304//nucleic acid metabolic process;GO:0006725//cellular aromatic compound metabolic process;GO:0044237//cellular metabolic process;GO:0071704//organic substance metabolic process;GO:0008152//metabolic process;GO:0044238//primary metabolic process;GO:0007059//chromosome segregation;GO:0016043//cellular component organization;GO:0043170//macromolecule metabolic process;GO:0006259//DNA metab…
101244930	21	6	1.85	0.56	-1.72403	0.00595708	0.0268646	yes	XP_010317465.1	PREDICTED: protein TPX2-like isoform X1 [Solanum lycopersicum]	-	-	-	-	GO:0043229//intracellular organelle;GO:0005623//cell;GO:0005622//intracellular;GO:0015630//microtubule cytoskeleton;GO:0005856//cytoskeleton;GO:0044424//intracellular part;GO:0043226//organelle;GO:0043228//non-membrane-bounded organelle;GO:0044464//cell part;GO:0043232//intracellular non-membrane-bounded organelle	-	GO:0071840//cellular component organization or biogenesis;GO:0009987//cellular process;GO:0000280//nuclear division;GO:0016043//cellular component organization;GO:0006996//organelle organization;GO:0048285//organelle fission
101244948	70	30	4.21	1.9	-1.14782	0.000264295	0.00183036	yes	XP_004237354.1	PREDICTED: probable methyltransferase PMT10 [Solanum lycopersicum]	-	-	-	-	-	-	-
101244962	2861	1304	314.66	151.32	-1.05619	5.86e-99	3.73e-96	yes	XP_004241384.1	PREDICTED: hyoscyamine 6-dioxygenase-like [Solanum lycopersicum]	-	-	-	-	-	GO:0005488//binding;GO:0016491//oxidoreductase activity;GO:0043167//ion binding;GO:0043169//cation binding;GO:0016705//oxidoreductase activity, acting on paired donors, with incorporation or reduction of molecular oxygen;GO:0051213//dioxygenase activity;GO:0003824//catalytic activity	GO:0044710//single-organism metabolic process;GO:0008152//metabolic process;GO:0044699//single-organism process
101244973	37	159	0.88	4	2.18442	1.48e-20	7.48e-19	yes	XP_019070305.1	PREDICTED: G-type lectin S-receptor-like serine/threonine-protein kinase SD1-1 isoform X3 [Prunus mume]	-	-	-	-	-	GO:0016740//transferase activity;GO:0016772//transferase activity, transferring phosphorus-containing groups;GO:0003824//catalytic activity	-
101245024	20	4	1.83	0.39	-2.2303	0.0015534	0.00860077	yes	XP_010316039.1	PREDICTED: DUF21 domain-containing protein At2g14520-like [Solanum lycopersicum]	-	-	-	-	-	-	-
101245061	408	113	40.42	11.81	-1.77506	7.59e-36	9.12e-34	yes	XP_004239898.1	PREDICTED: chalcone synthase B [Solanum lycopersicum]	Organismal Systems;Metabolism	Environmental adaptation;Biosynthesis of other secondary metabolites	ko00941//Flavonoid biosynthesis;ko04712//Circadian rhythm - plant	K00660	-	GO:0016747//transferase activity, transferring acyl groups other than amino-acyl groups;GO:0016746//transferase activity, transferring acyl groups;GO:0016740//transferase activity;GO:0003824//catalytic activity	GO:0008152//metabolic process;GO:0009812//flavonoid metabolic process;GO:0071704//organic substance metabolic process
101245096	79	23	8.71	2.68	-1.70044	1.27e-07	1.67e-06	yes	XP_004229624.1	PREDICTED: transcription factor MYB46-like [Solanum lycopersicum]	-	-	-	-	-	GO:0005488//binding;GO:0097159//organic cyclic compound binding;GO:0003676//nucleic acid binding;GO:0001071//nucleic acid binding transcription factor activity;GO:1901363//heterocyclic compound binding	GO:0009834//plant-type secondary cell wall biogenesis;GO:0050794//regulation of cellular process;GO:0065007//biological regulation;GO:2001141//regulation of RNA biosynthetic process;GO:2000112//regulation of cellular macromolecule biosynthetic process;GO:0009889//regulation of biosynthetic process;GO:0010556//regulation of macromolecule biosynthetic process;GO:0019219//regulation of nucleobase-co…
101245149	378	152	14	5.94	-1.23689	3.18e-20	1.58e-18	yes	XP_004236950.1	PREDICTED: phosphoenolpyruvate carboxylase 4 [Solanum lycopersicum]	Metabolism	Global and Overview;Energy metabolism;Carbohydrate metabolism	ko01200//Carbon metabolism;ko00620//Pyruvate metabolism;ko00710//Carbon fixation in photosynthetic organisms	K01595	GO:0005622//intracellular;GO:0005623//cell;GO:0044464//cell part;GO:0044424//intracellular part	GO:0016830//carbon-carbon lyase activity;GO:0004611//phosphoenolpyruvate carboxykinase activity;GO:0003824//catalytic activity;GO:0016831//carboxy-lyase activity;GO:0016829//lyase activity	GO:0044699//single-organism process;GO:0044763//single-organism cellular process;GO:0006082//organic acid metabolic process;GO:0044281//small molecule metabolic process;GO:0044710//single-organism metabolic process;GO:0006101//citrate metabolic process;GO:0072350//tricarboxylic acid metabolic process;GO:0043436//oxoacid metabolic process;GO:0008152//metabolic process;GO:0019752//carboxylic acid m…
101245157	121	288	14.45	36.29	1.3285	1.71e-18	7.25e-17	yes	NP_001333113.1	PREDICTED: probable isoaspartyl peptidase/L-asparaginase 2 [Solanum lycopersicum]	-	-	-	-	-	GO:0008242//omega peptidase activity;GO:0070011//peptidase activity, acting on L-amino acid peptides;GO:0008233//peptidase activity;GO:0016811//hydrolase activity, acting on carbon-nitrogen (but not peptide) bonds, in linear amides;GO:0003824//catalytic activity;GO:0016787//hydrolase activity;GO:0016810//hydrolase activity, acting on carbon-nitrogen (but not peptide) bonds;GO:0008238//exopeptidas…	GO:0071704//organic substance metabolic process;GO:0008152//metabolic process;GO:0019538//protein metabolic process;GO:0043170//macromolecule metabolic process;GO:0044238//primary metabolic process
101245181	271	586	43.6	99.47	1.18993	4.4e-30	3.97e-28	yes	XP_004243196.1	PREDICTED: probable glutathione S-transferase [Solanum lycopersicum]	Metabolism	Metabolism of other amino acids	ko00480//Glutathione metabolism	K00799	-	GO:0016765//transferase activity, transferring alkyl or aryl (other than methyl) groups;GO:0016740//transferase activity;GO:0003824//catalytic activity;GO:0016209//antioxidant activity	GO:0071495//cellular response to endogenous stimulus;GO:0065007//biological regulation;GO:0044700//single organism signaling;GO:0009987//cellular process;GO:0042221//response to chemical;GO:0009719//response to endogenous stimulus;GO:0007154//cell communication;GO:0071310//cellular response to organic substance;GO:0051716//cellular response to stimulus;GO:0044699//single-organism process;GO:00708…
101245195	15	0	4.26	0.001	-12.0566	6.14e-05	0.000497516	yes	XP_004246568.1	BnaAnng16530D [Brassica napus]	-	-	-	-	-	-	GO:0006091//generation of precursor metabolites and energy;GO:0015980//energy derivation by oxidation of organic compounds;GO:0044699//single-organism process;GO:0008152//metabolic process;GO:0009987//cellular process;GO:0050896//response to stimulus;GO:0044237//cellular metabolic process;GO:0044763//single-organism cellular process;GO:0045333//cellular respiration;GO:0055114//oxidation-reduction…
101245212	9	0	0.58	0.001	-9.17991	0.00391328	0.0188664	yes	NP_001295307.1	(-)-camphene/tricyclene synthase, chloroplastic [Solanum lycopersicum]	-	-	-	-	-	GO:0043167//ion binding;GO:0016829//lyase activity;GO:0046872//metal ion binding;GO:0003824//catalytic activity;GO:0043169//cation binding;GO:0005488//binding	GO:0044237//cellular metabolic process;GO:0009987//cellular process;GO:0044238//primary metabolic process;GO:0044699//single-organism process;GO:0016098//monoterpenoid metabolic process;GO:0006720//isoprenoid metabolic process;GO:0071704//organic substance metabolic process;GO:0044255//cellular lipid metabolic process;GO:0008152//metabolic process;GO:0006629//lipid metabolic process;GO:0044710//s…
101245220	175	56	13.71	4.63	-1.56614	5.51e-14	1.57e-12	yes	NP_001304751.1	PREDICTED: 3-ketoacyl-CoA synthase 6 [Solanum lycopersicum]	Metabolism	Lipid metabolism	ko00062//Fatty acid elongation	K15397	-	GO:0003824//catalytic activity;GO:0016740//transferase activity;GO:0016746//transferase activity, transferring acyl groups	GO:0008152//metabolic process;GO:0043436//oxoacid metabolic process;GO:0044255//cellular lipid metabolic process;GO:0009987//cellular process;GO:0044237//cellular metabolic process;GO:0071704//organic substance metabolic process;GO:0044238//primary metabolic process;GO:0006082//organic acid metabolic process;GO:0044699//single-organism process;GO:0044763//single-organism cellular process;GO:00327…
101245226	26	59	2.64	6.31	1.2571	0.000192619	0.00138956	yes	XP_004233682.1	PREDICTED: protein FEZ-like [Solanum tuberosum]	-	-	-	-	GO:0044464//cell part;GO:0043231//intracellular membrane-bounded organelle;GO:0043227//membrane-bounded organelle;GO:0043226//organelle;GO:0005623//cell;GO:0043229//intracellular organelle;GO:0005622//intracellular;GO:0044424//intracellular part	GO:0005488//binding;GO:0097159//organic cyclic compound binding;GO:0003676//nucleic acid binding;GO:1901363//heterocyclic compound binding	GO:0009987//cellular process;GO:0050789//regulation of biological process;GO:0008152//metabolic process;GO:0010468//regulation of gene expression;GO:0044237//cellular metabolic process;GO:0019222//regulation of metabolic process;GO:0009058//biosynthetic process;GO:0044260//cellular macromolecule metabolic process;GO:0060255//regulation of macromolecule metabolic process;GO:0043170//macromolecule …
101245233	22	79	3.37	12.78	1.92307	1.87e-09	3.26e-08	yes	NP_001333764.1	PREDICTED: transcription factor WER-like [Solanum lycopersicum]	-	-	-	-	-	GO:0005488//binding;GO:0097159//organic cyclic compound binding;GO:1901363//heterocyclic compound binding;GO:0003676//nucleic acid binding	-
101245241	53	25	3.14	1.56	-1.00922	0.00441012	0.0209077	yes	XP_004253108.2	PREDICTED: protein NRT1/ PTR FAMILY 1.2-like isoform X1 [Solanum lycopersicum]	-	-	-	-	GO:0031224//intrinsic component of membrane;GO:0044425//membrane part;GO:0016020//membrane	-	GO:0006810//transport;GO:0051179//localization;GO:0051234//establishment of localization
101245253	810	372	119.46	57.88	-1.04539	4.03e-31	3.79e-29	yes	XP_004238980.1	PREDICTED: lysine-rich arabinogalactan protein 19 [Solanum lycopersicum]	-	-	-	-	-	-	-
101245261	336	123	24.05	9.29	-1.37229	7.01e-21	3.61e-19	yes	XP_004241385.1	PREDICTED: cytochrome P450 82C2-like [Solanum lycopersicum]	-	-	-	-	-	GO:0046872//metal ion binding;GO:0005488//binding;GO:0046914//transition metal ion binding;GO:0016491//oxidoreductase activity;GO:0046906//tetrapyrrole binding;GO:1901363//heterocyclic compound binding;GO:0097159//organic cyclic compound binding;GO:0043167//ion binding;GO:0043169//cation binding;GO:0003824//catalytic activity	GO:0044699//single-organism process;GO:0008152//metabolic process;GO:0044710//single-organism metabolic process
101245281	76	24	14.72	4.9	-1.58692	9.03e-07	1.03e-05	yes	XP_004228703.1	PREDICTED: probable peroxygenase 5 [Solanum lycopersicum]	Metabolism	Lipid metabolism	ko00073//Cutin, suberine and wax biosynthesis	K17991	-	-	-
101245299	72	23	3.78	1.27	-1.57356	2.32e-06	2.48e-05	yes	XP_004248560.1	PREDICTED: transketolase, chloroplastic [Solanum lycopersicum]	Metabolism	Global and Overview;Energy metabolism;Carbohydrate metabolism	ko01200//Carbon metabolism;ko01230//Biosynthesis of amino acids;ko00710//Carbon fixation in photosynthetic organisms;ko00030//Pentose phosphate pathway	K00615	GO:0044424//intracellular part;GO:0005623//cell;GO:0043231//intracellular membrane-bounded organelle;GO:0009507//chloroplast;GO:0044435//plastid part;GO:0044422//organelle part;GO:0044446//intracellular organelle part;GO:0009536//plastid;GO:0044464//cell part;GO:0044444//cytoplasmic part;GO:0005622//intracellular;GO:0005737//cytoplasm;GO:0043229//intracellular organelle;GO:0043226//organelle;GO:0…	GO:0016744//transferase activity, transferring aldehyde or ketonic groups;GO:0016740//transferase activity;GO:0043167//ion binding;GO:0005488//binding;GO:0003824//catalytic activity;GO:0043169//cation binding	GO:0044710//single-organism metabolic process;GO:0015977//carbon fixation;GO:0071704//organic substance metabolic process;GO:0008152//metabolic process;GO:0044699//single-organism process
101245304	25	8	0.9	0.3	-1.58496	0.00704452	0.0308681	yes	XP_010313256.2	PREDICTED: LOW QUALITY PROTEIN: phospholipase D p1 [Solanum lycopersicum]	Cellular Processes;Metabolism	Transport and catabolism;Lipid metabolism	ko04144//Endocytosis;ko00564//Glycerophospholipid metabolism;ko00565//Ether lipid metabolism	K01115	GO:0044424//intracellular part;GO:0043227//membrane-bounded organelle;GO:0005622//intracellular;GO:0043226//organelle;GO:0005623//cell;GO:0043229//intracellular organelle;GO:0044464//cell part;GO:0043231//intracellular membrane-bounded organelle	GO:0005488//binding;GO:0016788//hydrolase activity, acting on ester bonds;GO:0016787//hydrolase activity;GO:0008289//lipid binding;GO:0016298//lipase activity;GO:0003824//catalytic activity;GO:0004620//phospholipase activity	GO:0006664//glycolipid metabolic process;GO:0009267//cellular response to starvation;GO:0044242//cellular lipid catabolic process;GO:0009058//biosynthetic process;GO:0044237//cellular metabolic process;GO:0023052//signaling;GO:0019538//protein metabolic process;GO:0009719//response to endogenous stimulus;GO:0050896//response to stimulus;GO:0019219//regulation of nucleobase-containing compound met…
101245329	124	320	20.03	54.54	1.44515	8.91e-23	5.15e-21	yes	XP_004251507.1	PREDICTED: cysteine-rich repeat secretory protein 38 [Solanum lycopersicum]	-	-	-	-	-	-	-
101245349	107	36	15.32	5.44	-1.49374	1.11e-08	1.72e-07	yes	XP_004236697.1	PREDICTED: transcription factor bHLH30-like [Solanum lycopersicum]	-	-	-	-	-	GO:0005488//binding;GO:0005515//protein binding	-
101245357	22	48	1.61	3.71	1.20436	0.00111498	0.0064451	yes	XP_010320742.1	Class I glutamine amidotransferase-like superfamily protein [Theobroma cacao]	-	-	-	-	-	GO:0003824//catalytic activity	GO:0044281//small molecule metabolic process;GO:0044238//primary metabolic process;GO:1901605//alpha-amino acid metabolic process;GO:0044763//single-organism cellular process;GO:0006807//nitrogen compound metabolic process;GO:0043436//oxoacid metabolic process;GO:0008152//metabolic process;GO:0044699//single-organism process;GO:0009064//glutamine family amino acid metabolic process;GO:0006082//or…
101245380	38	16	4.48	1.99	-1.17073	0.00916558	0.0380003	yes	XP_004244025.1	PREDICTED: E3 ubiquitin-protein ligase At1g63170-like [Solanum lycopersicum]	-	-	-	-	-	GO:0046914//transition metal ion binding;GO:0043169//cation binding;GO:0046872//metal ion binding;GO:0005488//binding;GO:0043167//ion binding	-
101245480	3	16	0.23	1.31	2.50986	0.00444281	0.0210029	yes	XP_004245136.1	PREDICTED: ATP-dependent 6-phosphofructokinase 6 [Solanum lycopersicum]	Genetic Information Processing;Metabolism	Global and Overview;Folding, sorting and degradation;Carbohydrate metabolism	ko01200//Carbon metabolism;ko01230//Biosynthesis of amino acids;ko00010//Glycolysis / Gluconeogenesis;ko03018//RNA degradation;ko00051//Fructose and mannose metabolism;ko00052//Galactose metabolism;ko00030//Pentose phosphate pathway	K00850	-	GO:0008443//phosphofructokinase activity;GO:0032549//ribonucleoside binding;GO:0001882//nucleoside binding;GO:0005488//binding;GO:0016301//kinase activity;GO:0001883//purine nucleoside binding;GO:0016772//transferase activity, transferring phosphorus-containing groups;GO:0016773//phosphotransferase activity, alcohol group as acceptor;GO:0036094//small molecule binding;GO:1901363//heterocyclic com…	GO:0032787//monocarboxylic acid metabolic process;GO:0016310//phosphorylation;GO:0044237//cellular metabolic process;GO:0044699//single-organism process;GO:0006793//phosphorus metabolic process;GO:0071704//organic substance metabolic process;GO:0019752//carboxylic acid metabolic process;GO:0044763//single-organism cellular process;GO:0009987//cellular process;GO:0006082//organic acid metabolic pr…
101245519	1	25	0.08	2.04	4.67243	8.16e-07	9.4e-06	yes	XP_004232860.1	PREDICTED: allantoinase [Solanum lycopersicum]	Metabolism	Nucleotide metabolism	ko00230//Purine metabolism	K01466	GO:0044424//intracellular part;GO:0043227//membrane-bounded organelle;GO:0005623//cell;GO:0044464//cell part;GO:0005622//intracellular;GO:0043231//intracellular membrane-bounded organelle;GO:0043226//organelle;GO:0043229//intracellular organelle	GO:0046872//metal ion binding;GO:0043167//ion binding;GO:0005488//binding;GO:0016812//hydrolase activity, acting on carbon-nitrogen (but not peptide) bonds, in cyclic amides;GO:0016810//hydrolase activity, acting on carbon-nitrogen (but not peptide) bonds;GO:0016787//hydrolase activity;GO:0003824//catalytic activity;GO:0046914//transition metal ion binding;GO:0043169//cation binding	GO:0071704//organic substance metabolic process;GO:1901564//organonitrogen compound metabolic process;GO:0008152//metabolic process;GO:0043603//cellular amide metabolic process;GO:0010135//ureide metabolic process;GO:0006807//nitrogen compound metabolic process;GO:0009987//cellular process;GO:0034641//cellular nitrogen compound metabolic process;GO:0044237//cellular metabolic process;GO:0046483//…
101245523	196	91	23.05	11.29	-1.02972	1.19e-08	1.83e-07	yes	XP_004234156.2	hydroxyproline-rich glycoprotein [Populus trichocarpa]	-	-	-	-	-	-	-
101245554	96	12	21.48	2.83	-2.92412	3.03e-16	1.08e-14	yes	XP_004241470.1	PREDICTED: CASP-like protein 4D1 [Solanum lycopersicum]	-	-	-	-	GO:0031224//intrinsic component of membrane;GO:0044425//membrane part;GO:0016020//membrane	-	-
101245583	37	16	10.83	4.94	-1.13245	0.0127768	0.0497598	yes	XP_004247215.1	PREDICTED: photosystem II reaction center W protein, chloroplastic-like [Solanum lycopersicum]	-	-	-	-	GO:0009579//thylakoid;GO:0043231//intracellular membrane-bounded organelle;GO:0044444//cytoplasmic part;GO:0005622//intracellular;GO:0005623//cell;GO:0044424//intracellular part;GO:0043227//membrane-bounded organelle;GO:0034357//photosynthetic membrane;GO:0044436//thylakoid part;GO:0009536//plastid;GO:0032991//macromolecular complex;GO:0043229//intracellular organelle;GO:0009521//photosystem;GO:0…	-	GO:0009987//cellular process;GO:0008152//metabolic process;GO:0044237//cellular metabolic process
101245593	239	111	42.68	20.92	-1.02868	3.42e-10	6.45e-09	yes	XP_004230638.1	PREDICTED: vacuolar iron transporter homolog 4-like [Solanum lycopersicum]	-	-	-	-	-	-	-
101245610	69	30	7.72	3.54	-1.12485	0.0003663	0.00243323	yes	XP_004232949.1	PREDICTED: peroxidase 19 [Solanum lycopersicum]	Metabolism	Biosynthesis of other secondary metabolites	ko00940//Phenylpropanoid biosynthesis	K00430	-	GO:0016209//antioxidant activity;GO:0005488//binding;GO:0003824//catalytic activity;GO:0043169//cation binding;GO:0043167//ion binding;GO:0046906//tetrapyrrole binding;GO:1901363//heterocyclic compound binding;GO:0097159//organic cyclic compound binding	GO:0072593//reactive oxygen species metabolic process;GO:0044237//cellular metabolic process;GO:0042743//hydrogen peroxide metabolic process;GO:0050896//response to stimulus;GO:0044699//single-organism process;GO:0006950//response to stress;GO:0008152//metabolic process;GO:0044710//single-organism metabolic process;GO:0009987//cellular process
101245631	94	29	16.05	5.22	-1.62045	1.81e-08	2.72e-07	yes	XP_004235857.1	BnaAnng19070D [Brassica napus]	-	-	-	-	-	-	-
101245661	767	321	51.75	22.85	-1.17936	8.22e-36	9.83e-34	yes	XP_004241217.1	PREDICTED: laccase-2-like [Solanum lycopersicum]	-	-	-	-	GO:0005576//extracellular region	GO:0016491//oxidoreductase activity;GO:0046872//metal ion binding;GO:0046914//transition metal ion binding;GO:0043169//cation binding;GO:0043167//ion binding;GO:0003824//catalytic activity;GO:0016682//oxidoreductase activity, acting on diphenols and related substances as donors, oxygen as acceptor;GO:0005488//binding;GO:0016679//oxidoreductase activity, acting on diphenols and related substances …	GO:0006725//cellular aromatic compound metabolic process;GO:0019748//secondary metabolic process;GO:0044710//single-organism metabolic process;GO:0009698//phenylpropanoid metabolic process;GO:0044699//single-organism process;GO:0071704//organic substance metabolic process;GO:1901360//organic cyclic compound metabolic process;GO:0009987//cellular process;GO:0008152//metabolic process;GO:0009808//l…
101245684	21	65	4.54	14.83	1.70775	7.03e-07	8.19e-06	yes	XP_004245990.1	PREDICTED: heavy metal-associated isoprenylated plant protein 26-like [Solanum tuberosum]	-	-	-	-	-	GO:0005488//binding;GO:0043167//ion binding;GO:0043169//cation binding	GO:0006810//transport;GO:1902578//single-organism localization;GO:0044699//single-organism process;GO:0051234//establishment of localization;GO:0044765//single-organism transport;GO:0006811//ion transport;GO:0006812//cation transport;GO:0051179//localization
101245689	52	114	5.92	13.69	1.20945	2.55e-07	3.19e-06	yes	XP_004228938.1	PREDICTED: probable S-adenosylmethionine-dependent methyltransferase At5g38780 [Solanum lycopersicum]	-	-	-	-	-	GO:0003824//catalytic activity;GO:0016740//transferase activity;GO:0016741//transferase activity, transferring one-carbon groups	GO:0008152//metabolic process
101245712	10	1	0.99	0.1	-3.30743	0.0117402	0.0464502	yes	XP_004249788.1	PREDICTED: trihelix transcription factor PTL-like [Solanum lycopersicum]	-	-	-	-	-	GO:0005488//binding	-
101245729	103.39	46.92	15.02	7.19	-1.06282	2.81e-05	0.000245359	yes	NP_001316911.1	PREDICTED: chlorophyll a-b binding protein 3A, chloroplastic-like [Solanum lycopersicum]	Metabolism	Energy metabolism	ko00196//Photosynthesis - antenna proteins	K08912	GO:0009521//photosystem;GO:0043227//membrane-bounded organelle;GO:0043229//intracellular organelle;GO:0044435//plastid part;GO:0098796//membrane protein complex;GO:0032991//macromolecular complex;GO:0009579//thylakoid;GO:0044436//thylakoid part;GO:0044446//intracellular organelle part;GO:0044422//organelle part;GO:0005623//cell;GO:0009536//plastid;GO:0044444//cytoplasmic part;GO:0044434//chloropl…	GO:0097159//organic cyclic compound binding;GO:1901363//heterocyclic compound binding;GO:0005488//binding;GO:0043167//ion binding;GO:0043169//cation binding;GO:0046906//tetrapyrrole binding	GO:0019538//protein metabolic process;GO:0008152//metabolic process;GO:0071704//organic substance metabolic process;GO:0006091//generation of precursor metabolites and energy;GO:0044260//cellular macromolecule metabolic process;GO:0006464//cellular protein modification process;GO:0009987//cellular process;GO:0043412//macromolecule modification;GO:0044238//primary metabolic process;GO:0036211//pro…
101245764	22	44	7.14	15.11	1.08151	0.00433513	0.0205883	yes	XP_004240506.1	PREDICTED: bet1-like SNARE 1-1 isoform X1 [Solanum lycopersicum]	Genetic Information Processing	Folding, sorting and degradation	ko04130//SNARE interactions in vesicular transport	K08504	GO:0016020//membrane;GO:0043227//membrane-bounded organelle;GO:0044422//organelle part;GO:0044425//membrane part;GO:0044424//intracellular part;GO:0043229//intracellular organelle;GO:0031090//organelle membrane;GO:0043231//intracellular membrane-bounded organelle;GO:0043226//organelle;GO:0005622//intracellular;GO:0044464//cell part;GO:0005623//cell;GO:0031224//intrinsic component of membrane	GO:0005515//protein binding;GO:0005488//binding	GO:0071840//cellular component organization or biogenesis;GO:0009987//cellular process;GO:0006810//transport;GO:0016043//cellular component organization;GO:0051234//establishment of localization;GO:0061024//membrane organization;GO:0033036//macromolecule localization;GO:0008104//protein localization;GO:0051179//localization
101245787	22	7	7.51	2.52	-1.57539	0.00817489	0.034609	yes	XP_004246484.1	PREDICTED: vacuolar protein sorting-associated protein 55 homolog [Solanum lycopersicum]	-	-	-	-	GO:0005623//cell;GO:0043226//organelle;GO:0043227//membrane-bounded organelle;GO:0005622//intracellular;GO:0044424//intracellular part;GO:0044464//cell part;GO:0043229//intracellular organelle;GO:0043231//intracellular membrane-bounded organelle	-	GO:0006796//phosphate-containing compound metabolic process;GO:0008610//lipid biosynthetic process;GO:0044238//primary metabolic process;GO:0044255//cellular lipid metabolic process;GO:0006629//lipid metabolic process;GO:0045017//glycerolipid biosynthetic process;GO:0044711//single-organism biosynthetic process;GO:0044699//single-organism process;GO:0051234//establishment of localization;GO:00066…
101245805	1065	499	202.27	99.99	-1.01643	4.2e-38	5.54e-36	yes	XP_004230717.1	PREDICTED: classical arabinogalactan protein 9 [Solanum lycopersicum]	-	-	-	-	GO:0016020//membrane	-	-
101245882	14	2	1.49	0.22	-2.75974	0.00419502	0.0200505	yes	XP_004247216.1	PREDICTED: magnesium transporter MRS2-I isoform X1 [Solanum lycopersicum]	-	-	-	-	-	GO:0022890//inorganic cation transmembrane transporter activity;GO:0022857//transmembrane transporter activity;GO:0046873//metal ion transmembrane transporter activity;GO:0015075//ion transmembrane transporter activity;GO:0022891//substrate-specific transmembrane transporter activity;GO:0022892//substrate-specific transporter activity;GO:0005215//transporter activity;GO:0008324//cation transmembr…	GO:0009987//cellular process;GO:0044699//single-organism process;GO:0051234//establishment of localization;GO:0044765//single-organism transport;GO:1902578//single-organism localization;GO:0070838//divalent metal ion transport;GO:0006812//cation transport;GO:0006810//transport;GO:0030001//metal ion transport;GO:0044763//single-organism cellular process;GO:0051179//localization;GO:0072511//divalen…
101245886	8	0	0.73	0.001	-9.51175	0.00782344	0.0335277	yes	XP_004247878.1	PREDICTED: protein ECERIFERUM 26-like [Solanum lycopersicum]	-	-	-	-	-	GO:0016740//transferase activity;GO:0003824//catalytic activity;GO:0016746//transferase activity, transferring acyl groups	-
101245896	46	268	3.46	21.29	2.62133	3.46e-41	5.17e-39	yes	XP_004248734.1	PREDICTED: cytochrome P450 CYP72A219 [Solanum lycopersicum]	-	-	-	-	-	GO:0005488//binding;GO:1901363//heterocyclic compound binding;GO:0043169//cation binding;GO:0097159//organic cyclic compound binding;GO:0046906//tetrapyrrole binding;GO:0003824//catalytic activity;GO:0016491//oxidoreductase activity;GO:0043167//ion binding;GO:0046872//metal ion binding;GO:0046914//transition metal ion binding	GO:0044699//single-organism process;GO:0008152//metabolic process;GO:0044710//single-organism metabolic process
101245933	469	212	97.13	46.32	-1.06828	9.44e-20	4.47e-18	yes	NP_001333365.1	PREDICTED: PLASMODESMATA CALLOSE-BINDING PROTEIN 3 [Solanum lycopersicum]	-	-	-	-	-	-	-
101245957	170	64	11.82	4.69	-1.33357	5.16e-11	1.09e-09	yes	XP_004241977.1	PREDICTED: two-component response regulator-like APRR2 [Solanum lycopersicum]	-	-	-	-	-	GO:0003676//nucleic acid binding;GO:0097159//organic cyclic compound binding;GO:1901363//heterocyclic compound binding;GO:0005488//binding	GO:0009058//biosynthetic process;GO:0044699//single-organism process;GO:0051716//cellular response to stimulus;GO:0044260//cellular macromolecule metabolic process;GO:0065007//biological regulation;GO:0035556//intracellular signal transduction;GO:0044237//cellular metabolic process;GO:0044763//single-organism cellular process;GO:0050794//regulation of cellular process;GO:0009987//cellular process…
101246039	22	4	3.61	0.69	-2.38733	0.000537698	0.00341858	yes	XP_004236191.1	PREDICTED: mitochondrial outer membrane protein porin of 36 kDa-like [Solanum lycopersicum]	-	-	-	-	GO:0044464//cell part;GO:0044429//mitochondrial part;GO:0031975//envelope;GO:0031967//organelle envelope;GO:0005737//cytoplasm;GO:0044424//intracellular part;GO:0044444//cytoplasmic part;GO:0031966//mitochondrial membrane;GO:0005739//mitochondrion;GO:0043227//membrane-bounded organelle;GO:0043226//organelle;GO:0016020//membrane;GO:0043229//intracellular organelle;GO:0043231//intracellular membran…	-	GO:0044699//single-organism process;GO:0009987//cellular process;GO:0044763//single-organism cellular process
101246042	25	4	1.69	0.29	-2.5429	0.000181736	0.00132029	yes	XP_004236781.1	PREDICTED: pentatricopeptide repeat-containing protein At3g04760, chloroplastic [Solanum lycopersicum]	-	-	-	-	GO:0009536//plastid;GO:0043227//membrane-bounded organelle;GO:0043229//intracellular organelle;GO:0043226//organelle;GO:0005622//intracellular;GO:0044424//intracellular part;GO:0005623//cell;GO:0005737//cytoplasm;GO:0044464//cell part;GO:0043231//intracellular membrane-bounded organelle;GO:0044444//cytoplasmic part	-	GO:0032502//developmental process;GO:0009886//post-embryonic morphogenesis;GO:0032501//multicellular organismal process;GO:0009791//post-embryonic development;GO:0044767//single-organism developmental process;GO:0048856//anatomical structure development;GO:0044707//single-multicellular organism process;GO:0007275//multicellular organism development;GO:0044699//single-organism process;GO:0009653//…
101246053	202	81	35.59	15.06	-1.24075	1.73e-11	3.85e-10	yes	XP_004238732.1	PREDICTED: germin-like protein subfamily 1 member 1 isoform X1 [Solanum lycopersicum]	-	-	-	-	GO:0005576//extracellular region	GO:0043167//ion binding;GO:0043169//cation binding;GO:0005488//binding;GO:0046914//transition metal ion binding;GO:0046872//metal ion binding	-
101246079	150	66	6.84	3.17	-1.10951	8.76e-08	1.2e-06	yes	XP_004228617.1	PREDICTED: receptor-like protein 12 [Solanum lycopersicum]	-	-	-	-	-	-	-
101246104	471	188	19.57	8.24	-1.24793	7.05e-25	4.6e-23	yes	XP_004231953.1	nuclear matrix constituent protein 2 [Apium graveolens]	-	-	-	-	-	-	-
101246133	119	45	8.88	3.54	-1.32681	7.26e-08	1e-06	yes	XP_004238385.1	PREDICTED: calcium-dependent protein kinase 29 [Solanum lycopersicum]	Organismal Systems	Environmental adaptation	ko04626//Plant-pathogen interaction	K13412	GO:0044464//cell part;GO:0043231//intracellular membrane-bounded organelle;GO:0005622//intracellular;GO:0043229//intracellular organelle;GO:0016020//membrane;GO:0043226//organelle;GO:0005623//cell;GO:0044424//intracellular part;GO:0043227//membrane-bounded organelle	GO:0016740//transferase activity;GO:1901363//heterocyclic compound binding;GO:0005488//binding;GO:0097367//carbohydrate derivative binding;GO:0001882//nucleoside binding;GO:0036094//small molecule binding;GO:0001883//purine nucleoside binding;GO:0016301//kinase activity;GO:0046872//metal ion binding;GO:0043169//cation binding;GO:0097159//organic cyclic compound binding;GO:0043167//ion binding;GO:…	GO:0006725//cellular aromatic compound metabolic process;GO:0006464//cellular protein modification process;GO:0006950//response to stress;GO:0042537//benzene-containing compound metabolic process;GO:0006955//immune response;GO:0044281//small molecule metabolic process;GO:0051707//response to other organism;GO:0036211//protein modification process;GO:0043207//response to external biotic stimulus;G…
101246172	13	117	1.8	17.1	3.24793	3.43e-23	2.03e-21	yes	XP_004228706.1	PREDICTED: secoisolariciresinol dehydrogenase-like [Solanum lycopersicum]	-	-	-	-	-	GO:0003824//catalytic activity;GO:0016491//oxidoreductase activity;GO:0016616//oxidoreductase activity, acting on the CH-OH group of donors, NAD or NADP as acceptor;GO:0016614//oxidoreductase activity, acting on CH-OH group of donors	GO:0044699//single-organism process;GO:0008152//metabolic process;GO:0044710//single-organism metabolic process
101246223	345	139	25.95	10.94	-1.24612	1.72e-18	7.3e-17	yes	XP_004252272.1	PREDICTED: beta-glucosidase 44-like isoform X1 [Solanum lycopersicum]	Metabolism	Carbohydrate metabolism;Metabolism of other amino acids;Biosynthesis of other secondary metabolites	ko00500//Starch and sucrose metabolism;ko00940//Phenylpropanoid biosynthesis;ko00460//Cyanoamino acid metabolism	K05350	-	-	-
101246259	74	30	9.38	4.01	-1.22599	6.88e-05	0.000552095	yes	XP_004242283.1	PREDICTED: zinc finger protein ZAT4 [Solanum lycopersicum]	-	-	-	-	-	GO:0043169//cation binding;GO:0005488//binding;GO:0043167//ion binding;GO:0097159//organic cyclic compound binding	-
101246264	185	86	15.26	7.48	-1.02864	2.79e-08	4.1e-07	yes	XP_004243360.1	PREDICTED: O-acyltransferase WSD1 [Solanum lycopersicum]	-	-	-	-	-	GO:0003824//catalytic activity;GO:0016747//transferase activity, transferring acyl groups other than amino-acyl groups;GO:0016740//transferase activity;GO:0008374//O-acyltransferase activity;GO:0016746//transferase activity, transferring acyl groups;GO:0016411//acylglycerol O-acyltransferase activity	GO:0009058//biosynthetic process;GO:0008152//metabolic process;GO:1901576//organic substance biosynthetic process;GO:0008610//lipid biosynthetic process;GO:0071704//organic substance metabolic process;GO:0044711//single-organism biosynthetic process;GO:0044699//single-organism process;GO:0006629//lipid metabolic process;GO:0044710//single-organism metabolic process;GO:0044238//primary metabolic p…
101246277	390	179	20.76	10.05	-1.04661	3.15e-16	1.12e-14	yes	XP_004229404.1	Alpha/beta-Hydrolases superfamily protein [Theobroma cacao]	-	-	-	-	-	GO:0003824//catalytic activity	GO:0008152//metabolic process;GO:0044238//primary metabolic process
101246304	109	41	10.72	4.25	-1.33477	1.96e-07	2.51e-06	yes	XP_004232605.1	PREDICTED: dual specificity protein kinase splA-like [Nicotiana tomentosiformis]	Genetic Information Processing	Replication and repair	ko03410//Base excision repair	K01246	-	GO:0016798//hydrolase activity, acting on glycosyl bonds;GO:0003905//alkylbase DNA N-glycosylase activity;GO:0016799//hydrolase activity, hydrolyzing N-glycosyl compounds;GO:0043733//DNA-3-methylbase glycosylase activity;GO:0016787//hydrolase activity;GO:0003824//catalytic activity;GO:0019104//DNA N-glycosylase activity	GO:0044238//primary metabolic process;GO:0071704//organic substance metabolic process;GO:0090304//nucleic acid metabolic process;GO:0051716//cellular response to stimulus;GO:0044237//cellular metabolic process;GO:0044710//single-organism metabolic process;GO:0008152//metabolic process;GO:0009987//cellular process;GO:0044260//cellular macromolecule metabolic process;GO:0033554//cellular response t…
101246350	61	17	6.96	2.05	-1.76346	2.06e-06	2.23e-05	yes	XP_004240802.1	PREDICTED: NAC domain-containing protein 7-like [Solanum lycopersicum]	-	-	-	-	GO:0044464//cell part;GO:0043231//intracellular membrane-bounded organelle;GO:0044424//intracellular part;GO:0005623//cell;GO:0005622//intracellular;GO:0043227//membrane-bounded organelle;GO:0043226//organelle;GO:0043229//intracellular organelle	GO:0005488//binding;GO:1901363//heterocyclic compound binding;GO:0003676//nucleic acid binding;GO:0097159//organic cyclic compound binding	GO:0050789//regulation of biological process;GO:0065007//biological regulation;GO:0044249//cellular biosynthetic process;GO:0071704//organic substance metabolic process;GO:0044260//cellular macromolecule metabolic process;GO:0060255//regulation of macromolecule metabolic process;GO:0009987//cellular process;GO:0044237//cellular metabolic process;GO:0008152//metabolic process;GO:0043170//macromole…
101246354	30	12	1.55	0.6	-1.36923	0.0115913	0.0460526	yes	XP_010322684.1	PREDICTED: probable ATP-dependent RNA helicase DDX11 [Solanum lycopersicum]	-	-	-	-	GO:0005622//intracellular;GO:0044464//cell part;GO:0044424//intracellular part;GO:0043227//membrane-bounded organelle;GO:0043226//organelle;GO:0005623//cell;GO:0043231//intracellular membrane-bounded organelle;GO:0043229//intracellular organelle	GO:0016887//ATPase activity;GO:1901363//heterocyclic compound binding;GO:0097159//organic cyclic compound binding;GO:0032550//purine ribonucleoside binding;GO:0016818//hydrolase activity, acting on acid anhydrides, in phosphorus-containing anhydrides;GO:0004386//helicase activity;GO:0003676//nucleic acid binding;GO:0016787//hydrolase activity;GO:0036094//small molecule binding;GO:0001883//purine …	GO:0043170//macromolecule metabolic process;GO:0009058//biosynthetic process;GO:0022414//reproductive process;GO:0000723//telomere maintenance;GO:0006807//nitrogen compound metabolic process;GO:0006996//organelle organization;GO:0032844//regulation of homeostatic process;GO:0050794//regulation of cellular process;GO:0009628//response to abiotic stimulus;GO:0032392//DNA geometric change;GO:0034645…
101246381	641	1325	155.01	338.06	1.12492	1.67e-57	4.47e-55	yes	NP_001275580.1	pathogenesis-related protein STH-2-like [Solanum lycopersicum]	-	-	-	-	-	-	GO:0050896//response to stimulus;GO:0006950//response to stress
101246390	23	2	1.76	0.16	-3.45943	1.96e-05	0.000176787	yes	XP_004249314.1	PREDICTED: cytochrome P450 86B1-like [Solanum lycopersicum]	-	-	-	-	-	GO:0005488//binding;GO:0046906//tetrapyrrole binding;GO:1901363//heterocyclic compound binding;GO:0046914//transition metal ion binding;GO:0003824//catalytic activity;GO:0046872//metal ion binding;GO:0043169//cation binding;GO:0043167//ion binding;GO:0097159//organic cyclic compound binding;GO:0016491//oxidoreductase activity	GO:0044699//single-organism process;GO:0044710//single-organism metabolic process;GO:0008152//metabolic process
101246420	116	341	15.16	47.01	1.6327	8.56e-29	7.21e-27	yes	NP_001269248.1	Abscicic acid stress ripening protein 4 [Solanum lycopersicum]	-	-	-	-	-	-	GO:0050896//response to stimulus
101246457	24	8	1.76	0.57	-1.62654	0.0107331	0.0431997	yes	XP_010325187.1	PREDICTED: pentatricopeptide repeat-containing protein At5g10690 isoform X1 [Solanum lycopersicum]	-	-	-	-	GO:0044464//cell part;GO:0005622//intracellular;GO:0005737//cytoplasm;GO:0044424//intracellular part;GO:0044444//cytoplasmic part;GO:0005623//cell	GO:1901363//heterocyclic compound binding;GO:0005488//binding;GO:0000166//nucleotide binding;GO:0097159//organic cyclic compound binding;GO:0036094//small molecule binding;GO:1901265//nucleoside phosphate binding;GO:0017076//purine nucleotide binding	GO:0044281//small molecule metabolic process;GO:0016070//RNA metabolic process;GO:1901360//organic cyclic compound metabolic process;GO:0044237//cellular metabolic process;GO:0006090//pyruvate metabolic process;GO:0032787//monocarboxylic acid metabolic process;GO:0006807//nitrogen compound metabolic process;GO:0006082//organic acid metabolic process;GO:0044710//single-organism metabolic process;G…
101246459	102	25	13.93	3.6	-1.95213	2.27e-11	4.98e-10	yes	XP_004245651.1	PREDICTED: BAG family molecular chaperone regulator 3-like [Solanum lycopersicum]	-	-	-	-	-	GO:0005488//binding;GO:0005515//protein binding	-
101246472	19	5	2.95	0.82	-1.84702	0.00664208	0.0293363	yes	XP_004229792.1	PLATZ transcription factor family protein [Theobroma cacao]	-	-	-	-	GO:0005623//cell;GO:0044464//cell part	GO:0043167//ion binding;GO:0046914//transition metal ion binding;GO:0005488//binding;GO:0046872//metal ion binding;GO:0043169//cation binding	-
101246595	19	3	1.87	0.31	-2.5927	0.000860688	0.00516986	yes	XP_004233759.2	PREDICTED: probable serine/threonine-protein kinase Cx32, chloroplastic [Solanum lycopersicum]	-	-	-	-	-	GO:0001882//nucleoside binding;GO:0016301//kinase activity;GO:0036094//small molecule binding;GO:0032550//purine ribonucleoside binding;GO:1901363//heterocyclic compound binding;GO:0003824//catalytic activity;GO:0016772//transferase activity, transferring phosphorus-containing groups;GO:0032549//ribonucleoside binding;GO:0097367//carbohydrate derivative binding;GO:0001883//purine nucleoside bindi…	GO:0036211//protein modification process;GO:0044238//primary metabolic process;GO:0019538//protein metabolic process;GO:0009987//cellular process;GO:0043170//macromolecule metabolic process;GO:0071704//organic substance metabolic process;GO:0008152//metabolic process;GO:0006464//cellular protein modification process;GO:0043412//macromolecule modification;GO:0044260//cellular macromolecule metabol…
101246611	227	102	41.89	19.86	-1.07674	1.26e-10	2.52e-09	yes	XP_004235615.1	PREDICTED: dof zinc finger protein DOF3.1-like [Solanum lycopersicum]	-	-	-	-	GO:0043226//organelle;GO:0005622//intracellular;GO:0005623//cell;GO:0043227//membrane-bounded organelle;GO:0043231//intracellular membrane-bounded organelle;GO:0043229//intracellular organelle;GO:0044424//intracellular part;GO:0044464//cell part	GO:0043169//cation binding;GO:0005488//binding;GO:0043167//ion binding;GO:0001071//nucleic acid binding transcription factor activity;GO:1901363//heterocyclic compound binding;GO:0097159//organic cyclic compound binding;GO:0003676//nucleic acid binding	GO:0016053//organic acid biosynthetic process;GO:0009059//macromolecule biosynthetic process;GO:0009987//cellular process;GO:0050789//regulation of biological process;GO:1901576//organic substance biosynthetic process;GO:1901564//organonitrogen compound metabolic process;GO:0006520//cellular amino acid metabolic process;GO:0044260//cellular macromolecule metabolic process;GO:0034645//cellular mac…
101246615	14	2	2.6	0.39	-2.73697	0.00419502	0.0200505	yes	XP_004236193.1	PREDICTED: 22.0 kDa heat shock protein-like [Solanum lycopersicum]	-	-	-	-	-	-	-
101246665	1381	410	43.5	13.63	-1.67423	4.26e-103	2.79e-100	yes	XP_004229963.1	PREDICTED: BAG family molecular chaperone regulator 6 [Solanum lycopersicum]	-	-	-	-	GO:0030054//cell junction;GO:0005911//cell-cell junction	GO:0005515//protein binding;GO:0005488//binding	GO:0009605//response to external stimulus;GO:0051716//cellular response to stimulus;GO:0009987//cellular process;GO:0043068//positive regulation of programmed cell death;GO:0065007//biological regulation;GO:0010941//regulation of cell death;GO:0044267//cellular protein metabolic process;GO:0009607//response to biotic stimulus;GO:0050794//regulation of cellular process;GO:0043170//macromolecule me…
101246666	88	502	21.96	132.19	2.58966	1.14e-74	4.33e-72	yes	NP_001310248.1	PREDICTED: pathogenesis-related protein STH-2 [Solanum lycopersicum]	-	-	-	-	-	-	GO:0050896//response to stimulus;GO:0006950//response to stress
101246667	11	133	0.89	11.41	3.68035	3.16e-29	2.75e-27	yes	XP_004230048.3	PREDICTED: protein ZINC INDUCED FACILITATOR-LIKE 1-like isoform X1 [Solanum tuberosum]	-	-	-	-	GO:0044425//membrane part;GO:0031224//intrinsic component of membrane;GO:0016020//membrane	-	GO:0044699//single-organism process;GO:0044763//single-organism cellular process;GO:0009987//cellular process
101246681	1	10	0.11	1.13	3.36075	0.0117402	0.0464502	yes	XP_004249657.1	PREDICTED: probable 2-oxoglutarate/Fe(II)-dependent dioxygenase [Solanum lycopersicum]	-	-	-	-	-	GO:0005488//binding;GO:0016491//oxidoreductase activity;GO:0003824//catalytic activity;GO:0043169//cation binding;GO:0046914//transition metal ion binding;GO:0043167//ion binding;GO:0046872//metal ion binding;GO:0016705//oxidoreductase activity, acting on paired donors, with incorporation or reduction of molecular oxygen	GO:0044710//single-organism metabolic process;GO:0008152//metabolic process;GO:0044699//single-organism process
101246699	10	0	1.47	0.001	-10.5216	0.00195752	0.0104578	yes	XP_004235434.2	PREDICTED: transcription factor WER-like [Solanum lycopersicum]	-	-	-	-	-	GO:1901363//heterocyclic compound binding;GO:0005488//binding;GO:0003676//nucleic acid binding;GO:0097159//organic cyclic compound binding	-
101246812	158	67	17.53	7.84	-1.1609	1.49e-08	2.27e-07	yes	NP_001303844.1	PREDICTED: probable WRKY transcription factor 40 [Solanum lycopersicum]	-	-	-	-	-	GO:0097159//organic cyclic compound binding;GO:0001071//nucleic acid binding transcription factor activity;GO:0003677//DNA binding;GO:0005488//binding;GO:0003676//nucleic acid binding;GO:1901363//heterocyclic compound binding	GO:0019222//regulation of metabolic process;GO:0010468//regulation of gene expression;GO:0065007//biological regulation;GO:0060255//regulation of macromolecule metabolic process;GO:0050789//regulation of biological process
101246829	49	11	5.47	1.29	-2.08417	3.29e-06	3.43e-05	yes	XP_004240753.1	PREDICTED: protein EXORDIUM-like 3 [Solanum lycopersicum]	-	-	-	-	GO:0030312//external encapsulating structure;GO:0044464//cell part;GO:0005623//cell;GO:0071944//cell periphery;GO:0005911//cell-cell junction;GO:0030054//cell junction;GO:0005618//cell wall	-	GO:0016043//cellular component organization;GO:0009987//cellular process;GO:0007010//cytoskeleton organization;GO:0006996//organelle organization;GO:0000226//microtubule cytoskeleton organization;GO:0044699//single-organism process;GO:0007017//microtubule-based process;GO:0071840//cellular component organization or biogenesis;GO:0044763//single-organism cellular process;GO:1902589//single-organis…
101246870	20	3	1.96	0.31	-2.66051	0.000491667	0.00316216	yes	NP_001333903.1	PREDICTED: fructose-bisphosphate aldolase 1, chloroplastic [Solanum lycopersicum]	Metabolism	Global and Overview;Energy metabolism;Carbohydrate metabolism	ko01200//Carbon metabolism;ko01230//Biosynthesis of amino acids;ko00010//Glycolysis / Gluconeogenesis;ko00710//Carbon fixation in photosynthetic organisms;ko00051//Fructose and mannose metabolism;ko00030//Pentose phosphate pathway	K01623	-	GO:0003824//catalytic activity;GO:0016829//lyase activity;GO:0016830//carbon-carbon lyase activity;GO:0016832//aldehyde-lyase activity	GO:0009987//cellular process;GO:0043436//oxoacid metabolic process;GO:0008152//metabolic process;GO:0044281//small molecule metabolic process;GO:0006090//pyruvate metabolic process;GO:0006082//organic acid metabolic process;GO:0071704//organic substance metabolic process;GO:0032787//monocarboxylic acid metabolic process;GO:0044699//single-organism process;GO:0044237//cellular metabolic process;GO…
101246874	16	3	2.88	0.57	-2.33703	0.00444281	0.0210029	yes	XP_004231430.1	PREDICTED: protein SHI RELATED SEQUENCE 1 isoform X1 [Solanum lycopersicum]	-	-	-	-	-	-	-
101246901	838	352	33.64	14.91	-1.1739	1.21e-38	1.6e-36	yes	XP_004235278.1	PREDICTED: WEB family protein At3g02930, chloroplastic [Solanum lycopersicum]	-	-	-	-	-	-	-
101246952	45	14	9.17	3.01	-1.60716	0.000208018	0.00148529	yes	XP_004246488.1	Os01g0862200 [Oryza sativa Japonica Group]	-	-	-	-	GO:0044434//chloroplast part;GO:0043227//membrane-bounded organelle;GO:0009507//chloroplast;GO:0005737//cytoplasm;GO:0044435//plastid part;GO:0009536//plastid;GO:0044464//cell part;GO:0043226//organelle;GO:0044422//organelle part;GO:0044424//intracellular part;GO:0043231//intracellular membrane-bounded organelle;GO:0044444//cytoplasmic part;GO:0009532//plastid stroma;GO:0043229//intracellular org…	-	GO:0044710//single-organism metabolic process;GO:0006796//phosphate-containing compound metabolic process;GO:0044281//small molecule metabolic process;GO:0046496//nicotinamide nucleotide metabolic process;GO:0044260//cellular macromolecule metabolic process;GO:0044238//primary metabolic process;GO:0046483//heterocycle metabolic process;GO:0034641//cellular nitrogen compound metabolic process;GO:0…
101246975	25	7	3.96	1.17	-1.75899	0.00335045	0.0166042	yes	XP_004231581.2	PREDICTED: protein PHLOEM PROTEIN 2-LIKE A1 [Solanum lycopersicum]	-	-	-	-	-	-	-
101247037	38	13	3.87	1.4	-1.46691	0.000949698	0.00561414	yes	XP_004242989.1	protein MULTIPOLAR SPINDLE 1 [Arabidopsis thaliana]	-	-	-	-	-	-	GO:0044702//single organism reproductive process;GO:0022414//reproductive process;GO:0007049//cell cycle;GO:0048229//gametophyte development;GO:0009987//cellular process;GO:0044763//single-organism cellular process;GO:0044767//single-organism developmental process;GO:1903046//meiotic cell cycle process;GO:0007275//multicellular organism development;GO:0006996//organelle organization;GO:0022402//c…
101247043	111	41	13.68	5.33	-1.35986	9.52e-08	1.29e-06	yes	XP_004244287.1	PREDICTED: BES1/BZR1 homolog protein 4 [Solanum lycopersicum]	-	-	-	-	-	-	GO:0010468//regulation of gene expression;GO:0019222//regulation of metabolic process;GO:0065007//biological regulation;GO:0050789//regulation of biological process;GO:0060255//regulation of macromolecule metabolic process
101247047	22	91	1.86	8.11	2.1244	6.04e-12	1.41e-10	yes	XP_004245060.1	PREDICTED: UDP-glycosyltransferase 74F2-like [Solanum lycopersicum]	-	-	-	-	-	GO:0016757//transferase activity, transferring glycosyl groups;GO:0003824//catalytic activity;GO:0016740//transferase activity	-
101247064	42	13	7.02	2.29	-1.61612	0.000361763	0.00240679	yes	XP_004229711.1	Ferredoxin-related [Theobroma cacao]	-	-	-	-	-	-	-
101247078	42	158	5.22	20.74	1.99029	3.03e-18	1.25e-16	yes	XP_004248737.1	PREDICTED: 2-hydroxyisoflavanone dehydratase-like [Solanum lycopersicum]	-	-	-	-	-	GO:0003824//catalytic activity	-
101247080	121	54	7.21	3.4	-1.08446	3.29e-06	3.43e-05	yes	XP_004231294.1	PREDICTED: acyl-CoA-binding domain-containing protein 5-like [Solanum lycopersicum]	-	-	-	-	-	-	-
101247100	19	43	1.74	4.17	1.26096	0.00132118	0.00745772	yes	XP_004251097.1	PREDICTED: E3 ubiquitin-protein ligase PUB23-like [Solanum lycopersicum]	-	-	-	-	-	GO:0003824//catalytic activity;GO:0016740//transferase activity;GO:0019787//ubiquitin-like protein transferase activity	GO:0044237//cellular metabolic process;GO:0071704//organic substance metabolic process;GO:0008152//metabolic process;GO:0036211//protein modification process;GO:0043412//macromolecule modification;GO:0019538//protein metabolic process;GO:0043170//macromolecule metabolic process;GO:0044260//cellular macromolecule metabolic process;GO:0070647//protein modification by small protein conjugation or re…
101247159	0	10	0.001	2.62	11.3554	0.00195752	0.0104578	yes	XP_004247349.1	PREDICTED: ethylene-responsive transcription factor ERF098-like [Solanum lycopersicum]	-	-	-	-	GO:0044424//intracellular part;GO:0043231//intracellular membrane-bounded organelle;GO:0043226//organelle;GO:0005623//cell;GO:0005622//intracellular;GO:0044464//cell part;GO:0043229//intracellular organelle;GO:0043227//membrane-bounded organelle	GO:0005488//binding;GO:1901363//heterocyclic compound binding;GO:0097159//organic cyclic compound binding;GO:0001071//nucleic acid binding transcription factor activity;GO:0003676//nucleic acid binding	GO:0043170//macromolecule metabolic process;GO:0060255//regulation of macromolecule metabolic process;GO:0044249//cellular biosynthetic process;GO:0010468//regulation of gene expression;GO:0009987//cellular process;GO:0071704//organic substance metabolic process;GO:0009059//macromolecule biosynthetic process;GO:1901576//organic substance biosynthetic process;GO:0034645//cellular macromolecule bio…
101247255	123	293	10.21	25.66	1.32954	8.94e-19	3.93e-17	yes	XP_004229493.1	PREDICTED: sugar transporter ERD6-like 16 [Solanum lycopersicum]	-	-	-	-	GO:0031224//intrinsic component of membrane;GO:0016020//membrane;GO:0044425//membrane part	GO:0005215//transporter activity;GO:0022857//transmembrane transporter activity	GO:0044699//single-organism process;GO:1902578//single-organism localization;GO:0006810//transport;GO:0051179//localization;GO:0051234//establishment of localization;GO:0044763//single-organism cellular process;GO:0044765//single-organism transport;GO:0009987//cellular process
101247287	46	15	5.56	1.91	-1.54151	0.000269861	0.00186138	yes	XP_004233542.1	PREDICTED: probable 2-oxoglutarate-dependent dioxygenase AOP1 [Solanum lycopersicum]	-	-	-	-	-	GO:0005488//binding;GO:0051213//dioxygenase activity;GO:0003824//catalytic activity;GO:0016491//oxidoreductase activity;GO:0016705//oxidoreductase activity, acting on paired donors, with incorporation or reduction of molecular oxygen;GO:0043169//cation binding;GO:0043167//ion binding	GO:0008152//metabolic process;GO:0044699//single-organism process;GO:0044710//single-organism metabolic process
101247357	47	14	2.38	0.75	-1.666	9.05e-05	0.000704575	yes	XP_019069263.1	PREDICTED: multiple C2 and transmembrane domain-containing protein 1-like [Solanum lycopersicum]	-	-	-	-	GO:0005623//cell;GO:0044464//cell part;GO:0044425//membrane part;GO:0043229//intracellular organelle;GO:0043227//membrane-bounded organelle;GO:0031224//intrinsic component of membrane;GO:0043231//intracellular membrane-bounded organelle;GO:0030312//external encapsulating structure;GO:0071944//cell periphery;GO:0043226//organelle;GO:0030054//cell junction;GO:0005622//intracellular;GO:0016020//memb…	GO:0003824//catalytic activity;GO:0016740//transferase activity	-
101247380	68	31	6.93	3.33	-1.05733	0.000792724	0.00480564	yes	XP_010315625.1	PREDICTED: probable WRKY transcription factor 14 [Solanum lycopersicum]	-	-	-	-	-	GO:1901363//heterocyclic compound binding;GO:0005488//binding;GO:0097159//organic cyclic compound binding;GO:0003676//nucleic acid binding;GO:0001071//nucleic acid binding transcription factor activity;GO:0003677//DNA binding	GO:0010468//regulation of gene expression;GO:0019222//regulation of metabolic process;GO:0050789//regulation of biological process;GO:0065007//biological regulation;GO:0060255//regulation of macromolecule metabolic process
101247391	175	77	10.81	5.03	-1.10374	1.15e-08	1.77e-07	yes	XP_004233041.1	O-fucosyltransferase family protein isoform 1 [Theobroma cacao]	-	-	-	-	-	GO:0003824//catalytic activity;GO:0016740//transferase activity	-
101247397	21	7	8.26	2.9	-1.51009	0.0126012	0.0492883	yes	NP_001266262.1	Phytosulfokine 3 precursor [Arabidopsis thaliana]	-	-	-	-	-	GO:0005488//binding;GO:0005102//receptor binding;GO:0005515//protein binding	GO:0044699//single-organism process
101247433	0	12	0.001	7.14	12.8017	0.000489894	0.00315357	yes	XP_004241003.1	Cytochrome oxidase assembly 3, mitochondrial [Gossypium arboreum]	-	-	-	-	GO:0043231//intracellular membrane-bounded organelle;GO:0016020//membrane;GO:0043227//membrane-bounded organelle;GO:0043226//organelle;GO:0005623//cell;GO:0005622//intracellular;GO:0043229//intracellular organelle;GO:0031224//intrinsic component of membrane;GO:0044425//membrane part;GO:0044424//intracellular part;GO:0044464//cell part	-	-
101247442	82	217	12.52	34.95	1.48106	1.15e-16	4.29e-15	yes	XP_010323857.1	Guanosine-5'-triphosphate,3'-diphosphate pyrophosphatase [Gossypium arboreum]	-	-	-	-	-	-	GO:1902582//single-organism intracellular transport;GO:0034613//cellular protein localization;GO:0006810//transport;GO:0006913//nucleocytoplasmic transport;GO:0006606//protein import into nucleus;GO:0044744//protein targeting to nucleus;GO:0006886//intracellular protein transport;GO:0008104//protein localization;GO:1902580//single-organism cellular localization;GO:0046907//intracellular transport…
101247455	2431	879	132.56	50.57	-1.39029	9.17e-138	1.24e-134	yes	XP_004246576.2	PREDICTED: probable leucine-rich repeat receptor-like protein kinase At1g68400 [Solanum lycopersicum]	-	-	-	-	GO:0043231//intracellular membrane-bounded organelle;GO:0031224//intrinsic component of membrane;GO:0005623//cell;GO:0043227//membrane-bounded organelle;GO:0044425//membrane part;GO:0044464//cell part;GO:0044424//intracellular part;GO:0016020//membrane;GO:0043226//organelle;GO:0043229//intracellular organelle;GO:0005622//intracellular	GO:0001883//purine nucleoside binding;GO:0032549//ribonucleoside binding;GO:0036094//small molecule binding;GO:0005488//binding;GO:0001882//nucleoside binding;GO:0097159//organic cyclic compound binding;GO:0003676//nucleic acid binding;GO:0032550//purine ribonucleoside binding;GO:0003824//catalytic activity;GO:0016301//kinase activity;GO:0016740//transferase activity;GO:0016772//transferase activ…	GO:0050789//regulation of biological process;GO:0043170//macromolecule metabolic process;GO:0019222//regulation of metabolic process;GO:0044267//cellular protein metabolic process;GO:0044260//cellular macromolecule metabolic process;GO:0044238//primary metabolic process;GO:0065007//biological regulation;GO:0036211//protein modification process;GO:0043412//macromolecule modification;GO:0060255//re…
101247505	18	2	1.86	0.22	-3.07973	0.000404902	0.00265622	yes	XP_004252858.1	PREDICTED: adhesive plaque matrix protein-like [Solanum lycopersicum]	-	-	-	-	-	-	-
101247511	22.18	81	1.72	6.64	1.94877	7.34e-10	1.34e-08	yes	XP_004236279.1	PREDICTED: (+)-menthofuran synthase-like [Solanum lycopersicum]	-	-	-	-	-	GO:0003824//catalytic activity;GO:1901363//heterocyclic compound binding;GO:0043167//ion binding;GO:0016491//oxidoreductase activity;GO:0005488//binding;GO:0046914//transition metal ion binding;GO:0046906//tetrapyrrole binding;GO:0043169//cation binding;GO:0046872//metal ion binding;GO:0097159//organic cyclic compound binding	GO:0044710//single-organism metabolic process;GO:0044699//single-organism process;GO:0008152//metabolic process
101247575	180	84	9	4.43	-1.02262	5.26e-08	7.41e-07	yes	XP_004231958.1	PREDICTED: dentin sialophosphoprotein-like isoform X2 [Solanum tuberosum]	-	-	-	-	-	-	-
101247600	19	43	2.51	5.99	1.25487	0.00132118	0.00745772	yes	XP_004235863.1	PREDICTED: inositol polyphosphate multikinase beta [Solanum lycopersicum]	Environmental Information Processing;Metabolism	Signal transduction;Carbohydrate metabolism	ko04070//Phosphatidylinositol signaling system;ko00562//Inositol phosphate metabolism	K00915	-	GO:0016740//transferase activity;GO:0016772//transferase activity, transferring phosphorus-containing groups;GO:0051766//inositol trisphosphate kinase activity;GO:0016301//kinase activity;GO:0016773//phosphotransferase activity, alcohol group as acceptor;GO:0003824//catalytic activity	GO:0006796//phosphate-containing compound metabolic process;GO:0009987//cellular process;GO:0006793//phosphorus metabolic process;GO:0008152//metabolic process;GO:0044237//cellular metabolic process
101247631	140	60	14.54	6.57	-1.14606	1.28e-07	1.69e-06	yes	XP_004243365.1	PREDICTED: leucine-rich repeat extensin-like protein 4 [Solanum lycopersicum]	-	-	-	-	-	-	-
101247637	4	23	0.43	2.59	2.59054	0.000313464	0.00211471	yes	XP_004244289.1	PREDICTED: protein trichome birefringence-like 41 [Solanum lycopersicum]	-	-	-	-	-	-	-
101247667	87	172	6.65	13.88	1.06158	1.46e-08	2.22e-07	yes	XP_004230807.1	PREDICTED: serine carboxypeptidase-like 26 [Solanum lycopersicum]	-	-	-	-	-	GO:0008233//peptidase activity;GO:0016787//hydrolase activity;GO:0003824//catalytic activity;GO:0004180//carboxypeptidase activity;GO:0008238//exopeptidase activity;GO:0070011//peptidase activity, acting on L-amino acid peptides	GO:0044238//primary metabolic process;GO:0019538//protein metabolic process;GO:0043170//macromolecule metabolic process;GO:0008152//metabolic process;GO:0071704//organic substance metabolic process
101247696	204	95	15.54	7.64	-1.02434	6.03e-09	9.66e-08	yes	XP_004234077.1	BnaC05g13140D [Brassica napus]	-	-	-	-	-	-	-
101247723	203	460	17.72	42.37	1.25766	3.08e-26	2.19e-24	yes	XP_004240424.1	PREDICTED: CBL-interacting serine/threonine-protein kinase 11-like [Solanum lycopersicum]	-	-	-	-	-	GO:0036094//small molecule binding;GO:0016301//kinase activity;GO:0097367//carbohydrate derivative binding;GO:0016740//transferase activity;GO:0004672//protein kinase activity;GO:0016772//transferase activity, transferring phosphorus-containing groups;GO:0005488//binding;GO:1901363//heterocyclic compound binding;GO:0097159//organic cyclic compound binding;GO:0032549//ribonucleoside binding;GO:000…	GO:0071704//organic substance metabolic process;GO:0006464//cellular protein modification process;GO:0050794//regulation of cellular process;GO:0019538//protein metabolic process;GO:0035556//intracellular signal transduction;GO:0009725//response to hormone;GO:0050896//response to stimulus;GO:0044238//primary metabolic process;GO:0044267//cellular protein metabolic process;GO:0043170//macromolecul…
101247734	2	14	0.67	4.96	2.88811	0.00419502	0.0200505	yes	XP_004244034.1	BnaC02g15430D [Brassica napus]	-	-	-	-	-	-	-
101247736	64	9	7.79	1.16	-2.7475	1.66e-10	3.28e-09	yes	XP_004244596.1	PREDICTED: PGR5-like protein 1B, chloroplastic [Solanum lycopersicum]	-	-	-	-	-	-	-
101247750	161	61	33.17	13.26	-1.3228	2.39e-10	4.62e-09	yes	XP_004229409.1	BnaC05g01360D [Brassica napus]	-	-	-	-	-	-	-
101247763	54	114	5.67	12.62	1.15429	6.97e-07	8.14e-06	yes	XP_004231219.1	zinc finger family protein [Populus trichocarpa]	-	-	-	-	-	GO:0046914//transition metal ion binding;GO:0043169//cation binding;GO:0005488//binding;GO:0046872//metal ion binding;GO:0043167//ion binding;GO:0001871//pattern binding	-
101247796	12	35	0.89	2.74	1.6223	0.000727566	0.00447075	yes	XP_004234932.2	PREDICTED: probable pectinesterase/pectinesterase inhibitor 17 [Solanum lycopersicum]	Metabolism	Carbohydrate metabolism	ko00500//Starch and sucrose metabolism;ko00040//Pentose and glucuronate interconversions	K01051	GO:0044464//cell part;GO:0005623//cell;GO:0071944//cell periphery;GO:0030312//external encapsulating structure	GO:0030234//enzyme regulator activity;GO:0016787//hydrolase activity;GO:0098772//molecular function regulator;GO:0052689//carboxylic ester hydrolase activity;GO:0016788//hydrolase activity, acting on ester bonds;GO:0003824//catalytic activity	GO:0044238//primary metabolic process;GO:0071704//organic substance metabolic process;GO:0009892//negative regulation of metabolic process;GO:0071840//cellular component organization or biogenesis;GO:0009987//cellular process;GO:0065007//biological regulation;GO:0009056//catabolic process;GO:0005976//polysaccharide metabolic process;GO:0043170//macromolecule metabolic process;GO:0005975//carbohyd…
101247830	26	51	3.2	6.63	1.05094	0.00285125	0.0144209	yes	XP_004241730.1	PREDICTED: mitochondrial arginine transporter BAC2-like [Solanum lycopersicum]	-	-	-	-	GO:0044422//organelle part;GO:0031224//intrinsic component of membrane;GO:0044464//cell part;GO:0005622//intracellular;GO:0031090//organelle membrane;GO:0044424//intracellular part;GO:0031975//envelope;GO:0019866//organelle inner membrane;GO:0005623//cell;GO:0044446//intracellular organelle part;GO:0044425//membrane part;GO:0043231//intracellular membrane-bounded organelle;GO:0043226//organelle;G…	GO:0022892//substrate-specific transporter activity;GO:0005215//transporter activity;GO:0022891//substrate-specific transmembrane transporter activity;GO:0015075//ion transmembrane transporter activity;GO:0008324//cation transmembrane transporter activity;GO:0022857//transmembrane transporter activity	GO:0019752//carboxylic acid metabolic process;GO:0006810//transport;GO:1902578//single-organism localization;GO:0044763//single-organism cellular process;GO:0015711//organic anion transport;GO:0006812//cation transport;GO:1901605//alpha-amino acid metabolic process;GO:0015849//organic acid transport;GO:0043092//L-amino acid import;GO:0050896//response to stimulus;GO:0098655//cation transmembrane …
101247844	15	2	5.51	0.78	-2.82051	0.0023592	0.0122588	yes	XP_004245571.1	PREDICTED: protein SPIRAL1-like 5 [Solanum lycopersicum]	-	-	-	-	GO:0005856//cytoskeleton;GO:0005623//cell;GO:0043229//intracellular organelle;GO:0044464//cell part;GO:0043232//intracellular non-membrane-bounded organelle;GO:0015630//microtubule cytoskeleton;GO:0043226//organelle;GO:0044424//intracellular part;GO:0005622//intracellular;GO:0043228//non-membrane-bounded organelle	-	-
101247859	68	23	4.05	1.44	-1.49185	1.14e-05	0.000107468	yes	XP_004229967.1	Plasma membrane-like protein isoform 1 [Theobroma cacao]	-	-	-	-	-	-	-
101247921	125	38	34.27	10.99	-1.64075	9.07e-11	1.85e-09	yes	XP_010321468.2	PREDICTED: LOW QUALITY PROTEIN: major pollen allergen Lol p 11-like [Solanum lycopersicum]	-	-	-	-	-	-	-
101247939	175	41	17.29	4.27	-2.01763	4.35e-19	1.96e-17	yes	XP_004244290.1	PREDICTED: protein trichome birefringence-like 41 [Solanum lycopersicum]	-	-	-	-	-	-	-
101247960	239	80	17.72	6.26	-1.50114	1.47e-17	5.85e-16	yes	XP_010325628.1	PREDICTED: pectinesterase 2 [Solanum lycopersicum]	Metabolism	Carbohydrate metabolism	ko00500//Starch and sucrose metabolism;ko00040//Pentose and glucuronate interconversions	K01051	GO:0044464//cell part;GO:0071944//cell periphery;GO:0005623//cell;GO:0030312//external encapsulating structure	GO:0030234//enzyme regulator activity;GO:0016788//hydrolase activity, acting on ester bonds;GO:0052689//carboxylic ester hydrolase activity;GO:0003824//catalytic activity;GO:0016787//hydrolase activity;GO:0098772//molecular function regulator	GO:1901575//organic substance catabolic process;GO:0016052//carbohydrate catabolic process;GO:0044238//primary metabolic process;GO:0009057//macromolecule catabolic process;GO:0071704//organic substance metabolic process;GO:0008152//metabolic process;GO:0000272//polysaccharide catabolic process;GO:0019222//regulation of metabolic process;GO:0071840//cellular component organization or biogenesis;G…
101247990	446	173	38	15.55	-1.28908	5.27e-25	3.49e-23	yes	XP_004252276.1	PREDICTED: glucan endo-1,3-beta-glucosidase 12-like [Solanum lycopersicum]	-	-	-	-	-	GO:0015926//glucosidase activity;GO:0016798//hydrolase activity, acting on glycosyl bonds;GO:0016787//hydrolase activity;GO:0003824//catalytic activity;GO:0004553//hydrolase activity, hydrolyzing O-glycosyl compounds;GO:0008422//beta-glucosidase activity	GO:0044238//primary metabolic process;GO:0008152//metabolic process
101248027	16	2	2.33	0.31	-2.90999	0.00131833	0.00744945	yes	XP_004244597.1	PREDICTED: expansin-A18 [Solanum lycopersicum]	-	-	-	-	GO:0005623//cell;GO:0044464//cell part;GO:0071944//cell periphery;GO:0030312//external encapsulating structure	-	GO:0045229//external encapsulating structure organization;GO:0016043//cellular component organization;GO:0071555//cell wall organization;GO:0071554//cell wall organization or biogenesis;GO:0071840//cellular component organization or biogenesis;GO:0009987//cellular process
101248046	0	18	0.001	1.47	10.5216	7.69e-06	7.51e-05	yes	XP_004247352.1	PREDICTED: premnaspirodiene oxygenase-like [Solanum lycopersicum]	-	-	-	-	-	GO:0046872//metal ion binding;GO:0003824//catalytic activity;GO:0097159//organic cyclic compound binding;GO:1901363//heterocyclic compound binding;GO:0046906//tetrapyrrole binding;GO:0005488//binding;GO:0043167//ion binding;GO:0016491//oxidoreductase activity;GO:0046914//transition metal ion binding;GO:0043169//cation binding	GO:0008152//metabolic process;GO:0044699//single-organism process;GO:0044710//single-organism metabolic process
101248050	241	104	17.47	7.96	-1.13404	8.78e-12	2e-10	yes	XP_004248040.1	PREDICTED: probable polygalacturonase At1g80170 [Solanum lycopersicum]	Metabolism	Carbohydrate metabolism	ko00500//Starch and sucrose metabolism;ko00040//Pentose and glucuronate interconversions	K01213	-	GO:0004553//hydrolase activity, hydrolyzing O-glycosyl compounds;GO:0016798//hydrolase activity, acting on glycosyl bonds;GO:0016787//hydrolase activity;GO:0003824//catalytic activity	GO:0009987//cellular process;GO:0044238//primary metabolic process;GO:0045229//external encapsulating structure organization;GO:0071840//cellular component organization or biogenesis;GO:0016043//cellular component organization;GO:0008152//metabolic process
101248054	24	51	2.51	5.62	1.16288	0.0011026	0.00638716	yes	XP_004231220.1	zinc finger family protein [Populus trichocarpa]	-	-	-	-	-	GO:0043167//ion binding;GO:0001871//pattern binding;GO:0046872//metal ion binding;GO:0046914//transition metal ion binding;GO:0043169//cation binding;GO:0005488//binding	-
101248072	10	1	2.91	0.31	-3.23068	0.0117402	0.0464502	yes	XP_004233545.1	PREDICTED: desiccation-related protein clone PCC27-04 [Solanum lycopersicum]	-	-	-	-	-	-	GO:0050896//response to stimulus;GO:0001101//response to acid chemical;GO:0042221//response to chemical
101248079	84	37	8.22	3.82	-1.10557	7.66e-05	0.000607521	yes	XP_004251852.1	PREDICTED: protochlorophyllide reductase-like [Solanum lycopersicum]	Metabolism	Metabolism of cofactors and vitamins	ko00860//Porphyrin and chlorophyll metabolism	K00218	-	GO:0016627//oxidoreductase activity, acting on the CH-CH group of donors;GO:0003824//catalytic activity;GO:0016491//oxidoreductase activity;GO:0016628//oxidoreductase activity, acting on the CH-CH group of donors, NAD or NADP as acceptor	GO:0044710//single-organism metabolic process;GO:0008152//metabolic process;GO:0044699//single-organism process
101248091	26	8	3.33	1.08	-1.62449	0.00458378	0.021561	yes	XP_004236624.1	PREDICTED: myb-like protein D-like [Solanum tuberosum]	-	-	-	-	-	-	-
101248116	53	23	11.72	5.37	-1.12598	0.0017971	0.00971833	yes	XP_004242318.1	PREDICTED: rRNA-processing protein FYV7 [Nicotiana tomentosiformis]	-	-	-	-	-	-	-
101248157	223	89	10.95	4.61	-1.24809	8.92e-13	2.29e-11	yes	XP_004232205.1	PREDICTED: phosphate transporter PHO1 homolog 3-like [Solanum lycopersicum]	-	-	-	-	GO:0044425//membrane part;GO:0031224//intrinsic component of membrane;GO:0016020//membrane	-	GO:0044699//single-organism process;GO:0051179//localization;GO:0051234//establishment of localization;GO:0006810//transport
101248168	338	121	48.56	18.34	-1.40477	1.08e-21	5.9e-20	yes	XP_004233691.2	PREDICTED: thaumatin-like protein [Solanum lycopersicum]	-	-	-	-	-	-	GO:0008152//metabolic process;GO:0044238//primary metabolic process;GO:0044237//cellular metabolic process;GO:0045491//xylan metabolic process;GO:0071554//cell wall organization or biogenesis;GO:0044260//cellular macromolecule metabolic process;GO:0009987//cellular process;GO:0044036//cell wall macromolecule metabolic process;GO:0005976//polysaccharide metabolic process;GO:0010410//hemicellulose …
101248230	27	8	1.82	0.57	-1.6749	0.00295847	0.0148935	yes	NP_001296304.1	cryptochrome DASH, chloroplastic/mitochondrial [Solanum lycopersicum]	-	-	-	-	GO:0005737//cytoplasm;GO:0043231//intracellular membrane-bounded organelle;GO:0005622//intracellular;GO:0043229//intracellular organelle;GO:0044424//intracellular part;GO:0044444//cytoplasmic part;GO:0043227//membrane-bounded organelle;GO:0009536//plastid;GO:0005623//cell;GO:0043226//organelle;GO:0044464//cell part	GO:0016830//carbon-carbon lyase activity;GO:0004871//signal transducer activity;GO:0097159//organic cyclic compound binding;GO:0003824//catalytic activity;GO:0097367//carbohydrate derivative binding;GO:0005488//binding;GO:0032550//purine ribonucleoside binding;GO:0001882//nucleoside binding;GO:0003676//nucleic acid binding;GO:0016829//lyase activity;GO:0060089//molecular transducer activity;GO:00…	GO:0009987//cellular process;GO:0006259//DNA metabolic process;GO:0044237//cellular metabolic process;GO:0043412//macromolecule modification;GO:0090304//nucleic acid metabolic process;GO:0008152//metabolic process;GO:0050789//regulation of biological process;GO:0071704//organic substance metabolic process;GO:0050794//regulation of cellular process;GO:0036211//protein modification process;GO:00064…
101248270	74	19	4.75	1.29	-1.88056	4.92e-08	6.95e-07	yes	XP_004251770.1	PREDICTED: adenylate kinase 5, chloroplastic isoform X1 [Solanum lycopersicum]	Metabolism	Nucleotide metabolism	ko00230//Purine metabolism	K00939	GO:0043227//membrane-bounded organelle;GO:0043226//organelle;GO:0009526//plastid envelope;GO:0044422//organelle part;GO:0044424//intracellular part;GO:0031976//plastid thylakoid;GO:0009536//plastid;GO:0044446//intracellular organelle part;GO:0031984//organelle subcompartment;GO:0044434//chloroplast part;GO:0044444//cytoplasmic part;GO:0043229//intracellular organelle;GO:0043231//intracellular mem…	GO:0016301//kinase activity;GO:0036094//small molecule binding;GO:0032550//purine ribonucleoside binding;GO:0019205//nucleobase-containing compound kinase activity;GO:0001882//nucleoside binding;GO:1901363//heterocyclic compound binding;GO:0097159//organic cyclic compound binding;GO:0032549//ribonucleoside binding;GO:0016740//transferase activity;GO:0001883//purine nucleoside binding;GO:0005488//…	GO:0009987//cellular process;GO:0090304//nucleic acid metabolic process;GO:1901362//organic cyclic compound biosynthetic process;GO:0006807//nitrogen compound metabolic process;GO:0055086//nucleobase-containing small molecule metabolic process;GO:0006725//cellular aromatic compound metabolic process;GO:0016070//RNA metabolic process;GO:0009058//biosynthetic process;GO:1901576//organic substance b…
101248294	78	26	8.93	3.14	-1.5079	1.53e-06	1.7e-05	yes	XP_004238822.1	PREDICTED: myb family transcription factor APL-like [Solanum tuberosum]	-	-	-	-	-	GO:0001071//nucleic acid binding transcription factor activity;GO:0005488//binding;GO:1901363//heterocyclic compound binding;GO:0097159//organic cyclic compound binding;GO:0003676//nucleic acid binding	GO:0065007//biological regulation;GO:0019222//regulation of metabolic process;GO:0009719//response to endogenous stimulus;GO:0032870//cellular response to hormone stimulus;GO:0051716//cellular response to stimulus;GO:0070887//cellular response to chemical stimulus;GO:0071495//cellular response to endogenous stimulus;GO:0007165//signal transduction;GO:0050794//regulation of cellular process;GO:004…
101248306	68	227	5.24	18.46	1.81676	7.2e-23	4.18e-21	yes	XP_004241226.1	PREDICTED: cytochrome P450 71A9-like [Solanum lycopersicum]	-	-	-	-	GO:0016020//membrane	GO:0016491//oxidoreductase activity;GO:0003824//catalytic activity;GO:0043169//cation binding;GO:0046906//tetrapyrrole binding;GO:0097159//organic cyclic compound binding;GO:0043167//ion binding;GO:0005488//binding;GO:1901363//heterocyclic compound binding;GO:0046872//metal ion binding;GO:0046914//transition metal ion binding	GO:0044699//single-organism process;GO:0044710//single-organism metabolic process;GO:0008152//metabolic process
101248360	6	21	2.38	8.8	1.88654	0.00595708	0.0268646	yes	XP_010313728.1	serine-rich family protein [Populus trichocarpa]	-	-	-	-	-	-	-
101248402	22	103	1.7	8.38	2.30142	1.49e-14	4.5e-13	yes	XP_004242219.2	PREDICTED: cytochrome P450 71D7-like [Solanum lycopersicum]	-	-	-	-	-	GO:0046914//transition metal ion binding;GO:1901363//heterocyclic compound binding;GO:0016491//oxidoreductase activity;GO:0097159//organic cyclic compound binding;GO:0046906//tetrapyrrole binding;GO:0043167//ion binding;GO:0046872//metal ion binding;GO:0003824//catalytic activity;GO:0043169//cation binding;GO:0005488//binding	GO:0044699//single-organism process;GO:0008152//metabolic process;GO:0044710//single-organism metabolic process
101248412	38	7	4.79	0.93	-2.36472	5.42e-06	5.43e-05	yes	XP_004228714.1	PREDICTED: transmembrane protein 45A-like [Nicotiana tomentosiformis]	-	-	-	-	-	-	-
101248428	36	86	2.74	6.91	1.33451	2.08e-06	2.25e-05	yes	XP_004248201.1	PREDICTED: cytochrome P450 CYP72A219-like [Solanum lycopersicum]	-	-	-	-	-	GO:0016491//oxidoreductase activity;GO:0043169//cation binding;GO:0003824//catalytic activity;GO:0046872//metal ion binding;GO:0046906//tetrapyrrole binding;GO:0005488//binding;GO:0046914//transition metal ion binding;GO:0043167//ion binding;GO:1901363//heterocyclic compound binding;GO:0097159//organic cyclic compound binding	GO:0008152//metabolic process;GO:0044699//single-organism process;GO:0044710//single-organism metabolic process
101248447	4	23	0.34	2.04	2.58496	0.000313464	0.00211471	yes	XP_004250481.1	PREDICTED: crocetin glucoside glucosyltransferase-like [Solanum lycopersicum]	Metabolism	Biosynthesis of other secondary metabolites	ko00942//Anthocyanin biosynthesis	K12937	-	GO:0016757//transferase activity, transferring glycosyl groups;GO:0016740//transferase activity;GO:0003824//catalytic activity	-
101248507	109	257	23.19	57.69	1.31482	1.69e-16	6.18e-15	yes	XP_004245742.1	PREDICTED: adenine phosphoribosyltransferase 4 [Solanum lycopersicum]	Metabolism	Nucleotide metabolism	ko00230//Purine metabolism	K00759	GO:0005622//intracellular;GO:0044464//cell part;GO:0005623//cell;GO:0044424//intracellular part	GO:0016763//transferase activity, transferring pentosyl groups;GO:0003824//catalytic activity;GO:0016757//transferase activity, transferring glycosyl groups;GO:0016740//transferase activity	GO:0044711//single-organism biosynthetic process;GO:1901362//organic cyclic compound biosynthetic process;GO:0046112//nucleobase biosynthetic process;GO:0046483//heterocycle metabolic process;GO:0008152//metabolic process;GO:0071704//organic substance metabolic process;GO:0044238//primary metabolic process;GO:0072521//purine-containing compound metabolic process;GO:0044710//single-organism metabo…
101248643	36	12	5.5	1.93	-1.51083	0.00110289	0.00638716	yes	XP_004233970.1	PREDICTED: GATA transcription factor 18-like [Solanum lycopersicum]	-	-	-	-	-	GO:0001071//nucleic acid binding transcription factor activity;GO:0097159//organic cyclic compound binding;GO:0046914//transition metal ion binding;GO:0003677//DNA binding;GO:0005488//binding;GO:0046872//metal ion binding;GO:0043169//cation binding;GO:0043167//ion binding;GO:1901363//heterocyclic compound binding;GO:0003676//nucleic acid binding	GO:0044707//single-multicellular organism process;GO:0007275//multicellular organism development;GO:0032502//developmental process;GO:0019222//regulation of metabolic process;GO:0065007//biological regulation;GO:0044767//single-organism developmental process;GO:0032501//multicellular organismal process;GO:0010468//regulation of gene expression;GO:0044699//single-organism process;GO:0048856//anato…
101248647	10	32	1.79	6.03	1.7522	0.000614054	0.00384419	yes	XP_004234308.1	PREDICTED: serine protease inhibitor 5-like [Solanum lycopersicum]	-	-	-	-	-	GO:0061134//peptidase regulator activity;GO:0061135//endopeptidase regulator activity;GO:0004857//enzyme inhibitor activity;GO:0030234//enzyme regulator activity;GO:0098772//molecular function regulator;GO:0030414//peptidase inhibitor activity	GO:0050794//regulation of cellular process;GO:0065009//regulation of molecular function;GO:0010466//negative regulation of peptidase activity;GO:0052547//regulation of peptidase activity;GO:0010605//negative regulation of macromolecule metabolic process;GO:0060255//regulation of macromolecule metabolic process;GO:0080090//regulation of primary metabolic process;GO:0045861//negative regulation of …
101248657	91.59	238.88	9.39	25.85	1.46097	7.69e-18	3.1e-16	yes	XP_004252862.1	PREDICTED: omega-6 fatty acid desaturase, endoplasmic reticulum isozyme 2-like isoform X1 [Solanum lycopersicum]	Metabolism	Global and Overview;Lipid metabolism	ko01212//Fatty acid metabolism;ko01040//Biosynthesis of unsaturated fatty acids	K10256	-	GO:0003824//catalytic activity;GO:0016491//oxidoreductase activity;GO:0016705//oxidoreductase activity, acting on paired donors, with incorporation or reduction of molecular oxygen	GO:0044699//single-organism process;GO:0044710//single-organism metabolic process;GO:0044238//primary metabolic process;GO:0008152//metabolic process
101248665	22	52	3.1	7.74	1.32007	0.000263136	0.00182526	yes	XP_004237044.1	PREDICTED: NAC transcription factor 29-like [Solanum lycopersicum]	-	-	-	-	GO:0005622//intracellular;GO:0043231//intracellular membrane-bounded organelle;GO:0043226//organelle;GO:0005623//cell;GO:0044424//intracellular part;GO:0044464//cell part;GO:0043227//membrane-bounded organelle;GO:0043229//intracellular organelle	GO:0097159//organic cyclic compound binding;GO:1901363//heterocyclic compound binding;GO:0005488//binding;GO:0003676//nucleic acid binding	GO:0044249//cellular biosynthetic process;GO:0034645//cellular macromolecule biosynthetic process;GO:0009987//cellular process;GO:0009059//macromolecule biosynthetic process;GO:0060255//regulation of macromolecule metabolic process;GO:0048367//shoot system development;GO:0007275//multicellular organism development;GO:0044260//cellular macromolecule metabolic process;GO:0048731//system development…
101248692	57	25	6.87	3.18	-1.11128	0.00124843	0.00710638	yes	NP_001266266.1	probable WRKY transcription factor 71-like [Solanum lycopersicum]	-	-	-	-	-	GO:1901363//heterocyclic compound binding;GO:0001071//nucleic acid binding transcription factor activity;GO:0097159//organic cyclic compound binding;GO:0003676//nucleic acid binding;GO:0005488//binding;GO:0003677//DNA binding	GO:0019222//regulation of metabolic process;GO:0065007//biological regulation;GO:0050789//regulation of biological process;GO:0060255//regulation of macromolecule metabolic process;GO:0010468//regulation of gene expression
101248700	15	154	1.16	12.53	3.43319	1.47e-31	1.4e-29	yes	XP_004246079.1	PREDICTED: cytochrome P450 71D7-like [Solanum lycopersicum]	-	-	-	-	-	GO:1901363//heterocyclic compound binding;GO:0043167//ion binding;GO:0046872//metal ion binding;GO:0046914//transition metal ion binding;GO:0046906//tetrapyrrole binding;GO:0003824//catalytic activity;GO:0097159//organic cyclic compound binding;GO:0005488//binding;GO:0016491//oxidoreductase activity;GO:0043169//cation binding	GO:0044699//single-organism process;GO:0044710//single-organism metabolic process;GO:0008152//metabolic process
101248705	15	2	1.15	0.16	-2.84549	0.0023592	0.0122588	yes	XP_010327634.1	PREDICTED: protein IQ-DOMAIN 14-like [Solanum lycopersicum]	-	-	-	-	-	-	-
101248713	24	5	1.64	0.36	-2.18763	0.00091941	0.00547246	yes	XP_004247508.1	PREDICTED: cation/calcium exchanger 1 [Solanum lycopersicum]	-	-	-	-	GO:0044425//membrane part;GO:0005622//intracellular;GO:0043229//intracellular organelle;GO:0043231//intracellular membrane-bounded organelle;GO:0043226//organelle;GO:0031224//intrinsic component of membrane;GO:0005623//cell;GO:0044424//intracellular part;GO:0043227//membrane-bounded organelle;GO:0044464//cell part;GO:0016020//membrane;GO:0044422//organelle part;GO:0031090//organelle membrane	GO:0022804//active transmembrane transporter activity;GO:0005215//transporter activity;GO:0022857//transmembrane transporter activity;GO:0015291//secondary active transmembrane transporter activity	GO:0044710//single-organism metabolic process;GO:0044238//primary metabolic process;GO:0032502//developmental process;GO:1901564//organonitrogen compound metabolic process;GO:0019752//carboxylic acid metabolic process;GO:0071704//organic substance metabolic process;GO:1902578//single-organism localization;GO:0030001//metal ion transport;GO:0006520//cellular amino acid metabolic process;GO:0051179…
101248856	139	287	20.27	44.15	1.12307	1.39e-14	4.22e-13	yes	XP_004252716.1	RSI2 [Solanum tuberosum]	-	-	-	-	-	-	-
101248867	3	13.5	0.39	1.84	2.23816	0.0127622	0.0497476	yes	XP_010318939.1	PREDICTED: alpha-N-acetylglucosaminidase-like [Solanum lycopersicum]	Metabolism	Glycan biosynthesis and metabolism	ko00531//Glycosaminoglycan degradation	K01205	-	GO:0016798//hydrolase activity, acting on glycosyl bonds;GO:0003824//catalytic activity;GO:0004553//hydrolase activity, hydrolyzing O-glycosyl compounds;GO:0016787//hydrolase activity;GO:0015929//hexosaminidase activity	-
101248874	31	11	2.93	1.12	-1.3874	0.0043629	0.0206979	yes	XP_010320880.1	PREDICTED: eukaryotic translation initiation factor 5B isoform X1 [Solanum lycopersicum]	-	-	-	-	-	-	-
101248895	371	125	13.06	4.64	-1.49296	6.08e-26	4.22e-24	yes	XP_019070534.1	PREDICTED: microtubule-associated protein futsch-like [Solanum tuberosum]	-	-	-	-	-	-	-
101248904	18	3	2.12	0.37	-2.51847	0.00149764	0.00834506	yes	XP_004246148.1	PREDICTED: NAC domain-containing protein 7 [Solanum lycopersicum]	-	-	-	-	-	-	GO:0044260//cellular macromolecule metabolic process;GO:0044249//cellular biosynthetic process;GO:0034645//cellular macromolecule biosynthetic process;GO:0009059//macromolecule biosynthetic process;GO:0044237//cellular metabolic process;GO:0071704//organic substance metabolic process;GO:0009987//cellular process;GO:0009058//biosynthetic process;GO:0008152//metabolic process;GO:0010467//gene expre…
101248947	16	4	3.42	0.9	-1.926	0.0118586	0.0467902	yes	XP_004234252.1	BnaC03g58960D [Brassica napus]	-	-	-	-	GO:0043231//intracellular membrane-bounded organelle;GO:0005622//intracellular;GO:0044464//cell part;GO:0044424//intracellular part;GO:0005737//cytoplasm;GO:0043227//membrane-bounded organelle;GO:0043226//organelle;GO:0009536//plastid;GO:0044444//cytoplasmic part;GO:0043229//intracellular organelle;GO:0005623//cell	-	-
101248969	17	4	0.79	0.2	-1.98185	0.00722652	0.0315061	yes	XP_004238395.1	PREDICTED: phospholipase D delta-like [Solanum lycopersicum]	Cellular Processes;Metabolism	Transport and catabolism;Lipid metabolism	ko04144//Endocytosis;ko00564//Glycerophospholipid metabolism;ko00565//Ether lipid metabolism	K01115	-	GO:0046872//metal ion binding;GO:0016788//hydrolase activity, acting on ester bonds;GO:0043167//ion binding;GO:0043169//cation binding;GO:0016787//hydrolase activity;GO:0003824//catalytic activity;GO:0004620//phospholipase activity;GO:0016298//lipase activity;GO:0005488//binding	GO:0071704//organic substance metabolic process;GO:0006650//glycerophospholipid metabolic process;GO:0019637//organophosphate metabolic process;GO:0044710//single-organism metabolic process;GO:0008152//metabolic process;GO:0006629//lipid metabolic process;GO:0044238//primary metabolic process;GO:0009987//cellular process;GO:0044255//cellular lipid metabolic process;GO:0006793//phosphorus metaboli…
101248998	63	130	3.45	7.51	1.12222	2.89e-07	3.59e-06	yes	XP_004245999.1	PREDICTED: urea-proton symporter DUR3 [Solanum lycopersicum]	-	-	-	-	GO:0031224//intrinsic component of membrane;GO:0016020//membrane;GO:0044425//membrane part	GO:0022891//substrate-specific transmembrane transporter activity;GO:0022857//transmembrane transporter activity;GO:0015291//secondary active transmembrane transporter activity;GO:0022892//substrate-specific transporter activity;GO:0005215//transporter activity;GO:0022804//active transmembrane transporter activity;GO:0042887//amide transmembrane transporter activity	GO:0015840//urea transport;GO:0044763//single-organism cellular process;GO:0051179//localization;GO:0071705//nitrogen compound transport;GO:0044699//single-organism process;GO:0009987//cellular process;GO:0019755//one-carbon compound transport;GO:0071702//organic substance transport;GO:0006810//transport;GO:0051234//establishment of localization;GO:1902578//single-organism localization;GO:0042886…
101249002	415	181	56.49	26	-1.11948	5.86e-19	2.62e-17	yes	XP_004246325.1	PREDICTED: chlorophyll a-b binding protein CP29.1, chloroplastic [Solanum lycopersicum]	Metabolism	Energy metabolism	ko00196//Photosynthesis - antenna proteins	K08915	GO:0044464//cell part;GO:0043231//intracellular membrane-bounded organelle;GO:0044436//thylakoid part;GO:0044425//membrane part;GO:0005622//intracellular;GO:0098796//membrane protein complex;GO:0016020//membrane;GO:0032991//macromolecular complex;GO:0009579//thylakoid;GO:0005737//cytoplasm;GO:0034357//photosynthetic membrane;GO:0044444//cytoplasmic part;GO:0005623//cell;GO:0043226//organelle;GO:0…	GO:0097159//organic cyclic compound binding;GO:0043167//ion binding;GO:0046906//tetrapyrrole binding;GO:1901363//heterocyclic compound binding;GO:0043169//cation binding;GO:0005488//binding	GO:0006091//generation of precursor metabolites and energy;GO:0009987//cellular process;GO:0043412//macromolecule modification;GO:0043170//macromolecule metabolic process;GO:0036211//protein modification process;GO:0071704//organic substance metabolic process;GO:0044238//primary metabolic process;GO:0044237//cellular metabolic process;GO:0044267//cellular protein metabolic process;GO:0008152//met…
101249073	143	65	16.72	8.02	-1.0599	4.92e-07	5.9e-06	yes	XP_004238222.1	PREDICTED: calcium uniporter protein 4, mitochondrial [Vitis vinifera]	-	-	-	-	-	-	-
101249108	9	34	0.67	2.68	2	0.000107819	0.000828038	yes	XP_004244749.1	Os11g0264500 [Oryza sativa Japonica Group]	-	-	-	-	-	-	-
101249114	14	1	0.89	0.07	-3.66838	0.000980413	0.00576871	yes	XP_004245660.1	PREDICTED: molybdenum cofactor sulfurase-like [Solanum lycopersicum]	-	-	-	-	-	GO:0043168//anion binding;GO:0043167//ion binding;GO:0005488//binding	GO:0009719//response to endogenous stimulus;GO:0051179//localization;GO:0010941//regulation of cell death;GO:1902578//single-organism localization;GO:0009617//response to bacterium;GO:0071704//organic substance metabolic process;GO:0046907//intracellular transport;GO:0071702//organic substance transport;GO:0044710//single-organism metabolic process;GO:0050896//response to stimulus;GO:0032787//mon…
101249132	78	24	4.75	1.54	-1.625	3.97e-07	4.83e-06	yes	XP_019068027.1	PREDICTED: mitogen-activated protein kinase kinase kinase YODA isoform X1 [Solanum lycopersicum]	-	-	-	-	-	GO:0001882//nucleoside binding;GO:0016740//transferase activity;GO:0005488//binding;GO:0097159//organic cyclic compound binding;GO:0032549//ribonucleoside binding;GO:0016772//transferase activity, transferring phosphorus-containing groups;GO:1901363//heterocyclic compound binding;GO:0036094//small molecule binding;GO:0016301//kinase activity;GO:0003824//catalytic activity;GO:0032550//purine ribon…	GO:0008152//metabolic process;GO:0006464//cellular protein modification process;GO:0071704//organic substance metabolic process;GO:0036211//protein modification process;GO:0006793//phosphorus metabolic process;GO:0044260//cellular macromolecule metabolic process;GO:0019538//protein metabolic process;GO:0043170//macromolecule metabolic process;GO:0043412//macromolecule modification;GO:0009987//cel…
101249182	27	55	2.33	5	1.1016	0.00124843	0.00710638	yes	XP_004242069.2	PREDICTED: UDP-glucose iridoid glucosyltransferase-like [Solanum lycopersicum]	-	-	-	-	-	GO:0016757//transferase activity, transferring glycosyl groups;GO:0003824//catalytic activity;GO:0016740//transferase activity	-
101249191	19	57	1.45	4.6	1.66558	4.9e-06	4.95e-05	yes	XP_004244600.1	PREDICTED: MATE efflux family protein 5-like [Solanum lycopersicum]	-	-	-	-	GO:0044425//membrane part;GO:0031224//intrinsic component of membrane;GO:0016020//membrane	GO:0005215//transporter activity;GO:0015291//secondary active transmembrane transporter activity;GO:0022804//active transmembrane transporter activity;GO:0022857//transmembrane transporter activity	GO:0051179//localization;GO:0050896//response to stimulus;GO:0044765//single-organism transport;GO:0044763//single-organism cellular process;GO:0051234//establishment of localization;GO:0006810//transport;GO:0042493//response to drug;GO:0042221//response to chemical;GO:0015893//drug transport;GO:1902578//single-organism localization;GO:0044699//single-organism process;GO:0009987//cellular process
101249284	19	40	6.01	13.36	1.15248	0.00384456	0.0186305	yes	XP_004244435.1	PREDICTED: upstream activation factor subunit UAF30-like [Solanum lycopersicum]	-	-	-	-	GO:0043229//intracellular organelle;GO:0044464//cell part;GO:0043227//membrane-bounded organelle;GO:0043231//intracellular membrane-bounded organelle;GO:0043226//organelle;GO:0005622//intracellular;GO:0044424//intracellular part;GO:0005623//cell	-	-
101249327	50	9	18.37	3.49	-2.39605	9.32e-08	1.26e-06	yes	XP_004251022.1	Stress responsive A/B Barrel Domain [Theobroma cacao]	-	-	-	-	GO:0043229//intracellular organelle;GO:0044464//cell part;GO:0044424//intracellular part;GO:0044444//cytoplasmic part;GO:0005622//intracellular;GO:0009536//plastid;GO:0005737//cytoplasm;GO:0043226//organelle;GO:0043231//intracellular membrane-bounded organelle;GO:0043227//membrane-bounded organelle;GO:0005623//cell	GO:0005488//binding;GO:0043167//ion binding;GO:0043169//cation binding	-
101249358	42	155	4.08	15.88	1.96057	1.23e-17	4.87e-16	yes	XP_004238911.1	Core-2/I-branching beta-1,6-N-acetylglucosaminyltransferase family protein isoform 1 [Theobroma cacao]	-	-	-	-	-	GO:0016757//transferase activity, transferring glycosyl groups;GO:0003824//catalytic activity;GO:0016740//transferase activity	-
101249389	278	128	24.77	12.03	-1.04196	4.61e-12	1.09e-10	yes	XP_004244824.1	PREDICTED: deacetylvindoline O-acetyltransferase-like [Solanum lycopersicum]	Metabolism	Biosynthesis of other secondary metabolites	ko00940//Phenylpropanoid biosynthesis;ko00941//Flavonoid biosynthesis;ko00945//Stilbenoid, diarylheptanoid and gingerol biosynthesis	K13065	-	GO:0016740//transferase activity;GO:0003824//catalytic activity;GO:0016746//transferase activity, transferring acyl groups	-
101249431	11	30	2.75	7.9	1.52242	0.002916	0.0147139	yes	XP_004233839.3	PREDICTED: homeobox-leucine zipper protein ATHB-52 [Solanum lycopersicum]	-	-	-	-	GO:0044424//intracellular part;GO:0043227//membrane-bounded organelle;GO:0005623//cell;GO:0043229//intracellular organelle;GO:0043231//intracellular membrane-bounded organelle;GO:0005622//intracellular;GO:0044464//cell part;GO:0043226//organelle	GO:0005488//binding;GO:0003677//DNA binding;GO:0003676//nucleic acid binding;GO:1901363//heterocyclic compound binding;GO:0097159//organic cyclic compound binding	GO:0019222//regulation of metabolic process;GO:0065007//biological regulation;GO:0060255//regulation of macromolecule metabolic process;GO:0010468//regulation of gene expression;GO:0050789//regulation of biological process
101249450	40	17	2.36	1.06	-1.15472	0.0075924	0.0327973	yes	XP_004236517.1	PREDICTED: ABC transporter G family member 23 isoform X1 [Solanum lycopersicum]	-	-	-	-	GO:0044425//membrane part;GO:0016020//membrane;GO:0031224//intrinsic component of membrane	GO:0097367//carbohydrate derivative binding;GO:1901363//heterocyclic compound binding;GO:0005215//transporter activity;GO:0032549//ribonucleoside binding;GO:0016818//hydrolase activity, acting on acid anhydrides, in phosphorus-containing anhydrides;GO:0016817//hydrolase activity, acting on acid anhydrides;GO:0001882//nucleoside binding;GO:0017111//nucleoside-triphosphatase activity;GO:0001883//pu…	GO:0051234//establishment of localization;GO:1902578//single-organism localization;GO:0051179//localization;GO:0044765//single-organism transport;GO:0044699//single-organism process;GO:0006810//transport
101249458	58	22	3.22	1.29	-1.31969	0.000188488	0.00136293	yes	XP_004239489.1	BnaC06g28940D [Brassica napus]	-	-	-	-	-	-	-
101249481	20	48	2.1	5.31	1.33832	0.000366088	0.00243257	yes	XP_004246497.1	PREDICTED: 1-aminocyclopropane-1-carboxylate oxidase homolog 1-like [Solanum lycopersicum]	-	-	-	-	-	GO:0043167//ion binding;GO:0003824//catalytic activity;GO:0016705//oxidoreductase activity, acting on paired donors, with incorporation or reduction of molecular oxygen;GO:0046914//transition metal ion binding;GO:0043169//cation binding;GO:0016491//oxidoreductase activity;GO:0005488//binding;GO:0046872//metal ion binding;GO:0051213//dioxygenase activity;GO:0016706//oxidoreductase activity, acting…	GO:0008152//metabolic process;GO:0044699//single-organism process;GO:0044710//single-organism metabolic process
101249482	760	258	123.29	44.16	-1.48124	7.21e-50	1.39e-47	yes	XP_004246666.1	PREDICTED: fasciclin-like arabinogalactan protein 12 [Solanum lycopersicum]	-	-	-	-	-	-	-
101249485	116	27	2.05	0.5	-2.03562	1.97e-13	5.34e-12	yes	XP_004229119.1	PREDICTED: phragmoplast orienting kinesin-1 isoform X1 [Solanum lycopersicum]	-	-	-	-	GO:0044464//cell part;GO:0005623//cell;GO:0005622//intracellular;GO:0044424//intracellular part	GO:0005488//binding	GO:0044699//single-organism process;GO:0044763//single-organism cellular process;GO:0009987//cellular process
101249502	17	1	0.77	0.05	-3.94486	0.000145836	0.00108348	yes	XP_004248939.1	bHLH family protein [Populus trichocarpa]	-	-	-	-	-	-	-
101249533	101	45	11.99	5.64	-1.08806	2.16e-05	0.000192318	yes	XP_004252536.1	PREDICTED: anaphase-promoting complex subunit cdh1-like [Solanum tuberosum]	-	-	-	-	-	-	-
101249575	13	49	2.14	8.49	1.98815	1.26e-06	1.41e-05	yes	XP_004229344.1	cysteine/histidine-rich DC1 domain protein [Capsicum annuum]	-	-	-	-	-	GO:0016491//oxidoreductase activity;GO:0016651//oxidoreductase activity, acting on NAD(P)H;GO:0016667//oxidoreductase activity, acting on a sulfur group of donors;GO:0016668//oxidoreductase activity, acting on a sulfur group of donors, NAD(P) as acceptor;GO:0003824//catalytic activity	GO:0044699//single-organism process;GO:0044710//single-organism metabolic process;GO:0008152//metabolic process
101249597	59	19	13.84	4.7	-1.55811	2.02e-05	0.000181611	yes	XP_004249990.1	PREDICTED: calponin homology domain-containing protein DDB_G0272472 [Solanum lycopersicum]	-	-	-	-	-	-	-
101249686	101	212	12.33	27.3	1.14673	2.43e-11	5.3e-10	yes	XP_004248661.1	PREDICTED: PI-PLC X-box domain-containing protein DDB_G0293730-like [Solanum lycopersicum]	-	-	-	-	-	GO:0016788//hydrolase activity, acting on ester bonds;GO:0042578//phosphoric ester hydrolase activity;GO:0003824//catalytic activity;GO:0016787//hydrolase activity	GO:0008152//metabolic process;GO:0044238//primary metabolic process
101249694	241	515	22.72	51.22	1.17274	4e-26	2.82e-24	yes	XP_004232051.1	PREDICTED: patatin-like protein 3 [Solanum lycopersicum]	-	-	-	-	-	GO:0003824//catalytic activity	GO:0008152//metabolic process;GO:0044699//single-organism process;GO:0071704//organic substance metabolic process;GO:0006629//lipid metabolic process;GO:0044710//single-organism metabolic process;GO:0044238//primary metabolic process
101249696	28	9	2.36	0.8	-1.56071	0.00396468	0.0191015	yes	XP_004250074.1	PREDICTED: omega-hydroxypalmitate O-feruloyl transferase [Solanum lycopersicum]	Metabolism	Lipid metabolism	ko00073//Cutin, suberine and wax biosynthesis	K15400	-	GO:0003824//catalytic activity;GO:0016740//transferase activity;GO:0016746//transferase activity, transferring acyl groups;GO:0016747//transferase activity, transferring acyl groups other than amino-acyl groups	-
101249699	23	7	2.54	0.81	-1.64883	0.00817489	0.034609	yes	XP_004250329.1	PREDICTED: flavonol synthase/flavanone 3-hydroxylase [Solanum lycopersicum]	Metabolism	Biosynthesis of other secondary metabolites	ko00941//Flavonoid biosynthesis	K05278	GO:0044464//cell part;GO:0005622//intracellular;GO:0005623//cell;GO:0044424//intracellular part	GO:0051213//dioxygenase activity;GO:0016705//oxidoreductase activity, acting on paired donors, with incorporation or reduction of molecular oxygen;GO:0046872//metal ion binding;GO:0043167//ion binding;GO:0005488//binding;GO:0046914//transition metal ion binding;GO:0036094//small molecule binding;GO:0016491//oxidoreductase activity;GO:0016706//oxidoreductase activity, acting on paired donors, with…	GO:0046148//pigment biosynthetic process;GO:0009813//flavonoid biosynthetic process;GO:0051552//flavone metabolic process;GO:0009812//flavonoid metabolic process;GO:0051553//flavone biosynthetic process;GO:0044699//single-organism process;GO:0009058//biosynthetic process;GO:1901576//organic substance biosynthetic process;GO:0044711//single-organism biosynthetic process;GO:0042440//pigment metabol…
101249731	17	1	1.32	0.08	-4.04439	0.000145836	0.00108348	yes	XP_010321432.1	PREDICTED: glycerol-3-phosphate acyltransferase 5-like [Solanum lycopersicum]	Metabolism	Lipid metabolism	ko00564//Glycerophospholipid metabolism;ko00561//Glycerolipid metabolism	K13508	-	GO:0016740//transferase activity;GO:0003824//catalytic activity	-
101249754	399	186	62.64	30.81	-1.02369	4.26e-16	1.48e-14	yes	XP_004246667.1	PREDICTED: fasciclin-like arabinogalactan protein 12 [Solanum lycopersicum]	-	-	-	-	-	-	-
101249777	109	48	9.76	4.53	-1.10737	6.82e-06	6.71e-05	yes	XP_010312360.2	PREDICTED: LOW QUALITY PROTEIN: ribulose bisphosphate carboxylase/oxygenase activase, chloroplastic-like [Solanum lycopersicum]	-	-	-	-	GO:0005622//intracellular;GO:0005737//cytoplasm;GO:0005623//cell;GO:0043227//membrane-bounded organelle;GO:0009532//plastid stroma;GO:0009536//plastid;GO:0044444//cytoplasmic part;GO:0044435//plastid part;GO:0044424//intracellular part;GO:0044464//cell part;GO:0044446//intracellular organelle part;GO:0043226//organelle;GO:0043231//intracellular membrane-bounded organelle;GO:0044422//organelle par…	GO:0097367//carbohydrate derivative binding;GO:0032550//purine ribonucleoside binding;GO:0001882//nucleoside binding;GO:0001883//purine nucleoside binding;GO:0036094//small molecule binding;GO:0032549//ribonucleoside binding;GO:0097159//organic cyclic compound binding;GO:1901363//heterocyclic compound binding;GO:0005488//binding	-
101249787	9	0	0.88	0.001	-9.78136	0.00391328	0.0188664	yes	NP_001333905.1	PREDICTED: fructose-bisphosphate aldolase 1, chloroplastic-like [Solanum lycopersicum]	Metabolism	Global and Overview;Energy metabolism;Carbohydrate metabolism	ko01200//Carbon metabolism;ko01230//Biosynthesis of amino acids;ko00010//Glycolysis / Gluconeogenesis;ko00710//Carbon fixation in photosynthetic organisms;ko00051//Fructose and mannose metabolism;ko00030//Pentose phosphate pathway	K01623	-	GO:0016829//lyase activity;GO:0016832//aldehyde-lyase activity;GO:0016830//carbon-carbon lyase activity;GO:0003824//catalytic activity	GO:0071704//organic substance metabolic process;GO:0006090//pyruvate metabolic process;GO:0044699//single-organism process;GO:0044237//cellular metabolic process;GO:0006082//organic acid metabolic process;GO:0032787//monocarboxylic acid metabolic process;GO:0019752//carboxylic acid metabolic process;GO:0009987//cellular process;GO:0008152//metabolic process;GO:0043436//oxoacid metabolic process;G…
101249789	173	48	38.93	11.4	-1.77185	3.8e-16	1.33e-14	yes	XP_004251024.1	PREDICTED: RAB6-interacting golgin-like [Solanum tuberosum]	-	-	-	-	-	-	GO:0044238//primary metabolic process;GO:0045491//xylan metabolic process;GO:0071704//organic substance metabolic process;GO:0044036//cell wall macromolecule metabolic process;GO:0005975//carbohydrate metabolic process;GO:0005976//polysaccharide metabolic process;GO:0010410//hemicellulose metabolic process;GO:0009987//cellular process;GO:0071554//cell wall organization or biogenesis;GO:0043170//m…
101249836	19	3	3.01	0.5	-2.58976	0.000860688	0.00516986	yes	XP_019070522.1	PREDICTED: cytochrome b561 domain-containing protein At4g18260 [Solanum lycopersicum]	-	-	-	-	GO:0044425//membrane part;GO:0016020//membrane;GO:0031224//intrinsic component of membrane	-	-
101249840	124	50	10.68	4.54	-1.23415	1.83e-07	2.35e-06	yes	XP_004244750.1	PREDICTED: protein SHORT-ROOT-like [Solanum lycopersicum]	-	-	-	-	GO:0005623//cell;GO:0005622//intracellular;GO:0043227//membrane-bounded organelle;GO:0043226//organelle;GO:0044424//intracellular part;GO:0043229//intracellular organelle;GO:0043231//intracellular membrane-bounded organelle;GO:0044464//cell part	GO:0003676//nucleic acid binding;GO:1901363//heterocyclic compound binding;GO:0003677//DNA binding;GO:0097159//organic cyclic compound binding;GO:0005488//binding;GO:0001071//nucleic acid binding transcription factor activity	GO:0009058//biosynthetic process;GO:0050789//regulation of biological process;GO:0065007//biological regulation;GO:0051301//cell division;GO:0044763//single-organism cellular process;GO:0044707//single-multicellular organism process;GO:0032502//developmental process;GO:0003002//regionalization;GO:0007275//multicellular organism development;GO:1901576//organic substance biosynthetic process;GO:006…
101249857	13	93	0.89	6.7	2.91228	4.13e-17	1.57e-15	yes	NP_001308118.1	PREDICTED: vicilin GC72-A [Solanum lycopersicum]	-	-	-	-	GO:0071944//cell periphery;GO:0005618//cell wall;GO:0030312//external encapsulating structure;GO:0005623//cell;GO:0044464//cell part	-	GO:0051707//response to other organism;GO:0065008//regulation of biological quality;GO:0009266//response to temperature stimulus;GO:0051704//multi-organism process;GO:0009607//response to biotic stimulus;GO:0032501//multicellular organismal process;GO:0065007//biological regulation;GO:0051179//localization;GO:0009605//response to external stimulus;GO:0043207//response to external biotic stimulus;…
101249904	45	19	6.08	2.71	-1.16578	0.00374401	0.0182234	yes	NP_001295218.1	PREDICTED: ACT domain-containing protein DS12, chloroplastic-like isoform X1 [Sesamum indicum]	-	-	-	-	-	GO:0031406//carboxylic acid binding;GO:0043168//anion binding;GO:0036094//small molecule binding;GO:0005488//binding;GO:0043177//organic acid binding;GO:0043167//ion binding	-
101249939	85	40	2.94	1.45	-1.01976	0.000213069	0.00151702	yes	XP_010324019.1	Phage-like element PBSX protein xkdP [Gossypium arboreum]	-	-	-	-	-	-	-
101249988	37	9	2.26	0.58	-1.9622	6.69e-05	0.000538495	yes	XP_004251402.1	PREDICTED: lysM domain receptor-like kinase 4 [Solanum lycopersicum]	-	-	-	-	-	GO:0001883//purine nucleoside binding;GO:0005488//binding;GO:0097367//carbohydrate derivative binding;GO:0003824//catalytic activity;GO:0032549//ribonucleoside binding;GO:0016740//transferase activity;GO:0001882//nucleoside binding;GO:0036094//small molecule binding;GO:1901363//heterocyclic compound binding;GO:0032550//purine ribonucleoside binding;GO:0016301//kinase activity;GO:0097159//organic …	GO:0006793//phosphorus metabolic process;GO:0006464//cellular protein modification process;GO:0044237//cellular metabolic process;GO:0043412//macromolecule modification;GO:0009987//cellular process;GO:0019538//protein metabolic process;GO:0008152//metabolic process;GO:0006796//phosphate-containing compound metabolic process;GO:0043170//macromolecule metabolic process;GO:0044267//cellular protein …
101249991	53	23	2.39	1.08	-1.14598	0.0017971	0.00971833	yes	XP_004251858.1	PREDICTED: protein SPA1-RELATED 4-like isoform X1 [Solanum lycopersicum]	-	-	-	-	-	GO:0016772//transferase activity, transferring phosphorus-containing groups;GO:0016740//transferase activity;GO:0003824//catalytic activity	-
101249993	117	40	11.61	4.19	-1.47035	8.12e-09	1.28e-07	yes	XP_010317715.1	PREDICTED: transcription repressor OFP7-like isoform X1 [Solanum lycopersicum]	-	-	-	-	-	-	-
101250002	9	0	0.54	0.001	-9.07682	0.00391328	0.0188664	yes	XP_004253124.1	PREDICTED: U-box domain-containing protein 15-like [Solanum lycopersicum]	-	-	-	-	-	GO:0019787//ubiquitin-like protein transferase activity;GO:0016740//transferase activity;GO:0003824//catalytic activity	GO:0070647//protein modification by small protein conjugation or removal;GO:0043412//macromolecule modification;GO:0009987//cellular process;GO:0032446//protein modification by small protein conjugation;GO:0008152//metabolic process;GO:0044237//cellular metabolic process;GO:0019538//protein metabolic process;GO:0044267//cellular protein metabolic process;GO:0071704//organic substance metabolic pr…
101250006	46	20	5.74	2.63	-1.12599	0.00433513	0.0205883	yes	XP_004253465.1	PREDICTED: probable 2-oxoglutarate-dependent dioxygenase AOP1.2 [Solanum lycopersicum]	-	-	-	-	-	GO:0043167//ion binding;GO:0016491//oxidoreductase activity;GO:0016705//oxidoreductase activity, acting on paired donors, with incorporation or reduction of molecular oxygen;GO:0005488//binding;GO:0003824//catalytic activity;GO:0043169//cation binding	GO:0044710//single-organism metabolic process;GO:0008152//metabolic process;GO:0044699//single-organism process
101250011	26	6	2.45	0.6	-2.02975	0.000885647	0.00529334	yes	XP_004237589.2	Seipin [Gossypium arboreum]	-	-	-	-	-	-	-
101250033	542	240	52.23	24.4	-1.098	1.52e-23	9.27e-22	yes	XP_004243539.1	PREDICTED: cytochrome b561 and DOMON domain-containing protein At2g04850 [Solanum lycopersicum]	-	-	-	-	GO:0044425//membrane part;GO:0016020//membrane;GO:0031224//intrinsic component of membrane	GO:0003824//catalytic activity;GO:0016491//oxidoreductase activity	GO:0044699//single-organism process;GO:0008152//metabolic process;GO:0044710//single-organism metabolic process
101250057	13	2	1.14	0.19	-2.58496	0.0074061	0.0321401	yes	XP_004248207.1	PREDICTED: protein TOO MANY MOUTHS [Solanum lycopersicum]	-	-	-	-	GO:0030312//external encapsulating structure;GO:0016020//membrane;GO:0071944//cell periphery;GO:0031224//intrinsic component of membrane;GO:0005623//cell;GO:0044425//membrane part;GO:0005618//cell wall;GO:0044464//cell part	-	GO:0048437//floral organ development;GO:0048367//shoot system development;GO:0090567//reproductive shoot system development;GO:0044707//single-multicellular organism process;GO:0003006//developmental process involved in reproduction;GO:0007275//multicellular organism development;GO:0009607//response to biotic stimulus;GO:0009886//post-embryonic morphogenesis;GO:0009791//post-embryonic development…
101250072	32	10	3.09	1.07	-1.53	0.00146635	0.00820231	yes	XP_004232617.1	PREDICTED: apyrase-like isoform X1 [Solanum lycopersicum]	Metabolism	Nucleotide metabolism	ko00230//Purine metabolism;ko00240//Pyrimidine metabolism	K14641	GO:0044425//membrane part;GO:0031224//intrinsic component of membrane;GO:0016020//membrane	GO:0032550//purine ribonucleoside binding;GO:0097159//organic cyclic compound binding;GO:1901363//heterocyclic compound binding;GO:0036094//small molecule binding;GO:0001882//nucleoside binding;GO:0097367//carbohydrate derivative binding;GO:0003824//catalytic activity;GO:0005488//binding;GO:0001883//purine nucleoside binding;GO:0032549//ribonucleoside binding	-
101250075	30	5	4.28	0.75	-2.51265	3.91e-05	0.000331237	yes	XP_004233130.1	BnaA04g20230D [Brassica napus]	-	-	-	-	-	-	-
101250097	24	4	5.19	0.91	-2.5118	0.000313464	0.00211471	yes	XP_004235372.1	PREDICTED: zinc-finger homeodomain protein 7-like [Solanum lycopersicum]	-	-	-	-	-	GO:0097159//organic cyclic compound binding;GO:1901363//heterocyclic compound binding;GO:0003676//nucleic acid binding;GO:0005488//binding	-
101250119	81	26	14.88	5.04	-1.56188	4.63e-07	5.58e-06	yes	XP_004239743.1	PREDICTED: protein LIGHT-DEPENDENT SHORT HYPOCOTYLS 1-like [Solanum lycopersicum]	-	-	-	-	-	-	-
101250148	14	3	2.44	0.55	-2.14938	0.0127622	0.0497476	yes	XP_004228875.1	PREDICTED: inactive protein RESTRICTED TEV MOVEMENT 2-like [Nicotiana tomentosiformis]	-	-	-	-	-	-	-
101250164	6	20	0.71	2.51	1.8218	0.00939996	0.0387346	yes	XP_004230394.1	PREDICTED: cinnamoyl-CoA reductase 1 [Solanum lycopersicum]	-	-	-	-	GO:0016020//membrane	GO:0016614//oxidoreductase activity, acting on CH-OH group of donors;GO:0005488//binding;GO:0048037//cofactor binding;GO:0016491//oxidoreductase activity;GO:0003824//catalytic activity;GO:0016616//oxidoreductase activity, acting on the CH-OH group of donors, NAD or NADP as acceptor	GO:0008152//metabolic process;GO:0044710//single-organism metabolic process;GO:0044699//single-organism process
101250177	52	16	4.84	1.57	-1.62424	4.58e-05	0.000381338	yes	XP_004232212.1	PREDICTED: myb-related protein 306 [Solanum lycopersicum]	-	-	-	-	-	GO:0005488//binding;GO:1901363//heterocyclic compound binding;GO:0003676//nucleic acid binding;GO:0097159//organic cyclic compound binding	-
101250187	38	13	3.44	1.24	-1.47207	0.000949698	0.00561414	yes	XP_004233698.1	PREDICTED: protein ALTERED XYLOGLUCAN 4-like [Solanum lycopersicum]	-	-	-	-	GO:0005623//cell;GO:0043229//intracellular organelle;GO:0005622//intracellular;GO:0043227//membrane-bounded organelle;GO:0043231//intracellular membrane-bounded organelle;GO:0044424//intracellular part;GO:0044464//cell part;GO:0043226//organelle	-	GO:0044264//cellular polysaccharide metabolic process;GO:0043170//macromolecule metabolic process;GO:0044238//primary metabolic process;GO:0009987//cellular process;GO:0044042//glucan metabolic process;GO:0005975//carbohydrate metabolic process;GO:0044262//cellular carbohydrate metabolic process;GO:0008152//metabolic process;GO:0044237//cellular metabolic process;GO:0005976//polysaccharide metabo…
101250247	122	358	28.79	89.13	1.63034	3.07e-30	2.8e-28	yes	XP_004228721.1	PREDICTED: protein PLANT CADMIUM RESISTANCE 2-like [Solanum lycopersicum]	-	-	-	-	-	-	-
101250258	140	58	41.61	18.19	-1.19378	4.84e-08	6.84e-07	yes	XP_004230988.1	BnaA09g43370D [Brassica napus]	-	-	-	-	GO:0031224//intrinsic component of membrane;GO:0016020//membrane;GO:0044425//membrane part	-	-
101250268	19	57	7.25	22.96	1.66307	4.9e-06	4.95e-05	yes	XP_004250331.1	PREDICTED: selenoprotein K [Solanum lycopersicum]	-	-	-	-	-	-	GO:0050896//response to stimulus;GO:0044700//single organism signaling;GO:0019538//protein metabolic process;GO:0044237//cellular metabolic process;GO:0009642//response to light intensity;GO:0042221//response to chemical;GO:0008152//metabolic process;GO:0009628//response to abiotic stimulus;GO:0071704//organic substance metabolic process;GO:0009987//cellular process;GO:0065007//biological regulat…
101250278	68	25	3.26	1.39	-1.22979	3.82e-05	0.000324173	yes	XP_010317540.1	PREDICTED: testis-expressed sequence 2 protein-like isoform X2 [Solanum lycopersicum]	-	-	-	-	GO:0044425//membrane part;GO:0031224//intrinsic component of membrane;GO:0016020//membrane	-	-
101250357	252	116	13.68	6.65	-1.04064	6.14e-11	1.28e-09	yes	XP_004232294.1	PREDICTED: tetratricopeptide repeat protein 28-like [Solanum lycopersicum]	-	-	-	-	GO:0016020//membrane	-	GO:0006950//response to stress;GO:0006952//defense response;GO:0050896//response to stimulus
101250383	95	37	10.13	4.16	-1.28398	1.83e-06	2e-05	yes	XP_019068541.1	PREDICTED: zinc finger protein NUTCRACKER-like [Solanum tuberosum]	-	-	-	-	-	GO:0097159//organic cyclic compound binding;GO:0043167//ion binding;GO:0005488//binding;GO:0043169//cation binding	-
101250431	117	27	6.05	1.47	-2.04112	1.23e-13	3.4e-12	yes	XP_004245496.1	PREDICTED: cellulose synthase-like protein G3 [Solanum lycopersicum]	-	-	-	-	GO:0016020//membrane;GO:0031224//intrinsic component of membrane;GO:0044425//membrane part	GO:0003824//catalytic activity;GO:0016757//transferase activity, transferring glycosyl groups;GO:0016759//cellulose synthase activity;GO:0016758//transferase activity, transferring hexosyl groups;GO:0046527//glucosyltransferase activity;GO:0016740//transferase activity	GO:0006073//cellular glucan metabolic process;GO:0008152//metabolic process;GO:0044264//cellular polysaccharide metabolic process;GO:0071704//organic substance metabolic process;GO:0044262//cellular carbohydrate metabolic process;GO:0009987//cellular process;GO:0005975//carbohydrate metabolic process;GO:0051273//beta-glucan metabolic process;GO:0044260//cellular macromolecule metabolic process;GO…
101250437	43	18	7.19	3.17	-1.18151	0.00450375	0.0212678	yes	XP_004228876.1	PREDICTED: inactive protein RESTRICTED TEV MOVEMENT 2-like [Solanum lycopersicum]	-	-	-	-	-	-	-
101250467	41	156	3.39	13.61	2.00531	3.09e-18	1.27e-16	yes	XP_004249992.1	PREDICTED: crocetin glucoside glucosyltransferase-like [Solanum lycopersicum]	-	-	-	-	-	GO:0016757//transferase activity, transferring glycosyl groups;GO:0003824//catalytic activity;GO:0016740//transferase activity	-
101250479	68	164	5.23	13.31	1.34763	2.52e-11	5.47e-10	yes	XP_004234549.1	PREDICTED: probable mitochondrial chaperone BCS1-A [Solanum lycopersicum]	-	-	-	-	-	GO:0036094//small molecule binding;GO:0001882//nucleoside binding;GO:0032550//purine ribonucleoside binding;GO:0001883//purine nucleoside binding;GO:1901363//heterocyclic compound binding;GO:0097159//organic cyclic compound binding;GO:0005488//binding;GO:0097367//carbohydrate derivative binding;GO:0032549//ribonucleoside binding	-
101250508	92	219	4.97	12.57	1.33867	2.2e-14	6.47e-13	yes	XP_004240080.1	PREDICTED: cyclic nucleotide-gated ion channel 1-like isoform X1 [Solanum lycopersicum]	Organismal Systems	Environmental adaptation	ko04626//Plant-pathogen interaction	K05391	GO:0044425//membrane part;GO:0031224//intrinsic component of membrane;GO:0016020//membrane	GO:0022857//transmembrane transporter activity;GO:0015075//ion transmembrane transporter activity;GO:0022892//substrate-specific transporter activity;GO:0022891//substrate-specific transmembrane transporter activity;GO:0005215//transporter activity	GO:0051179//localization;GO:0051234//establishment of localization;GO:1902578//single-organism localization;GO:0009987//cellular process;GO:0006810//transport;GO:0006811//ion transport;GO:0044765//single-organism transport;GO:0044699//single-organism process;GO:0044763//single-organism cellular process
101250520	50	22	4.85	2.25	-1.10806	0.00299352	0.0150525	yes	XP_004242499.1	calcineurin-like phosphoesterase family protein [Populus trichocarpa]	-	-	-	-	GO:0005737//cytoplasm;GO:0043229//intracellular organelle;GO:0044464//cell part;GO:0044424//intracellular part;GO:0042579//microbody;GO:0005622//intracellular;GO:0043231//intracellular membrane-bounded organelle;GO:0005623//cell;GO:0043227//membrane-bounded organelle;GO:0043226//organelle;GO:0044444//cytoplasmic part	GO:0003824//catalytic activity	GO:0019751//polyol metabolic process;GO:0044283//small molecule biosynthetic process;GO:0009987//cellular process;GO:0046165//alcohol biosynthetic process;GO:0044763//single-organism cellular process;GO:0006796//phosphate-containing compound metabolic process;GO:0044710//single-organism metabolic process;GO:0043647//inositol phosphate metabolic process;GO:1901615//organic hydroxy compound metabol…
101250535	84	36	5.5	2.49	-1.14329	4.76e-05	0.000395183	yes	XP_004246004.1	PREDICTED: probable carotenoid cleavage dioxygenase 4, chloroplastic [Solanum lycopersicum]	Metabolism	Metabolism of terpenoids and polyketides	ko00906//Carotenoid biosynthesis	K09840	GO:0044434//chloroplast part;GO:0043231//intracellular membrane-bounded organelle;GO:0044446//intracellular organelle part;GO:0044422//organelle part;GO:0009507//chloroplast;GO:0044444//cytoplasmic part;GO:0043226//organelle;GO:0044464//cell part;GO:0044424//intracellular part;GO:0005623//cell;GO:0009536//plastid;GO:0005622//intracellular;GO:0005737//cytoplasm;GO:0043227//membrane-bounded organel…	GO:0043167//ion binding;GO:0005488//binding;GO:0043169//cation binding;GO:0003824//catalytic activity;GO:0016491//oxidoreductase activity	GO:0044699//single-organism process;GO:0009813//flavonoid biosynthetic process;GO:0044710//single-organism metabolic process;GO:0008152//metabolic process;GO:0071704//organic substance metabolic process;GO:0009058//biosynthetic process;GO:1901576//organic substance biosynthetic process;GO:0009812//flavonoid metabolic process
101250559	127	389	9.87	31.89	1.69198	2.38e-34	2.58e-32	yes	XP_004231887.1	PREDICTED: cytochrome P450 81D1-like [Solanum lycopersicum]	Metabolism	Biosynthesis of other secondary metabolites	ko00943//Isoflavonoid biosynthesis	K13260	-	GO:0016491//oxidoreductase activity;GO:0003824//catalytic activity;GO:0046914//transition metal ion binding;GO:0046872//metal ion binding;GO:0043169//cation binding;GO:0097159//organic cyclic compound binding;GO:0043167//ion binding;GO:0046906//tetrapyrrole binding;GO:0005488//binding;GO:1901363//heterocyclic compound binding	GO:0044710//single-organism metabolic process;GO:0044699//single-organism process;GO:0008152//metabolic process
101250569	28	59	3.06	6.81	1.15412	0.000538925	0.00342538	yes	XP_004233627.1	PREDICTED: mitogen-activated protein kinase kinase kinase NPK1-like [Solanum lycopersicum]	-	-	-	-	-	GO:1901363//heterocyclic compound binding;GO:0016301//kinase activity;GO:0032550//purine ribonucleoside binding;GO:0036094//small molecule binding;GO:0001883//purine nucleoside binding;GO:0097367//carbohydrate derivative binding;GO:0016740//transferase activity;GO:0003824//catalytic activity;GO:0001882//nucleoside binding;GO:0004672//protein kinase activity;GO:0032549//ribonucleoside binding;GO:0…	GO:0008152//metabolic process;GO:0044238//primary metabolic process;GO:0009987//cellular process;GO:0044237//cellular metabolic process;GO:0036211//protein modification process;GO:0006464//cellular protein modification process;GO:0006796//phosphate-containing compound metabolic process;GO:0006793//phosphorus metabolic process;GO:0071704//organic substance metabolic process;GO:0019538//protein met…
101250572	9	32	0.74	2.77	1.90429	0.000275406	0.00189337	yes	XP_004251404.1	PREDICTED: deacetylvindoline O-acetyltransferase-like [Solanum lycopersicum]	Metabolism	Biosynthesis of other secondary metabolites	ko00940//Phenylpropanoid biosynthesis;ko00941//Flavonoid biosynthesis;ko00945//Stilbenoid, diarylheptanoid and gingerol biosynthesis	K13065	-	GO:0003824//catalytic activity;GO:0016740//transferase activity;GO:0016746//transferase activity, transferring acyl groups	-
101250647	605	235	42.21	17.3	-1.28681	5.74e-33	5.8e-31	yes	XP_004249583.1	PREDICTED: laccase-4-like [Solanum lycopersicum]	-	-	-	-	GO:0005576//extracellular region	GO:0046914//transition metal ion binding;GO:0016682//oxidoreductase activity, acting on diphenols and related substances as donors, oxygen as acceptor;GO:0005488//binding;GO:0043169//cation binding;GO:0016491//oxidoreductase activity;GO:0016679//oxidoreductase activity, acting on diphenols and related substances as donors;GO:0043167//ion binding;GO:0046872//metal ion binding;GO:0003824//catalytic…	GO:0008152//metabolic process;GO:0006725//cellular aromatic compound metabolic process;GO:0009987//cellular process;GO:0044710//single-organism metabolic process;GO:0009698//phenylpropanoid metabolic process;GO:0044237//cellular metabolic process;GO:0071704//organic substance metabolic process;GO:0009808//lignin metabolic process;GO:1901360//organic cyclic compound metabolic process;GO:0044763//s…
101250658	64	26	4.88	2.09	-1.22338	0.000193958	0.00139596	yes	XP_019066619.1	PREDICTED: MATE efflux family protein 1 [Solanum lycopersicum]	-	-	-	-	GO:0044425//membrane part;GO:0016020//membrane;GO:0031224//intrinsic component of membrane	GO:0022804//active transmembrane transporter activity;GO:0022857//transmembrane transporter activity;GO:0015291//secondary active transmembrane transporter activity;GO:0005215//transporter activity	GO:0016143//S-glycoside metabolic process;GO:0008152//metabolic process;GO:0050896//response to stimulus;GO:0019757//glycosinolate metabolic process;GO:0051179//localization;GO:1901657//glycosyl compound metabolic process;GO:1901659//glycosyl compound biosynthetic process;GO:0044765//single-organism transport;GO:0044249//cellular biosynthetic process;GO:0009058//biosynthetic process;GO:0044272//s…
101250666	11	1	3.13	0.3	-3.38313	0.00636217	0.0283546	yes	XP_004234393.1	PREDICTED: heavy metal-associated isoprenylated plant protein 26 [Solanum lycopersicum]	-	-	-	-	-	GO:0043169//cation binding;GO:0043167//ion binding;GO:0005488//binding	GO:0044765//single-organism transport;GO:1902578//single-organism localization;GO:0006810//transport;GO:0051179//localization;GO:0006812//cation transport;GO:0051234//establishment of localization;GO:0044699//single-organism process;GO:0006811//ion transport
101250702	171	72	15.24	6.77	-1.17064	3.97e-09	6.53e-08	yes	XP_004240931.1	PREDICTED: protein ESKIMO 1-like [Solanum lycopersicum]	-	-	-	-	-	-	GO:0009266//response to temperature stimulus;GO:0050896//response to stimulus;GO:0006950//response to stress;GO:0009628//response to abiotic stimulus;GO:0009409//response to cold
101250751	63	25	3.66	1.53	-1.25831	0.000162334	0.00119335	yes	XP_004231375.1	PREDICTED: mediator of RNA polymerase II transcription subunit 1 [Nicotiana tomentosiformis]	-	-	-	-	-	-	GO:0007017//microtubule-based process;GO:0007049//cell cycle;GO:0022402//cell cycle process;GO:0000278//mitotic cell cycle;GO:0044699//single-organism process;GO:0000910//cytokinesis;GO:0061640//cytoskeleton-dependent cytokinesis;GO:0009987//cellular process;GO:0000281//mitotic cytokinesis;GO:0044763//single-organism cellular process;GO:0051301//cell division;GO:1902410//mitotic cytokinetic proce…
101250764	38	13	4.08	1.47	-1.47275	0.000949698	0.00561414	yes	XP_004232789.1	PREDICTED: transcription factor MYB39 [Solanum lycopersicum]	-	-	-	-	-	GO:1901363//heterocyclic compound binding;GO:0003676//nucleic acid binding;GO:0097159//organic cyclic compound binding;GO:0005488//binding	-
101250820	69	21	2.4	0.76	-1.65896	2e-06	2.17e-05	yes	XP_010323639.1	BnaC08g29510D [Brassica napus]	-	-	-	-	-	-	-
101250853	692	227	68.56	23.73	-1.53066	5.48e-48	1.01e-45	yes	NP_001294934.1	fructose-bisphosphate aldolase 1, chloroplastic [Solanum lycopersicum]	Metabolism	Global and Overview;Energy metabolism;Carbohydrate metabolism	ko01200//Carbon metabolism;ko01230//Biosynthesis of amino acids;ko00010//Glycolysis / Gluconeogenesis;ko00710//Carbon fixation in photosynthetic organisms;ko00051//Fructose and mannose metabolism;ko00030//Pentose phosphate pathway	K01623	-	GO:0016832//aldehyde-lyase activity;GO:0016830//carbon-carbon lyase activity;GO:0003824//catalytic activity;GO:0016829//lyase activity	GO:0008152//metabolic process;GO:0044699//single-organism process;GO:0044710//single-organism metabolic process;GO:0019752//carboxylic acid metabolic process;GO:0044281//small molecule metabolic process;GO:0006090//pyruvate metabolic process;GO:0044763//single-organism cellular process;GO:0009987//cellular process;GO:0071704//organic substance metabolic process;GO:0044237//cellular metabolic proc…
101250893	14	2	1.18	0.18	-2.71272	0.00419502	0.0200505	yes	XP_004240227.2	PREDICTED: protein ESKIMO 1-like isoform X1 [Solanum lycopersicum]	-	-	-	-	-	-	GO:0009266//response to temperature stimulus;GO:0009409//response to cold;GO:0050896//response to stimulus;GO:0009628//response to abiotic stimulus;GO:0006950//response to stress
101250919	15	3	6.21	1.31	-2.24503	0.00756354	0.0327053	yes	XP_010319382.1	PREDICTED: mediator of RNA polymerase II transcription subunit 15a [Solanum lycopersicum]	-	-	-	-	-	GO:0000989//transcription factor activity, transcription factor binding;GO:0000988//transcription factor activity, protein binding	GO:0060255//regulation of macromolecule metabolic process;GO:0019222//regulation of metabolic process;GO:0050789//regulation of biological process;GO:0065007//biological regulation;GO:0010468//regulation of gene expression
101250920	0	11	0.001	1.79	10.8057	0.00097925	0.00576836	yes	XP_019071040.1	PREDICTED: diacylglycerol kinase theta-like [Nicotiana sylvestris]	-	-	-	-	-	-	GO:0044699//single-organism process
101250926	21	7	4.03	1.63	-1.30591	0.0126012	0.0492883	yes	XP_004247433.1	PREDICTED: alkylated DNA repair protein alkB homolog 8 isoform X1 [Solanum lycopersicum]	-	-	-	-	-	GO:0016705//oxidoreductase activity, acting on paired donors, with incorporation or reduction of molecular oxygen;GO:0016491//oxidoreductase activity;GO:0003824//catalytic activity	GO:0008152//metabolic process;GO:0044710//single-organism metabolic process;GO:0044699//single-organism process
101250945	26	7	2.16	0.61	-1.82415	0.0021191	0.0111994	yes	XP_019071670.1	PREDICTED: WRKY transcription factor 44 [Solanum lycopersicum]	Organismal Systems	Environmental adaptation	ko04626//Plant-pathogen interaction	K18835	-	-	GO:0032502//developmental process;GO:0009987//cellular process;GO:0044767//single-organism developmental process;GO:0044699//single-organism process
101250966	22	3	3.11	0.45	-2.78892	0.000157883	0.00116459	yes	NP_001309257.1	PREDICTED: methylesterase 10 isoform X1 [Solanum lycopersicum]	-	-	-	-	-	GO:0003824//catalytic activity	-
101251011	180	51	13.82	4.13	-1.74254	1.91e-16	6.93e-15	yes	XP_004244441.1	PREDICTED: premnaspirodiene oxygenase [Solanum lycopersicum]	-	-	-	-	-	GO:0003824//catalytic activity;GO:0046872//metal ion binding;GO:1901363//heterocyclic compound binding;GO:0005488//binding;GO:0097159//organic cyclic compound binding;GO:0043169//cation binding;GO:0046906//tetrapyrrole binding;GO:0046914//transition metal ion binding;GO:0043167//ion binding;GO:0016491//oxidoreductase activity	GO:0044710//single-organism metabolic process;GO:0044699//single-organism process;GO:0008152//metabolic process
101251043	9	0	1.1	0.001	-10.1033	0.00391328	0.0188664	yes	XP_004231152.1	PREDICTED: transcription factor GAMYB [Solanum lycopersicum]	-	-	-	-	-	GO:0097159//organic cyclic compound binding;GO:0003676//nucleic acid binding;GO:1901363//heterocyclic compound binding;GO:0005488//binding	-
101251053	50	7	2.72	0.4	-2.76553	7.78e-09	1.23e-07	yes	NP_001332799.1	PREDICTED: probable 1-deoxy-D-xylulose-5-phosphate synthase 2, chloroplastic [Solanum lycopersicum]	Metabolism	Metabolism of cofactors and vitamins;Metabolism of terpenoids and polyketides	ko00900//Terpenoid backbone biosynthesis;ko00730//Thiamine metabolism	K01662	-	GO:0016744//transferase activity, transferring aldehyde or ketonic groups;GO:0016740//transferase activity;GO:0003824//catalytic activity	GO:0009987//cellular process;GO:0006629//lipid metabolic process;GO:0044237//cellular metabolic process;GO:0071704//organic substance metabolic process;GO:0008152//metabolic process;GO:0044699//single-organism process;GO:0044238//primary metabolic process;GO:0006720//isoprenoid metabolic process;GO:0044763//single-organism cellular process;GO:0044255//cellular lipid metabolic process;GO:0044710//…
101251075	54	17	8.06	2.68	-1.58855	4e-05	0.000338425	yes	XP_004235794.1	PREDICTED: peptidyl-prolyl cis-trans isomerase FKBP17-2, chloroplastic-like [Solanum lycopersicum]	-	-	-	-	GO:0043229//intracellular organelle;GO:0044422//organelle part;GO:0044446//intracellular organelle part;GO:0044435//plastid part;GO:0031977//thylakoid lumen;GO:0044464//cell part;GO:0043226//organelle;GO:0005737//cytoplasm;GO:0005622//intracellular;GO:0031976//plastid thylakoid;GO:0044424//intracellular part;GO:0009579//thylakoid;GO:0044436//thylakoid part;GO:0005623//cell;GO:0043227//membrane-bo…	GO:0016853//isomerase activity;GO:0016859//cis-trans isomerase activity;GO:0003824//catalytic activity	GO:0019538//protein metabolic process;GO:0005982//starch metabolic process;GO:0005976//polysaccharide metabolic process;GO:0043412//macromolecule modification;GO:0044710//single-organism metabolic process;GO:0005975//carbohydrate metabolic process;GO:0008152//metabolic process;GO:0009311//oligosaccharide metabolic process;GO:0044763//single-organism cellular process;GO:0018208//peptidyl-proline m…
101251084	38	82	3.27	7.44	1.18601	2.45e-05	0.000215736	yes	XP_004237817.1	PREDICTED: ethylene-responsive transcription factor ABR1-like [Solanum lycopersicum]	-	-	-	-	GO:0005623//cell;GO:0044464//cell part;GO:0043227//membrane-bounded organelle;GO:0043229//intracellular organelle;GO:0043226//organelle;GO:0005622//intracellular;GO:0044424//intracellular part;GO:0043231//intracellular membrane-bounded organelle	GO:0005488//binding;GO:0003676//nucleic acid binding;GO:0001071//nucleic acid binding transcription factor activity;GO:1901363//heterocyclic compound binding;GO:0097159//organic cyclic compound binding	GO:0034645//cellular macromolecule biosynthetic process;GO:0009058//biosynthetic process;GO:0043170//macromolecule metabolic process;GO:0044260//cellular macromolecule metabolic process;GO:0060255//regulation of macromolecule metabolic process;GO:1901576//organic substance biosynthetic process;GO:0010468//regulation of gene expression;GO:0009987//cellular process;GO:0065007//biological regulation…
101251146	10	0	0.36	0.001	-8.49185	0.00195752	0.0104578	yes	XP_019067785.1	PREDICTED: leucine--tRNA ligase, cytoplasmic-like [Solanum tuberosum]	Genetic Information Processing	Translation	ko00970//Aminoacyl-tRNA biosynthesis	K01869	GO:0044464//cell part;GO:0005622//intracellular;GO:0005623//cell;GO:0044424//intracellular part	GO:0016876//ligase activity, forming aminoacyl-tRNA and related compounds;GO:0097367//carbohydrate derivative binding;GO:0016787//hydrolase activity;GO:0032550//purine ribonucleoside binding;GO:0001883//purine nucleoside binding;GO:0036094//small molecule binding;GO:0032549//ribonucleoside binding;GO:0001882//nucleoside binding;GO:0016874//ligase activity;GO:0097159//organic cyclic compound bindi…	GO:0034641//cellular nitrogen compound metabolic process;GO:2000112//regulation of cellular macromolecule biosynthetic process;GO:0006520//cellular amino acid metabolic process;GO:0043436//oxoacid metabolic process;GO:0044260//cellular macromolecule metabolic process;GO:0050794//regulation of cellular process;GO:0006725//cellular aromatic compound metabolic process;GO:0031323//regulation of cellu…
101251167	114	53	20.94	10.27	-1.02783	1.79e-05	0.000162263	yes	XP_004235956.1	PREDICTED: protein LURP-one-related 5 [Solanum lycopersicum]	-	-	-	-	-	-	-
101251176	376	117	10.73	3.52	-1.608	4.56e-29	3.88e-27	yes	XP_004236885.1	PREDICTED: zinc finger CCCH domain-containing protein 13 [Solanum lycopersicum]	-	-	-	-	GO:0044444//cytoplasmic part;GO:0005737//cytoplasm;GO:0005622//intracellular;GO:0044424//intracellular part;GO:0005623//cell;GO:0044464//cell part	GO:0046872//metal ion binding;GO:0043169//cation binding;GO:0005488//binding;GO:0043167//ion binding	GO:0044262//cellular carbohydrate metabolic process;GO:0006810//transport;GO:0005975//carbohydrate metabolic process;GO:0030243//cellulose metabolic process;GO:0019222//regulation of metabolic process;GO:0050789//regulation of biological process;GO:0016192//vesicle-mediated transport;GO:0065007//biological regulation;GO:0044260//cellular macromolecule metabolic process;GO:0010468//regulation of g…
101251197	36	10	2.46	0.72	-1.77259	0.000250917	0.00175116	yes	XP_004242790.1	PREDICTED: 4-coumarate--CoA ligase 2 [Solanum lycopersicum]	Metabolism	Metabolism of cofactors and vitamins;Amino acid metabolism;Biosynthesis of other secondary metabolites	ko00940//Phenylpropanoid biosynthesis;ko00360//Phenylalanine metabolism;ko00130//Ubiquinone and other terpenoid-quinone biosynthesis	K01904	-	GO:0016874//ligase activity;GO:0016877//ligase activity, forming carbon-sulfur bonds;GO:0016405//CoA-ligase activity;GO:0016491//oxidoreductase activity;GO:0016701//oxidoreductase activity, acting on single donors with incorporation of molecular oxygen;GO:0004497//monooxygenase activity;GO:0003824//catalytic activity;GO:0016703//oxidoreductase activity, acting on single donors with incorporation …	GO:0008152//metabolic process;GO:0044699//single-organism process;GO:0044710//single-organism metabolic process
101251223	927	432	48.84	24.01	-1.02443	3.62e-34	3.84e-32	yes	XP_004229896.2	PREDICTED: ferric reduction oxidase 2 [Solanum lycopersicum]	-	-	-	-	GO:0016020//membrane;GO:0031224//intrinsic component of membrane;GO:0044425//membrane part	GO:0016491//oxidoreductase activity;GO:0003824//catalytic activity	GO:0044710//single-organism metabolic process;GO:0008152//metabolic process;GO:0044699//single-organism process
101251226	16	33	3.26	7.1	1.12295	0.00948508	0.039011	yes	XP_004248124.1	PREDICTED: dirigent protein 22-like [Solanum lycopersicum]	-	-	-	-	-	-	-
101251259	1043	2157	77.5	169.09	1.12552	6e-92	3.17e-89	yes	XP_004234395.1	PREDICTED: oxalate--CoA ligase-like [Solanum lycopersicum]	-	-	-	-	-	GO:0016874//ligase activity;GO:0016877//ligase activity, forming carbon-sulfur bonds;GO:0003824//catalytic activity;GO:0016405//CoA-ligase activity	-
101251277	49	503	3.8	41.16	3.43717	1.51e-98	9.08e-96	yes	XP_004237369.1	PREDICTED: premnaspirodiene oxygenase [Solanum lycopersicum]	Metabolism	Metabolism of terpenoids and polyketides	ko00909//Sesquiterpenoid and triterpenoid biosynthesis	K15472	GO:0016020//membrane;GO:0044425//membrane part;GO:0031224//intrinsic component of membrane	GO:0046914//transition metal ion binding;GO:0043167//ion binding;GO:0046872//metal ion binding;GO:0097159//organic cyclic compound binding;GO:0016491//oxidoreductase activity;GO:0005488//binding;GO:1901363//heterocyclic compound binding;GO:0046906//tetrapyrrole binding;GO:0043169//cation binding;GO:0003824//catalytic activity	GO:0008152//metabolic process;GO:0044710//single-organism metabolic process;GO:0044699//single-organism process
101251297	155	67	16.67	7.6	-1.13318	3.92e-08	5.63e-07	yes	XP_004241572.1	PREDICTED: muscle M-line assembly protein unc-89-like [Solanum tuberosum]	-	-	-	-	-	-	-
101251402	184	32	6.73	1.23	-2.45195	5.74e-25	3.79e-23	yes	XP_004244607.1	PREDICTED: E3 ubiquitin-protein ligase BRE1-like 2 [Solanum lycopersicum]	-	-	-	-	-	-	GO:0019538//protein metabolic process;GO:0010467//gene expression;GO:0043170//macromolecule metabolic process;GO:0044238//primary metabolic process;GO:0071704//organic substance metabolic process;GO:0008152//metabolic process;GO:0030908//protein splicing;GO:0051604//protein maturation;GO:0006508//proteolysis;GO:0016485//protein processing
101251435	64	9	13.05	1.94	-2.74992	1.66e-10	3.28e-09	yes	XP_004232464.1	PREDICTED: lactoylglutathione lyase-like [Solanum lycopersicum]	-	-	-	-	-	GO:0016829//lyase activity;GO:0016846//carbon-sulfur lyase activity;GO:0043167//ion binding;GO:0003824//catalytic activity;GO:0043169//cation binding;GO:0005488//binding	-
101251444	16	33	0.67	1.46	1.12374	0.00948508	0.039011	yes	NP_001307560.1	PREDICTED: glutamate receptor 2.9 [Solanum lycopersicum]	-	-	-	-	GO:0031224//intrinsic component of membrane;GO:0016020//membrane;GO:0044425//membrane part	GO:0022892//substrate-specific transporter activity;GO:0022803//passive transmembrane transporter activity;GO:0022834//ligand-gated channel activity;GO:0005215//transporter activity;GO:0099600//transmembrane receptor activity;GO:0015276//ligand-gated ion channel activity;GO:0022857//transmembrane transporter activity;GO:0015075//ion transmembrane transporter activity;GO:0022838//substrate-specifi…	GO:0051234//establishment of localization;GO:0007154//cell communication;GO:0007165//signal transduction;GO:0044763//single-organism cellular process;GO:0051716//cellular response to stimulus;GO:0051179//localization;GO:0050794//regulation of cellular process;GO:0044699//single-organism process;GO:0007166//cell surface receptor signaling pathway;GO:0006810//transport;GO:1902578//single-organism l…
101251481	24	6	1.6	0.42	-1.92961	0.00233202	0.0121438	yes	XP_004241090.2	PREDICTED: laccase-12-like isoform X1 [Solanum lycopersicum]	-	-	-	-	GO:0005576//extracellular region	GO:0016679//oxidoreductase activity, acting on diphenols and related substances as donors;GO:0016682//oxidoreductase activity, acting on diphenols and related substances as donors, oxygen as acceptor;GO:0046872//metal ion binding;GO:0005488//binding;GO:0016491//oxidoreductase activity;GO:0003824//catalytic activity;GO:0043167//ion binding;GO:0046914//transition metal ion binding;GO:0043169//catio…	GO:1901360//organic cyclic compound metabolic process;GO:0009987//cellular process;GO:0009698//phenylpropanoid metabolic process;GO:0044699//single-organism process;GO:0044237//cellular metabolic process;GO:0008152//metabolic process;GO:0006725//cellular aromatic compound metabolic process;GO:0019748//secondary metabolic process;GO:0071704//organic substance metabolic process;GO:0044710//single-o…
101251495	56	25	3.35	1.58	-1.08424	0.00172494	0.0093962	yes	XP_010324525.2	PREDICTED: B3 domain-containing protein REM10-like [Solanum tuberosum]	-	-	-	-	-	-	GO:0044249//cellular biosynthetic process;GO:1901576//organic substance biosynthetic process;GO:0009059//macromolecule biosynthetic process;GO:0071704//organic substance metabolic process;GO:0034645//cellular macromolecule biosynthetic process;GO:0043170//macromolecule metabolic process;GO:0010467//gene expression;GO:0008152//metabolic process;GO:0044260//cellular macromolecule metabolic process;…
101251501	102	42	7.86	3.42	-1.20053	2.28e-06	2.44e-05	yes	NP_001315360.1	PREDICTED: glycerol-3-phosphate 2-O-acyltransferase 6 [Solanum lycopersicum]	Metabolism	Lipid metabolism	ko00564//Glycerophospholipid metabolism;ko00561//Glycerolipid metabolism	K13508	GO:0044425//membrane part;GO:0031224//intrinsic component of membrane;GO:0016020//membrane	GO:0016747//transferase activity, transferring acyl groups other than amino-acyl groups;GO:0016787//hydrolase activity;GO:0042578//phosphoric ester hydrolase activity;GO:0003824//catalytic activity;GO:0016746//transferase activity, transferring acyl groups;GO:0016740//transferase activity;GO:0016788//hydrolase activity, acting on ester bonds;GO:0008374//O-acyltransferase activity	GO:0044763//single-organism cellular process;GO:0009059//macromolecule biosynthetic process;GO:0043170//macromolecule metabolic process;GO:0048731//system development;GO:0006629//lipid metabolic process;GO:0044699//single-organism process;GO:0000003//reproduction;GO:1901576//organic substance biosynthetic process;GO:0044255//cellular lipid metabolic process;GO:0009791//post-embryonic development;…
101251503	520	1030	62.29	130.19	1.06355	5.09e-42	8.04e-40	yes	XP_004246673.1	PREDICTED: peroxidase 21 [Solanum lycopersicum]	Metabolism	Biosynthesis of other secondary metabolites	ko00940//Phenylpropanoid biosynthesis	K00430	GO:0005622//intracellular;GO:0044444//cytoplasmic part;GO:0044464//cell part;GO:0005737//cytoplasm;GO:0044424//intracellular part;GO:0005623//cell	GO:0016209//antioxidant activity;GO:0043169//cation binding;GO:0046906//tetrapyrrole binding;GO:0043167//ion binding;GO:0005488//binding;GO:1901363//heterocyclic compound binding;GO:0003824//catalytic activity;GO:0097159//organic cyclic compound binding	GO:0009607//response to biotic stimulus;GO:0006950//response to stress;GO:0042743//hydrogen peroxide metabolic process;GO:0043207//response to external biotic stimulus;GO:0050896//response to stimulus;GO:0044237//cellular metabolic process;GO:0009620//response to fungus;GO:0044699//single-organism process;GO:0009605//response to external stimulus;GO:0009987//cellular process;GO:0008152//metabolic…
101251549	17	4	4.35	1.08	-2.00998	0.00722652	0.0315061	yes	XP_004234260.1	CTTNBP2 N-terminal-like protein [Gossypium arboreum]	-	-	-	-	-	-	-
101251551	16	3	3.46	0.68	-2.34717	0.00444281	0.0210029	yes	XP_004251782.1	PREDICTED: E3 ubiquitin ligase BIG BROTHER-related-like [Solanum lycopersicum]	-	-	-	-	-	GO:0005488//binding;GO:0046914//transition metal ion binding;GO:0043169//cation binding;GO:0046872//metal ion binding;GO:0043167//ion binding	-
101251576	52	22	3.99	1.78	-1.16451	0.00154648	0.0085708	yes	XP_004237819.1	PREDICTED: cytochrome P450 71A1-like [Solanum lycopersicum]	-	-	-	-	-	GO:0005488//binding;GO:0097159//organic cyclic compound binding;GO:0046906//tetrapyrrole binding;GO:0046914//transition metal ion binding;GO:0043169//cation binding;GO:0043167//ion binding;GO:0046872//metal ion binding;GO:0016491//oxidoreductase activity;GO:0003824//catalytic activity;GO:1901363//heterocyclic compound binding	GO:0044710//single-organism metabolic process;GO:0044699//single-organism process;GO:0008152//metabolic process
101251596	77	26	5.79	2.06	-1.49092	2.27e-06	2.44e-05	yes	XP_004242709.1	Uveal autoantigen with coiled-coil domains and ankyrin repeats isoform 1 [Theobroma cacao]	-	-	-	-	-	-	-
101251636	652	283	40.75	18.66	-1.12685	8.88e-29	7.45e-27	yes	XP_004249502.1	PREDICTED: interactor of constitutive active ROPs 2, chloroplastic-like [Solanum lycopersicum]	-	-	-	-	-	GO:0005515//protein binding;GO:0005488//binding	-
101251640	101	233	8.84	21.51	1.28289	1.32e-14	4.03e-13	yes	XP_004249996.1	PREDICTED: crocetin glucoside glucosyltransferase-like [Solanum lycopersicum]	Metabolism	Biosynthesis of other secondary metabolites	ko00942//Anthocyanin biosynthesis	K12937	-	GO:0016757//transferase activity, transferring glycosyl groups;GO:0016740//transferase activity;GO:0003824//catalytic activity	-
101251642	139	59	9.24	4.14	-1.15826	1.1e-07	1.47e-06	yes	XP_004232707.1	PREDICTED: ankyrin repeat domain-containing protein 13C [Solanum lycopersicum]	-	-	-	-	-	-	-
101251667	23	6	1.34	0.37	-1.85664	0.00233202	0.0121438	yes	XP_010318690.1	PREDICTED: serine/threonine-protein kinase 4 homolog B isoform X1 [Solanum lycopersicum]	-	-	-	-	-	GO:0016773//phosphotransferase activity, alcohol group as acceptor;GO:0001883//purine nucleoside binding;GO:0016740//transferase activity;GO:0004672//protein kinase activity;GO:0016301//kinase activity;GO:0016772//transferase activity, transferring phosphorus-containing groups;GO:0097367//carbohydrate derivative binding;GO:0032549//ribonucleoside binding;GO:1901363//heterocyclic compound binding;…	GO:0006793//phosphorus metabolic process;GO:0071704//organic substance metabolic process;GO:0019538//protein metabolic process;GO:0009987//cellular process;GO:0043170//macromolecule metabolic process;GO:0044267//cellular protein metabolic process;GO:0043412//macromolecule modification;GO:0006796//phosphate-containing compound metabolic process;GO:0044237//cellular metabolic process;GO:0044238//pr…
101251740	86	198	10.84	26.32	1.27979	1.3e-12	3.28e-11	yes	XP_004232883.1	Pesticidal crystal cry1Ag [Gossypium arboreum]	-	-	-	-	-	-	-
101251748	0	8	0.001	2.49	11.2819	0.00782344	0.0335277	yes	XP_004233630.2	PREDICTED: ethylene-responsive transcription factor RAP2-6-like [Solanum lycopersicum]	-	-	-	-	GO:0043227//membrane-bounded organelle;GO:0005623//cell;GO:0043231//intracellular membrane-bounded organelle;GO:0043229//intracellular organelle;GO:0044464//cell part;GO:0044424//intracellular part;GO:0005622//intracellular;GO:0043226//organelle	GO:0001071//nucleic acid binding transcription factor activity;GO:0003676//nucleic acid binding;GO:0097159//organic cyclic compound binding;GO:0005488//binding;GO:1901363//heterocyclic compound binding	GO:0019222//regulation of metabolic process;GO:0065007//biological regulation;GO:0050789//regulation of biological process;GO:0009987//cellular process;GO:0060255//regulation of macromolecule metabolic process;GO:0009059//macromolecule biosynthetic process;GO:0044237//cellular metabolic process;GO:0009058//biosynthetic process;GO:0044249//cellular biosynthetic process;GO:0034645//cellular macromo…
101251775	119	53	7.32	3.44	-1.08944	3.91e-06	4.02e-05	yes	NP_001296190.1	polygalacturonase non-catalytic subunit AroGP3 precursor [Solanum lycopersicum]	-	-	-	-	GO:0005576//extracellular region;GO:0005623//cell;GO:0030312//external encapsulating structure;GO:0071944//cell periphery;GO:0044464//cell part	-	GO:0009987//cellular process;GO:0032501//multicellular organismal process;GO:0044699//single-organism process;GO:0032502//developmental process;GO:0045229//external encapsulating structure organization;GO:0016043//cellular component organization;GO:0071840//cellular component organization or biogenesis;GO:0044707//single-multicellular organism process;GO:0007275//multicellular organism developmen…
101251778	40	159	9	37.75	2.06848	2.9e-19	1.32e-17	yes	NP_001310244.1	PREDICTED: probable WRKY transcription factor 75 [Solanum lycopersicum]	-	-	-	-	GO:0043231//intracellular membrane-bounded organelle;GO:0043229//intracellular organelle;GO:0005622//intracellular;GO:0043227//membrane-bounded organelle;GO:0044424//intracellular part;GO:0005623//cell;GO:0043226//organelle;GO:0044464//cell part	GO:0003676//nucleic acid binding;GO:1901363//heterocyclic compound binding;GO:0001071//nucleic acid binding transcription factor activity;GO:0005488//binding;GO:0003677//DNA binding;GO:0097159//organic cyclic compound binding	GO:0044237//cellular metabolic process;GO:0048513//animal organ development;GO:0010033//response to organic substance;GO:0048731//system development;GO:0031323//regulation of cellular metabolic process;GO:0044699//single-organism process;GO:0048569//post-embryonic organ development;GO:0048364//root development;GO:2001141//regulation of RNA biosynthetic process;GO:0009267//cellular response to sta…
101251829	396	166	27.68	12.24	-1.17724	1.51e-19	7.03e-18	yes	XP_004249084.1	PREDICTED: laccase-4-like [Solanum lycopersicum]	-	-	-	-	GO:0005576//extracellular region	GO:0043167//ion binding;GO:0016682//oxidoreductase activity, acting on diphenols and related substances as donors, oxygen as acceptor;GO:0046872//metal ion binding;GO:0016491//oxidoreductase activity;GO:0003824//catalytic activity;GO:0046914//transition metal ion binding;GO:0005488//binding;GO:0043169//cation binding;GO:0016679//oxidoreductase activity, acting on diphenols and related substances …	GO:0044710//single-organism metabolic process;GO:0019748//secondary metabolic process;GO:0044763//single-organism cellular process;GO:0009987//cellular process;GO:1901360//organic cyclic compound metabolic process;GO:0006725//cellular aromatic compound metabolic process;GO:0071704//organic substance metabolic process;GO:0008152//metabolic process;GO:0044237//cellular metabolic process;GO:0044699/…
101251833	36	118	2.34	8.08	1.78785	3.27e-12	7.9e-11	yes	XP_004231891.1	PREDICTED: probable indole-3-acetic acid-amido synthetase GH3.1 [Solanum lycopersicum]	Environmental Information Processing	Signal transduction	ko04075//Plant hormone signal transduction	K14487	-	GO:0003824//catalytic activity	GO:0009719//response to endogenous stimulus;GO:0009725//response to hormone;GO:0014070//response to organic cyclic compound;GO:0050896//response to stimulus;GO:0010033//response to organic substance;GO:0042221//response to chemical
101251834	21	7	4.15	1.45	-1.51706	0.0126012	0.0492883	yes	XP_019071726.1	PREDICTED: ycf20-like protein isoform X1 [Solanum lycopersicum]	-	-	-	-	-	-	-
101251962	191	86	20.66	9.81	-1.07452	4.62e-09	7.55e-08	yes	XP_004235632.1	PREDICTED: GDSL esterase/lipase APG-like [Solanum lycopersicum]	-	-	-	-	GO:0005576//extracellular region	GO:0016635//oxidoreductase activity, acting on the CH-CH group of donors, quinone or related compound as acceptor;GO:0016787//hydrolase activity;GO:0016627//oxidoreductase activity, acting on the CH-CH group of donors;GO:0016491//oxidoreductase activity;GO:0003824//catalytic activity	GO:0071840//cellular component organization or biogenesis;GO:0048588//developmental cell growth;GO:0005975//carbohydrate metabolic process;GO:0044238//primary metabolic process;GO:0009411//response to UV;GO:0042546//cell wall biogenesis;GO:0051234//establishment of localization;GO:0051179//localization;GO:0009914//hormone transport;GO:0032787//monocarboxylic acid metabolic process;GO:0090066//reg…
101251980	4	28	0.34	2.53	2.89553	1.11e-05	0.000104996	yes	XP_010320891.1	PREDICTED: protein O-linked-mannose beta-1,4-N-acetylglucosaminyltransferase 2-like [Citrus sinensis]	-	-	-	-	-	GO:0003824//catalytic activity;GO:0016740//transferase activity	-
101251996	547	1145	81.91	179.14	1.12898	8.09e-52	1.67e-49	yes	XP_004241916.1	PREDICTED: RING-H2 finger protein ATL7 isoform X1 [Solanum lycopersicum]	-	-	-	-	-	GO:0043167//ion binding;GO:0046872//metal ion binding;GO:0043169//cation binding;GO:0046914//transition metal ion binding;GO:0005488//binding	-
101252066	78	34	5.99	2.75	-1.12312	0.000130039	0.000979226	yes	XP_004235547.1	PREDICTED: cytochrome P450 71A1-like [Solanum lycopersicum]	-	-	-	-	-	GO:0016491//oxidoreductase activity;GO:0043169//cation binding;GO:0005488//binding;GO:0046906//tetrapyrrole binding;GO:0046914//transition metal ion binding;GO:0097159//organic cyclic compound binding;GO:0043167//ion binding;GO:1901363//heterocyclic compound binding;GO:0003824//catalytic activity;GO:0046872//metal ion binding	GO:0008152//metabolic process;GO:0044699//single-organism process;GO:0044710//single-organism metabolic process
101252071	8.41	0	1.61	0.001	-10.6528	0.00782344	0.0335277	yes	XP_004253468.2	PREDICTED: phosphate transporter PHO1-like, partial [Solanum lycopersicum]	-	-	-	-	GO:0044422//organelle part;GO:0031224//intrinsic component of membrane;GO:0043227//membrane-bounded organelle;GO:0044425//membrane part;GO:0044446//intracellular organelle part;GO:0043231//intracellular membrane-bounded organelle;GO:0044464//cell part;GO:0031984//organelle subcompartment;GO:0044424//intracellular part;GO:0043226//organelle;GO:0005623//cell;GO:0043229//intracellular organelle;GO:0…	GO:0015075//ion transmembrane transporter activity;GO:0022857//transmembrane transporter activity;GO:0005215//transporter activity;GO:0022892//substrate-specific transporter activity;GO:0015103//inorganic anion transmembrane transporter activity;GO:0022891//substrate-specific transmembrane transporter activity;GO:0008509//anion transmembrane transporter activity	GO:0019748//secondary metabolic process;GO:0009698//phenylpropanoid metabolic process;GO:0044765//single-organism transport;GO:0071704//organic substance metabolic process;GO:0044699//single-organism process;GO:0006950//response to stress;GO:0015698//inorganic anion transport;GO:0006812//cation transport;GO:0009991//response to extracellular stimulus;GO:0033554//cellular response to stress;GO:000…
101252081	20	54	3.99	11.38	1.51204	3.49e-05	0.000298193	yes	XP_004239003.1	PREDICTED: basic leucine zipper 43 [Solanum lycopersicum]	-	-	-	-	-	GO:0001071//nucleic acid binding transcription factor activity;GO:0097159//organic cyclic compound binding;GO:0003676//nucleic acid binding;GO:0003677//DNA binding;GO:1901363//heterocyclic compound binding;GO:0005488//binding	GO:0010468//regulation of gene expression;GO:0065007//biological regulation;GO:0060255//regulation of macromolecule metabolic process;GO:0050789//regulation of biological process;GO:0019222//regulation of metabolic process
101252150	13	1	0.61	0.05	-3.60881	0.00183717	0.00990781	yes	XP_004234262.1	PREDICTED: G-type lectin S-receptor-like serine/threonine-protein kinase SD1-29 [Solanum lycopersicum]	-	-	-	-	-	GO:0016301//kinase activity;GO:0097159//organic cyclic compound binding;GO:0016740//transferase activity;GO:0016772//transferase activity, transferring phosphorus-containing groups;GO:0004672//protein kinase activity;GO:0016773//phosphotransferase activity, alcohol group as acceptor;GO:1901363//heterocyclic compound binding;GO:0036094//small molecule binding;GO:0003824//catalytic activity;GO:0005…	GO:0044237//cellular metabolic process;GO:0008152//metabolic process;GO:0006796//phosphate-containing compound metabolic process;GO:0009987//cellular process;GO:0006793//phosphorus metabolic process
101252173	107	38	14.72	5.52	-1.41504	3.94e-08	5.64e-07	yes	XP_004237699.1	PREDICTED: probable caffeoyl-CoA O-methyltransferase At4g26220 isoform X1 [Solanum lycopersicum]	Metabolism	Amino acid metabolism;Biosynthesis of other secondary metabolites	ko00940//Phenylpropanoid biosynthesis;ko00360//Phenylalanine metabolism;ko00941//Flavonoid biosynthesis;ko00945//Stilbenoid, diarylheptanoid and gingerol biosynthesis	K00588	-	GO:0008171//O-methyltransferase activity;GO:0003824//catalytic activity;GO:0016740//transferase activity;GO:0008168//methyltransferase activity;GO:0016741//transferase activity, transferring one-carbon groups	GO:0008152//metabolic process
101252186	16	4	4.21	1.11	-1.92326	0.0118586	0.0467902	yes	XP_004240357.1	PREDICTED: histone H2B.7-like [Solanum lycopersicum]	-	-	-	-	-	-	-
101252233	23	2	2.73	0.25	-3.4489	1.96e-05	0.000176787	yes	XP_010327421.1	PREDICTED: probable aquaporin TIP1-2 isoform X2 [Solanum lycopersicum]	-	-	-	-	GO:0044425//membrane part;GO:0031224//intrinsic component of membrane;GO:0016020//membrane	-	GO:0051234//establishment of localization;GO:0051179//localization
101252281	13	1	2.41	0.2	-3.59096	0.00183717	0.00990781	yes	XP_004238836.1	PREDICTED: homeobox-leucine zipper protein HOX3 [Solanum lycopersicum]	-	-	-	-	GO:0005623//cell;GO:0044464//cell part;GO:0043229//intracellular organelle;GO:0043227//membrane-bounded organelle;GO:0005622//intracellular;GO:0043231//intracellular membrane-bounded organelle;GO:0044424//intracellular part;GO:0043226//organelle	GO:0003676//nucleic acid binding;GO:1901363//heterocyclic compound binding;GO:0097159//organic cyclic compound binding;GO:0003677//DNA binding;GO:0005488//binding;GO:0001071//nucleic acid binding transcription factor activity	GO:0009987//cellular process;GO:0044260//cellular macromolecule metabolic process;GO:0009059//macromolecule biosynthetic process;GO:0009058//biosynthetic process;GO:0050789//regulation of biological process;GO:0044237//cellular metabolic process;GO:0034645//cellular macromolecule biosynthetic process;GO:0010468//regulation of gene expression;GO:0044249//cellular biosynthetic process;GO:0019222//r…
101252337	682	213	76.96	25.36	-1.60155	1.28e-50	2.5e-48	yes	XP_004249003.1	PREDICTED: protein EXORDIUM-like 5 [Solanum lycopersicum]	-	-	-	-	-	-	-
101252344	2614	1226	188.82	93.44	-1.0149	8.36e-86	3.93e-83	yes	XP_004232058.1	PREDICTED: L-ascorbate oxidase homolog [Solanum lycopersicum]	-	-	-	-	GO:0044464//cell part;GO:0005623//cell;GO:0071944//cell periphery;GO:0005618//cell wall;GO:0030312//external encapsulating structure	GO:0016682//oxidoreductase activity, acting on diphenols and related substances as donors, oxygen as acceptor;GO:0016491//oxidoreductase activity;GO:0005488//binding;GO:0016679//oxidoreductase activity, acting on diphenols and related substances as donors;GO:0043169//cation binding;GO:0003824//catalytic activity;GO:0046914//transition metal ion binding;GO:0046872//metal ion binding;GO:0043167//io…	GO:0008152//metabolic process;GO:0044699//single-organism process;GO:0044710//single-organism metabolic process
101252348	22	7	4.08	1.37	-1.57439	0.00817489	0.034609	yes	XP_004250252.1	PREDICTED: transcription initiation factor TFIID subunit 11-like [Solanum lycopersicum]	-	-	-	-	-	-	-
101252395	11	35	0.5	1.63	1.70487	0.000351377	0.00234201	yes	XP_004239582.1	PREDICTED: respiratory burst oxidase homolog protein E-like [Solanum lycopersicum]	Organismal Systems	Environmental adaptation	ko04626//Plant-pathogen interaction	K13447	GO:0016020//membrane;GO:0044425//membrane part;GO:0031224//intrinsic component of membrane	GO:0003824//catalytic activity;GO:0016491//oxidoreductase activity;GO:0043169//cation binding;GO:0046872//metal ion binding;GO:0005488//binding;GO:0043167//ion binding;GO:0016651//oxidoreductase activity, acting on NAD(P)H;GO:0016209//antioxidant activity	GO:0044710//single-organism metabolic process;GO:0044699//single-organism process;GO:0008152//metabolic process
101252414	97	39	10.73	4.55	-1.23771	2.67e-06	2.82e-05	yes	XP_004244306.1	PREDICTED: receptor-like serine/threonine-protein kinase At1g78530 [Solanum lycopersicum]	-	-	-	-	GO:0031224//intrinsic component of membrane;GO:0044425//membrane part;GO:0016020//membrane	GO:0003824//catalytic activity;GO:0001882//nucleoside binding;GO:0016772//transferase activity, transferring phosphorus-containing groups;GO:0001883//purine nucleoside binding;GO:0016773//phosphotransferase activity, alcohol group as acceptor;GO:0097367//carbohydrate derivative binding;GO:0005488//binding;GO:0016301//kinase activity;GO:1901363//heterocyclic compound binding;GO:0032550//purine rib…	GO:0006796//phosphate-containing compound metabolic process;GO:0009987//cellular process;GO:0036211//protein modification process;GO:0006464//cellular protein modification process;GO:0008152//metabolic process;GO:0019538//protein metabolic process;GO:0006793//phosphorus metabolic process;GO:0044238//primary metabolic process;GO:0044267//cellular protein metabolic process;GO:0043412//macromolecule…
101252431	62	24	6.11	2.5	-1.28924	0.000134677	0.00101029	yes	XP_004229582.1	PREDICTED: F-box/kelch-repeat protein SKIP25-like [Solanum lycopersicum]	-	-	-	-	-	-	-
101252434	724	330	15.15	7.28	-1.05731	1.1e-28	9.14e-27	yes	XP_004247588.3	PREDICTED: LOW QUALITY PROTEIN: golgin subfamily B member 1 [Solanum lycopersicum]	-	-	-	-	-	-	-
101252461	4	60	0.48	7.63	3.99058	4.24e-14	1.22e-12	yes	XP_004233980.2	PREDICTED: BURP domain-containing protein 5-like [Solanum lycopersicum]	-	-	-	-	-	-	-
101252465	7	33	1.5	7.45	2.31228	2.58e-05	0.000226304	yes	XP_004234399.1	PAR-1c [Nicotiana tabacum]	-	-	-	-	-	-	-
101252496	44	10	6.49	1.56	-2.05667	5.7e-06	5.69e-05	yes	XP_004241410.1	PREDICTED: tetrapyrrole-binding protein, chloroplastic [Solanum lycopersicum]	-	-	-	-	GO:0031090//organelle membrane;GO:0044464//cell part;GO:0009526//plastid envelope;GO:0044422//organelle part;GO:0031975//envelope;GO:0031967//organelle envelope;GO:0043226//organelle;GO:0044435//plastid part;GO:0044446//intracellular organelle part;GO:0009536//plastid;GO:0016020//membrane;GO:0044424//intracellular part;GO:0043229//intracellular organelle;GO:0044444//cytoplasmic part;GO:0005623//c…	GO:0005488//binding;GO:0097159//organic cyclic compound binding;GO:0005515//protein binding	GO:0044699//single-organism process;GO:0051171//regulation of nitrogen compound metabolic process;GO:0006721//terpenoid metabolic process;GO:0009117//nucleotide metabolic process;GO:0022607//cellular component assembly;GO:0006520//cellular amino acid metabolic process;GO:0016053//organic acid biosynthetic process;GO:0016070//RNA metabolic process;GO:0032501//multicellular organismal process;GO:00…
101252504	165	29	13.16	2.44	-2.43121	2.03e-22	1.15e-20	yes	XP_004243379.1	PREDICTED: GATA zinc finger domain-containing protein 14-like [Solanum lycopersicum]	-	-	-	-	-	-	-
101252507	112	49	7.04	3.25	-1.11514	5.73e-06	5.71e-05	yes	XP_004244134.1	PREDICTED: protein KRI1 homolog [Solanum lycopersicum]	-	-	-	-	GO:0005623//cell;GO:0005737//cytoplasm;GO:0044464//cell part;GO:0044444//cytoplasmic part;GO:0044424//intracellular part;GO:0005622//intracellular	-	-
101252553	149	39	39.73	10.97	-1.85667	6.74e-15	2.12e-13	yes	XP_004233476.1	PREDICTED: probable calcium-binding protein CML18 [Solanum lycopersicum]	Organismal Systems	Environmental adaptation	ko04626//Plant-pathogen interaction	K13448	-	GO:0046872//metal ion binding;GO:0005488//binding;GO:0043169//cation binding;GO:0043167//ion binding	-
101252571	46	327	9.68	72.61	2.90709	4.92e-56	1.2e-53	yes	XP_004235961.1	PREDICTED: cucumber peeling cupredoxin-like [Solanum lycopersicum]	-	-	-	-	-	-	-
101252574	22	64	3.54	10.86	1.6172	2.26e-06	2.43e-05	yes	XP_004253515.1	PREDICTED: probable acetyltransferase NATA1-like [Solanum lycopersicum]	-	-	-	-	-	GO:0016747//transferase activity, transferring acyl groups other than amino-acyl groups;GO:0016407//acetyltransferase activity;GO:0016740//transferase activity;GO:0016746//transferase activity, transferring acyl groups;GO:0003824//catalytic activity	-
101252649	134	49	12.3	4.75	-1.37266	3.11e-09	5.22e-08	yes	XP_004232624.1	PREDICTED: xylosyltransferase 1-like [Solanum lycopersicum]	-	-	-	-	-	GO:0003824//catalytic activity;GO:0016757//transferase activity, transferring glycosyl groups;GO:0016740//transferase activity;GO:0008194//UDP-glycosyltransferase activity	-
101252653	105	35	11.52	4.05	-1.50815	1.27e-08	1.95e-07	yes	XP_004233222.1	PREDICTED: cathepsin B-like [Solanum lycopersicum]	-	-	-	-	-	GO:0016787//hydrolase activity;GO:0070011//peptidase activity, acting on L-amino acid peptides;GO:0003824//catalytic activity;GO:0004175//endopeptidase activity;GO:0008233//peptidase activity	GO:0065007//biological regulation;GO:0071704//organic substance metabolic process;GO:0019538//protein metabolic process;GO:0050789//regulation of biological process;GO:0043170//macromolecule metabolic process;GO:0044238//primary metabolic process;GO:0008152//metabolic process;GO:0019222//regulation of metabolic process
101252722	89	35	16.99	7.05	-1.26899	5.17e-06	5.19e-05	yes	XP_004247817.1	BnaAnng08000D [Brassica napus]	-	-	-	-	-	-	-
101252738	324	120	20.95	8.19	-1.35501	3.62e-20	1.77e-18	yes	XP_004232550.1	PREDICTED: probable acyl-activating enzyme 1, peroxisomal [Solanum lycopersicum]	-	-	-	-	-	GO:0003824//catalytic activity	GO:0044763//single-organism cellular process;GO:0006720//isoprenoid metabolic process;GO:0044255//cellular lipid metabolic process;GO:0043436//oxoacid metabolic process;GO:0006629//lipid metabolic process;GO:0009987//cellular process;GO:0070887//cellular response to chemical stimulus;GO:0071495//cellular response to endogenous stimulus;GO:0044237//cellular metabolic process;GO:0071370//cellular r…
101252742	44	19	3.45	1.57	-1.13583	0.00522183	0.0241096	yes	XP_010317076.1	PREDICTED: flocculation protein FLO11-like isoform X1 [Nicotiana sylvestris]	-	-	-	-	-	-	-
101252795	139	358	13.91	37.8	1.44226	2.38e-25	1.62e-23	yes	XP_004244529.1	PREDICTED: patatin-08-like [Solanum lycopersicum]	-	-	-	-	GO:0043227//membrane-bounded organelle;GO:0043229//intracellular organelle;GO:0005622//intracellular;GO:0044424//intracellular part;GO:0005623//cell;GO:0044464//cell part;GO:0043231//intracellular membrane-bounded organelle;GO:0043226//organelle	GO:0003824//catalytic activity	GO:0071704//organic substance metabolic process;GO:0050896//response to stimulus;GO:0044710//single-organism metabolic process;GO:0044699//single-organism process;GO:0044238//primary metabolic process;GO:0008152//metabolic process;GO:0006629//lipid metabolic process;GO:0006950//response to stress
101252838	94	292	6.26	20.5	1.71139	1.16e-26	8.53e-25	yes	XP_004232796.1	PREDICTED: external alternative NAD(P)H-ubiquinone oxidoreductase B2, mitochondrial [Solanum lycopersicum]	-	-	-	-	-	GO:1901363//heterocyclic compound binding;GO:0046872//metal ion binding;GO:0005488//binding;GO:0003824//catalytic activity;GO:0043169//cation binding;GO:0043167//ion binding;GO:1901265//nucleoside phosphate binding;GO:0036094//small molecule binding;GO:0097159//organic cyclic compound binding;GO:0000166//nucleotide binding	GO:0044699//single-organism process;GO:0008152//metabolic process;GO:0044710//single-organism metabolic process
101252854	13	2	3.62	0.59	-2.6172	0.0074061	0.0321401	yes	XP_019068517.1	PREDICTED: thioredoxin H4-1 [Solanum lycopersicum]	-	-	-	-	-	GO:0016491//oxidoreductase activity;GO:0003824//catalytic activity;GO:0015036//disulfide oxidoreductase activity;GO:0016667//oxidoreductase activity, acting on a sulfur group of donors	GO:0044710//single-organism metabolic process;GO:0044699//single-organism process;GO:0008152//metabolic process;GO:0065008//regulation of biological quality;GO:0071704//organic substance metabolic process;GO:0065007//biological regulation;GO:0044763//single-organism cellular process;GO:0042592//homeostatic process;GO:0009987//cellular process;GO:0019725//cellular homeostasis;GO:0044281//small mol…
101252875	41	5	3.22	0.41	-2.97336	8.12e-08	1.11e-06	yes	XP_004238923.1	PREDICTED: 3-ketoacyl-CoA synthase 6-like [Solanum lycopersicum]	Metabolism	Lipid metabolism	ko00062//Fatty acid elongation	K15397	GO:0005623//cell;GO:0043229//intracellular organelle;GO:0043227//membrane-bounded organelle;GO:0043231//intracellular membrane-bounded organelle;GO:0044464//cell part;GO:0044424//intracellular part;GO:0043226//organelle;GO:0005622//intracellular	GO:0003824//catalytic activity;GO:0016746//transferase activity, transferring acyl groups;GO:0016740//transferase activity	GO:0007275//multicellular organism development;GO:0006950//response to stress;GO:0009607//response to biotic stimulus;GO:0044767//single-organism developmental process;GO:0006629//lipid metabolic process;GO:0060560//developmental growth involved in morphogenesis;GO:0016049//cell growth;GO:0009314//response to radiation;GO:0051707//response to other organism;GO:0061024//membrane organization;GO:00…
101252891	120	49	7.82	3.4	-1.20163	4.24e-07	5.14e-06	yes	XP_004241493.1	PREDICTED: MORC family CW-type zinc finger protein 3-like isoform X1 [Solanum lycopersicum]	-	-	-	-	-	-	GO:0090304//nucleic acid metabolic process;GO:0034641//cellular nitrogen compound metabolic process;GO:0071704//organic substance metabolic process;GO:0009987//cellular process;GO:0044763//single-organism cellular process;GO:0032501//multicellular organismal process;GO:0009892//negative regulation of metabolic process;GO:0046483//heterocycle metabolic process;GO:0006807//nitrogen compound metabol…
101252980	24	8	3.85	1.35	-1.5119	0.0107331	0.0431997	yes	XP_004237702.1	PREDICTED: protein STAY-GREEN LIKE, chloroplastic [Solanum lycopersicum]	-	-	-	-	-	-	GO:0009987//cellular process;GO:0006996//organelle organization;GO:0071840//cellular component organization or biogenesis;GO:0016043//cellular component organization;GO:0009657//plastid organization
101252987	18	5	0.92	0.27	-1.76867	0.0106654	0.0429993	yes	XP_004239498.2	PREDICTED: muscle M-line assembly protein unc-89 [Vitis vinifera]	-	-	-	-	-	-	-
101253047	206	78	36.46	14.56	-1.3243	8.81e-13	2.26e-11	yes	XP_010312777.1	PREDICTED: ethylene-responsive transcription factor ERF014 [Solanum lycopersicum]	-	-	-	-	GO:0044464//cell part;GO:0043231//intracellular membrane-bounded organelle;GO:0043227//membrane-bounded organelle;GO:0005622//intracellular;GO:0043229//intracellular organelle;GO:0005623//cell;GO:0044424//intracellular part;GO:0043226//organelle	GO:0001071//nucleic acid binding transcription factor activity;GO:0005488//binding;GO:1901363//heterocyclic compound binding;GO:0003676//nucleic acid binding;GO:0097159//organic cyclic compound binding	GO:0043170//macromolecule metabolic process;GO:0071704//organic substance metabolic process;GO:0044237//cellular metabolic process;GO:0010468//regulation of gene expression;GO:1901576//organic substance biosynthetic process;GO:0009987//cellular process;GO:0044260//cellular macromolecule metabolic process;GO:0065007//biological regulation;GO:0044249//cellular biosynthetic process;GO:0009058//biosy…
101253069	183	352	10.57	21.45	1.021	4.93e-15	1.56e-13	yes	XP_010318581.1	PREDICTED: boron transporter 4 [Solanum lycopersicum]	-	-	-	-	GO:0044425//membrane part;GO:0031224//intrinsic component of membrane;GO:0016020//membrane	GO:0022857//transmembrane transporter activity;GO:0022804//active transmembrane transporter activity;GO:0022892//substrate-specific transporter activity;GO:0015291//secondary active transmembrane transporter activity;GO:0099516//ion antiporter activity;GO:0015297//antiporter activity;GO:0008509//anion transmembrane transporter activity;GO:0015301//anion:anion antiporter activity;GO:0005215//trans…	GO:0006820//anion transport;GO:0044765//single-organism transport;GO:1902578//single-organism localization;GO:0051179//localization;GO:0044699//single-organism process;GO:0006811//ion transport;GO:0006810//transport;GO:0051234//establishment of localization
101253074	10	1	0.7	0.07	-3.32193	0.0117402	0.0464502	yes	XP_019068675.1	Os06g0179500 [Oryza sativa Japonica Group]	-	-	-	-	GO:0016020//membrane;GO:0044425//membrane part;GO:0031224//intrinsic component of membrane	-	-
101253076	45	21	3.38	1.67	-1.01718	0.00932491	0.0384839	yes	XP_004237177.1	UDP-N-acetylmuramoyl-tripeptide--D-alanyl-D-alanine ligase [Morus notabilis]	-	-	-	-	GO:0005622//intracellular;GO:0044464//cell part;GO:0005623//cell;GO:0044424//intracellular part	GO:0036094//small molecule binding;GO:0001882//nucleoside binding;GO:0097367//carbohydrate derivative binding;GO:0032549//ribonucleoside binding;GO:0097159//organic cyclic compound binding;GO:0016879//ligase activity, forming carbon-nitrogen bonds;GO:0003824//catalytic activity;GO:1901363//heterocyclic compound binding;GO:0005488//binding;GO:0001883//purine nucleoside binding;GO:0016881//acid-ami…	GO:0050793//regulation of developmental process;GO:0050794//regulation of cellular process;GO:0022604//regulation of cell morphogenesis;GO:0022603//regulation of anatomical structure morphogenesis;GO:0050789//regulation of biological process;GO:0051128//regulation of cellular component organization;GO:0065007//biological regulation;GO:0008152//metabolic process
101253079	54	11	7.27	1.56	-2.22041	2.9e-07	3.6e-06	yes	XP_004237375.1	AT1G65230-like protein, partial [Solanum lycopersicum]	-	-	-	-	GO:0005737//cytoplasm;GO:0043229//intracellular organelle;GO:0005623//cell;GO:0009536//plastid;GO:0005622//intracellular;GO:0043227//membrane-bounded organelle;GO:0044464//cell part;GO:0044424//intracellular part;GO:0044444//cytoplasmic part;GO:0043231//intracellular membrane-bounded organelle;GO:0043226//organelle	-	GO:0019748//secondary metabolic process;GO:0051186//cofactor metabolic process;GO:0016108//tetraterpenoid metabolic process;GO:0061024//membrane organization;GO:0006090//pyruvate metabolic process;GO:0071704//organic substance metabolic process;GO:0006629//lipid metabolic process;GO:0055086//nucleobase-containing small molecule metabolic process;GO:0006732//coenzyme metabolic process;GO:0009987//…
101253092	25	49	2.35	4.86	1.0483	0.00343053	0.0169351	yes	XP_004240858.1	PREDICTED: glycerol-3-phosphate dehydrogenase [NAD(+)] 2, chloroplastic [Solanum lycopersicum]	Metabolism	Lipid metabolism	ko00564//Glycerophospholipid metabolism	K00006	GO:0005737//cytoplasm;GO:0044424//intracellular part;GO:0043229//intracellular organelle;GO:0031967//organelle envelope;GO:0043231//intracellular membrane-bounded organelle;GO:0044444//cytoplasmic part;GO:0044446//intracellular organelle part;GO:0044422//organelle part;GO:0005623//cell;GO:0031975//envelope;GO:0044435//plastid part;GO:0005622//intracellular;GO:0044464//cell part;GO:0009526//plasti…	GO:0016616//oxidoreductase activity, acting on the CH-OH group of donors, NAD or NADP as acceptor;GO:0048037//cofactor binding;GO:0003824//catalytic activity;GO:0016614//oxidoreductase activity, acting on CH-OH group of donors;GO:0005488//binding;GO:0036094//small molecule binding;GO:0016491//oxidoreductase activity;GO:1901265//nucleoside phosphate binding;GO:0097159//organic cyclic compound bind…	GO:0050896//response to stimulus;GO:0006793//phosphorus metabolic process;GO:0044699//single-organism process;GO:0044710//single-organism metabolic process;GO:0008152//metabolic process;GO:0009607//response to biotic stimulus;GO:0098542//defense response to other organism;GO:0003006//developmental process involved in reproduction;GO:0006796//phosphate-containing compound metabolic process;GO:0002…
101253094	32	11	3.28	1.19	-1.46273	0.002916	0.0147139	yes	XP_004241412.1	PREDICTED: chloroplast stem-loop binding protein of 41 kDa b, chloroplastic [Solanum lycopersicum]	-	-	-	-	GO:0005622//intracellular;GO:0005911//cell-cell junction;GO:0005576//extracellular region;GO:1990904//ribonucleoprotein complex;GO:0043231//intracellular membrane-bounded organelle;GO:0044435//plastid part;GO:0044422//organelle part;GO:0044434//chloroplast part;GO:0009526//plastid envelope;GO:0044464//cell part;GO:0005623//cell;GO:0031967//organelle envelope;GO:0009536//plastid;GO:0043229//intrac…	GO:0030246//carbohydrate binding;GO:0005488//binding;GO:0001871//pattern binding;GO:0097159//organic cyclic compound binding;GO:0003723//RNA binding;GO:0030247//polysaccharide binding;GO:0003676//nucleic acid binding;GO:1901363//heterocyclic compound binding	GO:0006633//fatty acid biosynthetic process;GO:0071822//protein complex subunit organization;GO:0032501//multicellular organismal process;GO:0071840//cellular component organization or biogenesis;GO:0010468//regulation of gene expression;GO:1901701//cellular response to oxygen-containing compound;GO:0032268//regulation of cellular protein metabolic process;GO:0014070//response to organic cyclic c…
101253107	1990	874	143.48	66.49	-1.10964	1.85e-79	7.85e-77	yes	NP_001311008.1	PREDICTED: protein IQ-DOMAIN 14 [Solanum lycopersicum]	-	-	-	-	-	-	-
101253199	22	6	1.11	0.32	-1.79442	0.00374236	0.0182234	yes	XP_010322539.1	PREDICTED: copper amine oxidase 1-like [Solanum lycopersicum]	Metabolism	Amino acid metabolism;Metabolism of other amino acids;Biosynthesis of other secondary metabolites	ko00260//Glycine, serine and threonine metabolism;ko00360//Phenylalanine metabolism;ko00350//Tyrosine metabolism;ko00410//beta-Alanine metabolism;ko00960//Tropane, piperidine and pyridine alkaloid biosynthesis;ko00950//Isoquinoline alkaloid biosynthesis	K00276	GO:0043229//intracellular organelle;GO:0044444//cytoplasmic part;GO:0043231//intracellular membrane-bounded organelle;GO:0044424//intracellular part;GO:0043226//organelle;GO:0005622//intracellular;GO:0042579//microbody;GO:0005623//cell;GO:0005737//cytoplasm;GO:0043227//membrane-bounded organelle;GO:0044464//cell part	GO:0048037//cofactor binding;GO:0016491//oxidoreductase activity;GO:0046914//transition metal ion binding;GO:0005488//binding;GO:0016641//oxidoreductase activity, acting on the CH-NH2 group of donors, oxygen as acceptor;GO:0003824//catalytic activity;GO:0016638//oxidoreductase activity, acting on the CH-NH2 group of donors;GO:0046872//metal ion binding;GO:0043169//cation binding;GO:0043167//ion b…	GO:0071704//organic substance metabolic process;GO:0044710//single-organism metabolic process;GO:1901564//organonitrogen compound metabolic process;GO:0008152//metabolic process;GO:0006807//nitrogen compound metabolic process;GO:0044699//single-organism process
101253228	51	11	4.49	1.02	-2.13815	1.26e-06	1.41e-05	yes	XP_004230071.1	PREDICTED: protein RESTRICTED TEV MOVEMENT 2 [Solanum lycopersicum]	-	-	-	-	-	-	GO:0006950//response to stress;GO:0050896//response to stimulus
101253309	40	18	4.83	2.28	-1.08299	0.0120502	0.0474941	yes	XP_004246161.1	PREDICTED: probable iron/ascorbate oxidoreductase DDB_G0283291 isoform X1 [Solanum lycopersicum]	-	-	-	-	-	GO:0016491//oxidoreductase activity;GO:0005488//binding;GO:0043167//ion binding;GO:0003824//catalytic activity;GO:0046872//metal ion binding;GO:0043169//cation binding	-
101253311	1511	580	104.68	42.39	-1.30419	4.12e-77	1.59e-74	yes	XP_004246339.1	PREDICTED: laccase-4 [Solanum lycopersicum]	-	-	-	-	GO:0005576//extracellular region	GO:0016491//oxidoreductase activity;GO:0016679//oxidoreductase activity, acting on diphenols and related substances as donors;GO:0043169//cation binding;GO:0016682//oxidoreductase activity, acting on diphenols and related substances as donors, oxygen as acceptor;GO:0003824//catalytic activity;GO:0046872//metal ion binding;GO:0046914//transition metal ion binding;GO:0005488//binding;GO:0043167//io…	GO:0008152//metabolic process;GO:0071704//organic substance metabolic process;GO:0019748//secondary metabolic process;GO:0009698//phenylpropanoid metabolic process;GO:0006725//cellular aromatic compound metabolic process;GO:0009987//cellular process;GO:0044763//single-organism cellular process;GO:0044699//single-organism process;GO:0009808//lignin metabolic process;GO:1901360//organic cyclic comp…
101253342	38	9	3.91	0.98	-1.99631	4.13e-05	0.000348194	yes	XP_004232711.1	PREDICTED: ATP synthase gamma chain, chloroplastic [Solanum lycopersicum]	Metabolism	Energy metabolism	ko00190//Oxidative phosphorylation;ko00195//Photosynthesis	K02115	GO:0031984//organelle subcompartment;GO:0043226//organelle;GO:0016020//membrane;GO:0031975//envelope;GO:0032991//macromolecular complex;GO:0009526//plastid envelope;GO:0044435//plastid part;GO:0043234//protein complex;GO:0005623//cell;GO:0044422//organelle part;GO:0009507//chloroplast;GO:0033178//proton-transporting two-sector ATPase complex, catalytic domain;GO:0005737//cytoplasm;GO:0043227//mem…	GO:0016462//pyrophosphatase activity;GO:0022892//substrate-specific transporter activity;GO:0016818//hydrolase activity, acting on acid anhydrides, in phosphorus-containing anhydrides;GO:0016787//hydrolase activity;GO:0016820//hydrolase activity, acting on acid anhydrides, catalyzing transmembrane movement of substances;GO:0022804//active transmembrane transporter activity;GO:0042623//ATPase acti…	GO:0048869//cellular developmental process;GO:0009205//purine ribonucleoside triphosphate metabolic process;GO:0009199//ribonucleoside triphosphate metabolic process;GO:0034622//cellular macromolecular complex assembly;GO:0006793//phosphorus metabolic process;GO:0034654//nucleobase-containing compound biosynthetic process;GO:0009124//nucleoside monophosphate biosynthetic process;GO:0009694//jasmo…
101253380	25	2	3.94	0.33	-3.57766	1.06e-05	0.000100873	yes	XP_004239673.1	PREDICTED: chlorophyll a-b binding protein 6A, chloroplastic [Solanum lycopersicum]	Metabolism	Energy metabolism	ko00196//Photosynthesis - antenna proteins	K08907	GO:0009526//plastid envelope;GO:0005737//cytoplasm;GO:0098796//membrane protein complex;GO:0043231//intracellular membrane-bounded organelle;GO:0043226//organelle;GO:0044435//plastid part;GO:0009521//photosystem;GO:0044446//intracellular organelle part;GO:0031967//organelle envelope;GO:0031976//plastid thylakoid;GO:0043234//protein complex;GO:0009536//plastid;GO:0044444//cytoplasmic part;GO:00095…	GO:0043167//ion binding;GO:1901363//heterocyclic compound binding;GO:0005488//binding;GO:0043169//cation binding;GO:0046906//tetrapyrrole binding;GO:0097159//organic cyclic compound binding	GO:0006139//nucleobase-containing compound metabolic process;GO:0034641//cellular nitrogen compound metabolic process;GO:1901700//response to oxygen-containing compound;GO:0008152//metabolic process;GO:0019684//photosynthesis, light reaction;GO:0009987//cellular process;GO:0042221//response to chemical;GO:0044237//cellular metabolic process;GO:0006464//cellular protein modification process;GO:000…
101253421	47	17	1.81	0.69	-1.39132	0.000629585	0.00392778	yes	XP_004247307.1	PREDICTED: multiple C2 and transmembrane domain-containing protein 1 [Nicotiana tomentosiformis]	-	-	-	-	GO:0016020//membrane;GO:0044425//membrane part;GO:0031224//intrinsic component of membrane	-	-
101253430	42	10	4.74	1.19	-1.99393	1.51e-05	0.000139206	yes	XP_004248132.2	PREDICTED: GDSL esterase/lipase At5g45960-like [Solanum lycopersicum]	-	-	-	-	-	GO:0016787//hydrolase activity;GO:0003824//catalytic activity	GO:0044710//single-organism metabolic process;GO:0006629//lipid metabolic process;GO:0071704//organic substance metabolic process;GO:0044238//primary metabolic process;GO:0044699//single-organism process;GO:0008152//metabolic process
101253467	188	85	28.59	13.64	-1.06767	7.41e-09	1.17e-07	yes	XP_004235637.1	PREDICTED: acid phosphatase 1-like [Solanum lycopersicum]	-	-	-	-	-	GO:0042578//phosphoric ester hydrolase activity;GO:0016788//hydrolase activity, acting on ester bonds;GO:0016791//phosphatase activity;GO:0003824//catalytic activity;GO:0016787//hydrolase activity	GO:0006796//phosphate-containing compound metabolic process;GO:0044237//cellular metabolic process;GO:0008152//metabolic process;GO:0006793//phosphorus metabolic process;GO:0009987//cellular process
101253483	34	9	8.22	2.3	-1.8375	0.000275406	0.00189337	yes	XP_004238925.1	BnaC02g43410D [Brassica napus]	-	-	-	-	GO:0044446//intracellular organelle part;GO:0043229//intracellular organelle;GO:0044422//organelle part;GO:0044424//intracellular part;GO:0005623//cell;GO:0005622//intracellular;GO:0009536//plastid;GO:0043231//intracellular membrane-bounded organelle;GO:0043226//organelle;GO:0043227//membrane-bounded organelle;GO:0005737//cytoplasm;GO:0044444//cytoplasmic part;GO:0009507//chloroplast;GO:0044434//…	-	GO:0032501//multicellular organismal process;GO:0060255//regulation of macromolecule metabolic process;GO:0010556//regulation of macromolecule biosynthetic process;GO:0009653//anatomical structure morphogenesis;GO:0048731//system development;GO:0019219//regulation of nucleobase-containing compound metabolic process;GO:0009889//regulation of biosynthetic process;GO:0048513//animal organ developmen…
101253502	6	24	0.97	4.09	2.07604	0.000885647	0.00529334	yes	XP_004242508.1	glutaredoxin (GRX) family protein [Medicago truncatula]	-	-	-	-	-	GO:0016667//oxidoreductase activity, acting on a sulfur group of donors;GO:0016491//oxidoreductase activity;GO:0015036//disulfide oxidoreductase activity;GO:0003824//catalytic activity	GO:0019725//cellular homeostasis;GO:0008152//metabolic process;GO:0042592//homeostatic process;GO:0009987//cellular process;GO:0065007//biological regulation;GO:0065008//regulation of biological quality;GO:0044763//single-organism cellular process;GO:0044699//single-organism process;GO:0044710//single-organism metabolic process
101253503	30	11	2.53	0.98	-1.36828	0.00647851	0.0287665	yes	XP_004243011.1	PREDICTED: vinorine synthase-like [Solanum lycopersicum]	Metabolism	Biosynthesis of other secondary metabolites	ko00940//Phenylpropanoid biosynthesis;ko00941//Flavonoid biosynthesis;ko00945//Stilbenoid, diarylheptanoid and gingerol biosynthesis	K13065	-	GO:0003824//catalytic activity;GO:0016746//transferase activity, transferring acyl groups;GO:0016740//transferase activity	-
101253541	18	3	1.71	0.3	-2.51096	0.00149764	0.00834506	yes	XP_004231523.1	PREDICTED: glyceraldehyde-3-phosphate dehydrogenase A, chloroplastic-like [Solanum lycopersicum]	Metabolism	Global and Overview;Energy metabolism	ko01200//Carbon metabolism;ko00710//Carbon fixation in photosynthetic organisms	K05298	GO:0044444//cytoplasmic part;GO:0005737//cytoplasm;GO:0005623//cell;GO:0043227//membrane-bounded organelle;GO:0043229//intracellular organelle;GO:0043231//intracellular membrane-bounded organelle;GO:0009536//plastid;GO:0044464//cell part;GO:0005622//intracellular;GO:0044424//intracellular part;GO:0043226//organelle	GO:0097159//organic cyclic compound binding;GO:1901363//heterocyclic compound binding;GO:0016620//oxidoreductase activity, acting on the aldehyde or oxo group of donors, NAD or NADP as acceptor;GO:0005488//binding;GO:0036094//small molecule binding;GO:0016903//oxidoreductase activity, acting on the aldehyde or oxo group of donors;GO:0003824//catalytic activity;GO:0016491//oxidoreductase activity;…	GO:0005975//carbohydrate metabolic process;GO:0044699//single-organism process;GO:0008152//metabolic process;GO:0019318//hexose metabolic process;GO:0044238//primary metabolic process;GO:0044281//small molecule metabolic process;GO:0071704//organic substance metabolic process;GO:0044723//single-organism carbohydrate metabolic process;GO:0015977//carbon fixation;GO:0044710//single-organism metabol…
101253545	17	43	2.23	5.95	1.41585	0.000401804	0.00264151	yes	XP_004249508.1	PREDICTED: protein REVEILLE 8-like [Solanum lycopersicum]	-	-	-	-	-	GO:0097159//organic cyclic compound binding;GO:0003676//nucleic acid binding;GO:0005488//binding;GO:1901363//heterocyclic compound binding	-
101253557	386	989	7.79	21.05	1.43413	1.85e-64	5.96e-62	yes	XP_010316866.2	PREDICTED: probable LRR receptor-like serine/threonine-protein kinase At1g07650 [Solanum lycopersicum]	-	-	-	-	-	GO:0003824//catalytic activity;GO:0004672//protein kinase activity;GO:0016740//transferase activity;GO:0016773//phosphotransferase activity, alcohol group as acceptor;GO:0016772//transferase activity, transferring phosphorus-containing groups;GO:0016301//kinase activity	-
101253591	197	65	7.71	2.69	-1.51912	7.15e-15	2.24e-13	yes	XP_004240011.1	PREDICTED: structural maintenance of chromosomes protein 6B isoform X1 [Solanum lycopersicum]	-	-	-	-	GO:0043226//organelle;GO:0043232//intracellular non-membrane-bounded organelle;GO:0005623//cell;GO:0044464//cell part;GO:0043229//intracellular organelle;GO:0043228//non-membrane-bounded organelle;GO:0032991//macromolecular complex;GO:0005622//intracellular;GO:0044424//intracellular part;GO:0043234//protein complex	GO:0097367//carbohydrate derivative binding;GO:0097159//organic cyclic compound binding;GO:1901363//heterocyclic compound binding;GO:0032549//ribonucleoside binding;GO:0001883//purine nucleoside binding;GO:0036094//small molecule binding;GO:0005488//binding;GO:0032550//purine ribonucleoside binding;GO:0001882//nucleoside binding	GO:0034641//cellular nitrogen compound metabolic process;GO:0044699//single-organism process;GO:0006281//DNA repair;GO:0090304//nucleic acid metabolic process;GO:0006950//response to stress;GO:0006139//nucleobase-containing compound metabolic process;GO:0006310//DNA recombination;GO:0008152//metabolic process;GO:0006725//cellular aromatic compound metabolic process;GO:0000725//recombinational rep…
101253619	61.65	21.68	7.69	2.85	-1.43202	6.18e-05	0.00050083	yes	XP_019071070.1	PREDICTED: laccase-17-like [Solanum lycopersicum]	-	-	-	-	-	-	-
101253628	242	85	34.39	12.74	-1.43262	1.07e-16	4.02e-15	yes	NP_001332771.1	PREDICTED: chlorophyll a-b binding protein 8, chloroplastic-like [Solanum lycopersicum]	Metabolism	Energy metabolism	ko00196//Photosynthesis - antenna proteins	K08909	GO:0098796//membrane protein complex;GO:0009536//plastid;GO:0009507//chloroplast;GO:0043227//membrane-bounded organelle;GO:0016020//membrane;GO:0034357//photosynthetic membrane;GO:0043229//intracellular organelle;GO:0044422//organelle part;GO:0043226//organelle;GO:0005623//cell;GO:0044435//plastid part;GO:0043234//protein complex;GO:0031984//organelle subcompartment;GO:0031224//intrinsic componen…	GO:0097159//organic cyclic compound binding;GO:0005488//binding;GO:1901363//heterocyclic compound binding;GO:0043167//ion binding;GO:0043169//cation binding;GO:0046906//tetrapyrrole binding	GO:0019752//carboxylic acid metabolic process;GO:0009058//biosynthetic process;GO:0006807//nitrogen compound metabolic process;GO:0044267//cellular protein metabolic process;GO:0006082//organic acid metabolic process;GO:0036211//protein modification process;GO:0006520//cellular amino acid metabolic process;GO:0044281//small molecule metabolic process;GO:0006091//generation of precursor metabolite…
101253642	85	23	10.81	3.09	-1.80669	9.35e-09	1.46e-07	yes	XP_004231897.1	PREDICTED: probable membrane-associated kinase regulator 1 [Solanum lycopersicum]	-	-	-	-	-	-	-
101253643	16.03	3	0.91	0.18	-2.33787	0.00444281	0.0210029	yes	XP_019071540.1	PREDICTED: subtilisin-like protease [Solanum lycopersicum]	-	-	-	-	-	GO:0016787//hydrolase activity;GO:0004175//endopeptidase activity;GO:0003824//catalytic activity;GO:0008233//peptidase activity;GO:0070011//peptidase activity, acting on L-amino acid peptides	GO:0043170//macromolecule metabolic process;GO:0019538//protein metabolic process;GO:0044238//primary metabolic process;GO:0008152//metabolic process;GO:0071704//organic substance metabolic process
101253644	35	12	2.57	0.93	-1.46647	0.00166131	0.00909307	yes	XP_004250002.1	PREDICTED: glucomannan 4-beta-mannosyltransferase 9-like [Solanum lycopersicum]	-	-	-	-	-	GO:0016758//transferase activity, transferring hexosyl groups;GO:0016757//transferase activity, transferring glycosyl groups;GO:0003824//catalytic activity;GO:0019187//beta-1,4-mannosyltransferase activity;GO:0016740//transferase activity;GO:0000030//mannosyltransferase activity	GO:0044710//single-organism metabolic process;GO:0070085//glycosylation;GO:0071704//organic substance metabolic process;GO:0044238//primary metabolic process;GO:0005975//carbohydrate metabolic process;GO:0044699//single-organism process;GO:0044723//single-organism carbohydrate metabolic process;GO:0008152//metabolic process
101253701	36	388	2.78	31.56	3.50494	9.51e-79	3.96e-76	yes	XP_004243471.1	PREDICTED: premnaspirodiene oxygenase-like [Solanum lycopersicum]	-	-	-	-	-	GO:0043167//ion binding;GO:0016491//oxidoreductase activity;GO:0043169//cation binding;GO:0046914//transition metal ion binding;GO:0046906//tetrapyrrole binding;GO:0046872//metal ion binding;GO:0005488//binding;GO:1901363//heterocyclic compound binding;GO:0003824//catalytic activity;GO:0097159//organic cyclic compound binding	GO:0044699//single-organism process;GO:0044710//single-organism metabolic process;GO:0008152//metabolic process
101253705	13	1	1.97	0.16	-3.62205	0.00183717	0.00990781	yes	XP_004244224.1	PREDICTED: expansin-A12 [Solanum lycopersicum]	-	-	-	-	GO:0071944//cell periphery;GO:0044464//cell part;GO:0030312//external encapsulating structure;GO:0005623//cell	-	GO:0071555//cell wall organization;GO:0045229//external encapsulating structure organization;GO:0071554//cell wall organization or biogenesis;GO:0016043//cellular component organization;GO:0071840//cellular component organization or biogenesis;GO:0009987//cellular process
101253711	355	143	24.16	10.27	-1.23418	4.78e-19	2.15e-17	yes	XP_004246425.1	PREDICTED: laccase-17-like [Solanum lycopersicum]	-	-	-	-	GO:0005576//extracellular region	GO:0016491//oxidoreductase activity;GO:0046914//transition metal ion binding;GO:0003824//catalytic activity;GO:0046872//metal ion binding;GO:0016682//oxidoreductase activity, acting on diphenols and related substances as donors, oxygen as acceptor;GO:0005488//binding;GO:0043169//cation binding;GO:0016679//oxidoreductase activity, acting on diphenols and related substances as donors;GO:0043167//io…	GO:0008152//metabolic process;GO:0009808//lignin metabolic process;GO:0044763//single-organism cellular process;GO:1901360//organic cyclic compound metabolic process;GO:0044710//single-organism metabolic process;GO:0044237//cellular metabolic process;GO:0009987//cellular process;GO:0006725//cellular aromatic compound metabolic process;GO:0019748//secondary metabolic process;GO:0044699//single-org…
101253788	287	655	38.14	91.83	1.26766	1.2e-36	1.5e-34	yes	XP_004240090.1	PREDICTED: acidic endochitinase [Solanum lycopersicum]	Metabolism	Carbohydrate metabolism	ko00520//Amino sugar and nucleotide sugar metabolism	K01183	GO:0071944//cell periphery;GO:0030312//external encapsulating structure;GO:0005623//cell;GO:0044421//extracellular region part;GO:0005576//extracellular region;GO:0044464//cell part	GO:0004553//hydrolase activity, hydrolyzing O-glycosyl compounds;GO:0016798//hydrolase activity, acting on glycosyl bonds;GO:0016787//hydrolase activity;GO:0003824//catalytic activity	GO:0044238//primary metabolic process;GO:1901135//carbohydrate derivative metabolic process;GO:0072593//reactive oxygen species metabolic process;GO:0071704//organic substance metabolic process;GO:0044237//cellular metabolic process;GO:0008152//metabolic process;GO:0044260//cellular macromolecule metabolic process;GO:0005975//carbohydrate metabolic process;GO:0018205//peptidyl-lysine modification…
101253847	24	8	4.54	1.6	-1.50462	0.0107331	0.0431997	yes	XP_004249681.1	PLATZ transcription factor family protein [Theobroma cacao]	-	-	-	-	-	-	-
101253856	2755	1105	415.75	175.93	-1.24071	2.53e-126	2.49e-123	yes	XP_004232891.1	PREDICTED: pistil-specific extensin-like protein [Solanum lycopersicum]	-	-	-	-	-	GO:0005198//structural molecule activity	-
101253864	235	834	18.9	70.78	1.90496	2.95e-82	1.3e-79	yes	XP_004251871.1	PREDICTED: UDP-glucose flavonoid 3-O-glucosyltransferase 6-like [Solanum lycopersicum]	-	-	-	-	-	GO:0016758//transferase activity, transferring hexosyl groups;GO:0016757//transferase activity, transferring glycosyl groups;GO:0016740//transferase activity;GO:0003824//catalytic activity	-
101253875	141	47	14.41	5.07	-1.50701	6.48e-11	1.35e-09	yes	XP_010314598.1	PREDICTED: branched-chain-amino-acid aminotransferase 2, chloroplastic-like [Solanum lycopersicum]	Metabolism	Metabolism of cofactors and vitamins;Amino acid metabolism;Global and Overview	ko01230//Biosynthesis of amino acids;ko00270//Cysteine and methionine metabolism;ko01210//2-Oxocarboxylic acid metabolism;ko00280//Valine, leucine and isoleucine degradation;ko00770//Pantothenate and CoA biosynthesis;ko00290//Valine, leucine and isoleucine biosynthesis	K00826	-	GO:0016769//transferase activity, transferring nitrogenous groups;GO:0003824//catalytic activity;GO:0004084//branched-chain-amino-acid transaminase activity;GO:0008483//transaminase activity;GO:0016740//transferase activity	GO:1901564//organonitrogen compound metabolic process;GO:0009987//cellular process;GO:0006520//cellular amino acid metabolic process;GO:0044281//small molecule metabolic process;GO:0044710//single-organism metabolic process;GO:0071704//organic substance metabolic process;GO:0043436//oxoacid metabolic process;GO:0008152//metabolic process;GO:0019752//carboxylic acid metabolic process;GO:0044237//c…
101253894	140	52	17.36	6.8	-1.35216	1.97e-09	3.42e-08	yes	XP_004238674.1	PREDICTED: probable xyloglucan endotransglucosylase/hydrolase protein 33 [Solanum lycopersicum]	-	-	-	-	GO:0005576//extracellular region;GO:0016020//membrane;GO:0071944//cell periphery;GO:0044464//cell part;GO:0044425//membrane part;GO:0005623//cell;GO:0016021//integral component of membrane;GO:0030312//external encapsulating structure;GO:0031224//intrinsic component of membrane	GO:0016740//transferase activity;GO:0003824//catalytic activity;GO:0016798//hydrolase activity, acting on glycosyl bonds;GO:0016787//hydrolase activity;GO:0016758//transferase activity, transferring hexosyl groups;GO:0016757//transferase activity, transferring glycosyl groups	GO:0042545//cell wall modification;GO:0045229//external encapsulating structure organization;GO:0009664//plant-type cell wall organization;GO:0005975//carbohydrate metabolic process;GO:0071669//plant-type cell wall organization or biogenesis;GO:0071840//cellular component organization or biogenesis;GO:0009987//cellular process;GO:0016043//cellular component organization;GO:0071704//organic substa…
101253900	722	290	87.03	36.88	-1.23867	1.17e-36	1.48e-34	yes	NP_001316336.1	PREDICTED: 2-hydroxyisoflavanone dehydratase-like [Solanum lycopersicum]	-	-	-	-	-	GO:0003824//catalytic activity	-
101253916	97	33	13.88	4.98	-1.47879	8.05e-08	1.11e-06	yes	XP_004243384.1	PREDICTED: NAC domain-containing protein 8 [Solanum lycopersicum]	-	-	-	-	GO:0043227//membrane-bounded organelle;GO:0044424//intracellular part;GO:0044464//cell part;GO:0043226//organelle;GO:0005623//cell;GO:0043231//intracellular membrane-bounded organelle;GO:0005622//intracellular;GO:0043229//intracellular organelle	GO:1901363//heterocyclic compound binding;GO:0097159//organic cyclic compound binding;GO:0005488//binding;GO:0003676//nucleic acid binding;GO:0001071//nucleic acid binding transcription factor activity	GO:0065007//biological regulation;GO:0009889//regulation of biosynthetic process;GO:2001141//regulation of RNA biosynthetic process;GO:0019222//regulation of metabolic process;GO:0010556//regulation of macromolecule biosynthetic process;GO:0050794//regulation of cellular process;GO:0080090//regulation of primary metabolic process;GO:0051252//regulation of RNA metabolic process;GO:0031326//regulat…
101253936	152	60	12.65	5.27	-1.26326	2.3e-09	3.95e-08	yes	XP_004247593.1	PREDICTED: protein IQ-DOMAIN 14 [Solanum lycopersicum]	-	-	-	-	-	-	-
101253940	568	1139	62.83	132.92	1.08103	3.85e-47	6.78e-45	yes	XP_019071682.1	PREDICTED: bifunctional L-3-cyanoalanine synthase/cysteine synthase 1, mitochondrial [Solanum lycopersicum]	Metabolism	Amino acid metabolism;Global and Overview;Energy metabolism;Metabolism of other amino acids	ko01200//Carbon metabolism;ko01230//Biosynthesis of amino acids;ko00270//Cysteine and methionine metabolism;ko00460//Cyanoamino acid metabolism;ko00920//Sulfur metabolism	K13034	GO:0043227//membrane-bounded organelle;GO:0005623//cell;GO:0044464//cell part;GO:0043231//intracellular membrane-bounded organelle;GO:0044424//intracellular part;GO:0043229//intracellular organelle;GO:0005622//intracellular;GO:0043226//organelle	GO:0016846//carbon-sulfur lyase activity;GO:0016829//lyase activity;GO:0003824//catalytic activity;GO:0016835//carbon-oxygen lyase activity	GO:0044281//small molecule metabolic process;GO:1901566//organonitrogen compound biosynthetic process;GO:0044272//sulfur compound biosynthetic process;GO:0006807//nitrogen compound metabolic process;GO:1901576//organic substance biosynthetic process;GO:0008152//metabolic process;GO:0044249//cellular biosynthetic process;GO:0009987//cellular process;GO:0046394//carboxylic acid biosynthetic process…
101253979	7	39	0.85	4.98	2.55061	1.1e-06	1.25e-05	yes	XP_010317814.1	PREDICTED: calcium uniporter protein, mitochondrial-like [Solanum tuberosum]	-	-	-	-	-	-	-
101253989	44	96	2.93	6.74	1.20185	4.48e-06	4.56e-05	yes	XP_004253518.2	PREDICTED: phenylalanine ammonia-lyase-like, partial [Solanum lycopersicum]	Metabolism	Amino acid metabolism;Biosynthesis of other secondary metabolites	ko00940//Phenylpropanoid biosynthesis;ko00360//Phenylalanine metabolism	K10775	GO:0005622//intracellular;GO:0044464//cell part;GO:0005623//cell;GO:0044424//intracellular part	GO:0003824//catalytic activity;GO:0016829//lyase activity;GO:0016840//carbon-nitrogen lyase activity;GO:0016841//ammonia-lyase activity	GO:0019752//carboxylic acid metabolic process;GO:0043436//oxoacid metabolic process;GO:0044249//cellular biosynthetic process;GO:0044710//single-organism metabolic process;GO:0044550//secondary metabolite biosynthetic process;GO:0006082//organic acid metabolic process;GO:0009072//aromatic amino acid family metabolic process;GO:0009058//biosynthetic process;GO:0044238//primary metabolic process;GO…
101254058	5	25	0.39	2.04	2.38702	0.00019426	0.00139648	yes	XP_004233564.1	PREDICTED: premnaspirodiene oxygenase-like [Solanum lycopersicum]	-	-	-	-	-	GO:0097159//organic cyclic compound binding;GO:0003824//catalytic activity;GO:1901363//heterocyclic compound binding;GO:0043167//ion binding;GO:0046914//transition metal ion binding;GO:0046872//metal ion binding;GO:0046906//tetrapyrrole binding;GO:0043169//cation binding;GO:0005488//binding;GO:0016491//oxidoreductase activity	GO:0008152//metabolic process;GO:0044710//single-organism metabolic process;GO:0044699//single-organism process
101254151	10	0	0.78	0.001	-9.60733	0.00195752	0.0104578	yes	XP_004232064.1	PREDICTED: geraniol 8-hydroxylase-like [Solanum lycopersicum]	-	-	-	-	GO:0016020//membrane;GO:0005622//intracellular;GO:0044424//intracellular part;GO:0031090//organelle membrane;GO:0044464//cell part;GO:0005623//cell;GO:0043227//membrane-bounded organelle;GO:0044422//organelle part;GO:0043226//organelle;GO:0043229//intracellular organelle;GO:0031224//intrinsic component of membrane;GO:0044425//membrane part;GO:0043231//intracellular membrane-bounded organelle	GO:0046914//transition metal ion binding;GO:0046872//metal ion binding;GO:0097159//organic cyclic compound binding;GO:0043169//cation binding;GO:0046906//tetrapyrrole binding;GO:0004497//monooxygenase activity;GO:1901363//heterocyclic compound binding;GO:0005488//binding;GO:0016491//oxidoreductase activity;GO:0043167//ion binding;GO:0003824//catalytic activity	GO:0044763//single-organism cellular process;GO:0006720//isoprenoid metabolic process;GO:0044255//cellular lipid metabolic process;GO:0044237//cellular metabolic process;GO:0044710//single-organism metabolic process;GO:0006721//terpenoid metabolic process;GO:0071704//organic substance metabolic process;GO:0044238//primary metabolic process;GO:0044699//single-organism process;GO:0009987//cellular …
101254230	324	127	34	14.06	-1.27394	2.86e-18	1.19e-16	yes	XP_004246682.1	PREDICTED: probable beta-1,4-xylosyltransferase IRX9 [Solanum lycopersicum]	-	-	-	-	GO:0044422//organelle part;GO:0005623//cell;GO:0044425//membrane part;GO:0031090//organelle membrane;GO:0043227//membrane-bounded organelle;GO:0043229//intracellular organelle;GO:0044424//intracellular part;GO:0016020//membrane;GO:0031224//intrinsic component of membrane;GO:0043226//organelle;GO:0043231//intracellular membrane-bounded organelle;GO:0044464//cell part;GO:0005622//intracellular	GO:0015020//glucuronosyltransferase activity;GO:0016758//transferase activity, transferring hexosyl groups;GO:0003824//catalytic activity;GO:0016763//transferase activity, transferring pentosyl groups;GO:0016740//transferase activity;GO:0008194//UDP-glycosyltransferase activity;GO:0016757//transferase activity, transferring glycosyl groups	GO:0045491//xylan metabolic process;GO:0009987//cellular process;GO:0010410//hemicellulose metabolic process;GO:0043170//macromolecule metabolic process;GO:0044260//cellular macromolecule metabolic process;GO:0071704//organic substance metabolic process;GO:0044237//cellular metabolic process;GO:0044085//cellular component biogenesis;GO:0005975//carbohydrate metabolic process;GO:0071669//plant-typ…
101254231	142.35	36.32	17.69	4.76	-1.8939	1.28e-14	3.91e-13	yes	XP_004246869.2	PREDICTED: laccase-17-like [Solanum lycopersicum]	-	-	-	-	GO:0005576//extracellular region	GO:0016682//oxidoreductase activity, acting on diphenols and related substances as donors, oxygen as acceptor;GO:0003824//catalytic activity;GO:0005488//binding;GO:0046872//metal ion binding;GO:0046914//transition metal ion binding;GO:0043169//cation binding;GO:0016491//oxidoreductase activity;GO:0016679//oxidoreductase activity, acting on diphenols and related substances as donors;GO:0043167//io…	GO:0044711//single-organism biosynthetic process;GO:1901360//organic cyclic compound metabolic process;GO:0009808//lignin metabolic process;GO:0009058//biosynthetic process;GO:0009699//phenylpropanoid biosynthetic process;GO:0044237//cellular metabolic process;GO:0044249//cellular biosynthetic process;GO:0044238//primary metabolic process;GO:0019438//aromatic compound biosynthetic process;GO:1901…
101254267	68	22	12.03	4.11	-1.54943	3.98e-06	4.08e-05	yes	XP_004250956.1	ATP synthase subunit epsilon [Morus notabilis]	-	-	-	-	-	-	-
101254285	38	12	1.9	0.63	-1.59258	0.000477073	0.0030848	yes	XP_010314603.1	PREDICTED: plectin-like [Solanum tuberosum]	-	-	-	-	-	-	-
101254319	560	245	27.63	12.76	-1.11461	8.59e-25	5.52e-23	yes	XP_004244763.1	PREDICTED: copper amine oxidase 1-like [Solanum lycopersicum]	Metabolism	Amino acid metabolism;Metabolism of other amino acids;Biosynthesis of other secondary metabolites	ko00260//Glycine, serine and threonine metabolism;ko00360//Phenylalanine metabolism;ko00350//Tyrosine metabolism;ko00410//beta-Alanine metabolism;ko00960//Tropane, piperidine and pyridine alkaloid biosynthesis;ko00950//Isoquinoline alkaloid biosynthesis	K00276	GO:0042579//microbody;GO:0005737//cytoplasm;GO:0043231//intracellular membrane-bounded organelle;GO:0044444//cytoplasmic part;GO:0005623//cell;GO:0005622//intracellular;GO:0044424//intracellular part;GO:0043226//organelle;GO:0043229//intracellular organelle;GO:0044464//cell part;GO:0043227//membrane-bounded organelle	GO:0043169//cation binding;GO:0048037//cofactor binding;GO:0016641//oxidoreductase activity, acting on the CH-NH2 group of donors, oxygen as acceptor;GO:0046914//transition metal ion binding;GO:0016638//oxidoreductase activity, acting on the CH-NH2 group of donors;GO:0016491//oxidoreductase activity;GO:0043167//ion binding;GO:0005488//binding;GO:0046872//metal ion binding;GO:0003824//catalytic ac…	GO:0006807//nitrogen compound metabolic process;GO:0044699//single-organism process;GO:0008152//metabolic process;GO:0044710//single-organism metabolic process;GO:1901564//organonitrogen compound metabolic process;GO:0071704//organic substance metabolic process
101254322	51	15	2.66	0.82	-1.69773	3.42e-05	0.000293788	yes	XP_019070935.1	PREDICTED: subtilisin-like protease [Solanum lycopersicum]	-	-	-	-	-	GO:0004175//endopeptidase activity;GO:0070011//peptidase activity, acting on L-amino acid peptides;GO:0016787//hydrolase activity;GO:0008233//peptidase activity;GO:0003824//catalytic activity	GO:0043170//macromolecule metabolic process;GO:0008152//metabolic process;GO:0071704//organic substance metabolic process;GO:0019538//protein metabolic process;GO:0044238//primary metabolic process
101254349	23	5	4.15	0.95	-2.12711	0.00091941	0.00547246	yes	XP_004249511.1	PREDICTED: myb-like protein X-like [Solanum tuberosum]	-	-	-	-	-	-	-
101254361	8	0	1.44	0.001	-10.4919	0.00782344	0.0335277	yes	XP_004234098.1	PREDICTED: ras-related protein RABA1f-like [Solanum lycopersicum]	Cellular Processes	Transport and catabolism	ko04144//Endocytosis	K07904	GO:0005623//cell;GO:0044464//cell part	GO:0001882//nucleoside binding;GO:0016787//hydrolase activity;GO:1901363//heterocyclic compound binding;GO:0097367//carbohydrate derivative binding;GO:0097159//organic cyclic compound binding;GO:0001883//purine nucleoside binding;GO:0036094//small molecule binding;GO:0017111//nucleoside-triphosphatase activity;GO:0003824//catalytic activity;GO:0016462//pyrophosphatase activity;GO:0016817//hydrola…	GO:0007154//cell communication;GO:0033036//macromolecule localization;GO:0035556//intracellular signal transduction;GO:0009987//cellular process;GO:0007165//signal transduction;GO:0050896//response to stimulus;GO:0071702//organic substance transport;GO:0015031//protein transport;GO:0044763//single-organism cellular process;GO:0044700//single organism signaling;GO:0046907//intracellular transport;…
101254367	2	13	0.36	2.45	2.76671	0.0074061	0.0321401	yes	XP_004252633.1	PREDICTED: dnaJ homolog subfamily C member 17-like [Solanum lycopersicum]	-	-	-	-	-	GO:0036094//small molecule binding;GO:0097159//organic cyclic compound binding;GO:0005488//binding	-
101254378	13	36	1.07	3.13	1.54855	0.000949698	0.00561414	yes	XP_004237706.1	PREDICTED: 2-oxoisovalerate dehydrogenase subunit alpha 1, mitochondrial isoform X1 [Solanum lycopersicum]	Metabolism	Amino acid metabolism;Carbohydrate metabolism	ko00280//Valine, leucine and isoleucine degradation;ko00640//Propanoate metabolism	K00166	-	GO:0016491//oxidoreductase activity;GO:0016903//oxidoreductase activity, acting on the aldehyde or oxo group of donors;GO:0003824//catalytic activity	GO:0008152//metabolic process;GO:0044699//single-organism process;GO:0044710//single-organism metabolic process
101254409	24	3	1.93	0.26	-2.89202	4.98e-05	0.000411492	yes	XP_004244985.2	PREDICTED: probable glycosyltransferase At5g25310 [Solanum lycopersicum]	-	-	-	-	GO:0043229//intracellular organelle;GO:0044425//membrane part;GO:0031090//organelle membrane;GO:0043231//intracellular membrane-bounded organelle;GO:0043227//membrane-bounded organelle;GO:0044422//organelle part;GO:0005623//cell;GO:0005622//intracellular;GO:0031224//intrinsic component of membrane;GO:0044424//intracellular part;GO:0044464//cell part;GO:0043226//organelle;GO:0016020//membrane	GO:0003824//catalytic activity;GO:0016740//transferase activity;GO:0016757//transferase activity, transferring glycosyl groups	-
101254439	57	19	4.28	1.5	-1.51265	4.51e-05	0.000376448	yes	XP_004231981.1	PREDICTED: serine hydroxymethyltransferase, mitochondrial [Solanum lycopersicum]	Metabolism	Metabolism of cofactors and vitamins;Amino acid metabolism;Global and Overview;Carbohydrate metabolism;Metabolism of other amino acids	ko01200//Carbon metabolism;ko01230//Biosynthesis of amino acids;ko00630//Glyoxylate and dicarboxylate metabolism;ko00260//Glycine, serine and threonine metabolism;ko00460//Cyanoamino acid metabolism;ko00670//One carbon pool by folate	K00600	GO:0044464//cell part;GO:0005623//cell;GO:0005622//intracellular;GO:0043229//intracellular organelle;GO:0043231//intracellular membrane-bounded organelle;GO:0043227//membrane-bounded organelle;GO:0044424//intracellular part;GO:0043226//organelle	GO:0043167//ion binding;GO:0016740//transferase activity;GO:0016742//hydroxymethyl-, formyl- and related transferase activity;GO:0016741//transferase activity, transferring one-carbon groups;GO:0003824//catalytic activity;GO:0005488//binding;GO:0043168//anion binding	GO:0009069//serine family amino acid metabolic process;GO:0019752//carboxylic acid metabolic process;GO:0008152//metabolic process;GO:0071704//organic substance metabolic process;GO:0044699//single-organism process;GO:0044238//primary metabolic process;GO:0006730//one-carbon metabolic process;GO:0044710//single-organism metabolic process;GO:0044237//cellular metabolic process;GO:0006807//nitrogen…
101254449	33	10	7.06	2.26	-1.64335	0.00095196	0.0056229	yes	XP_004233482.1	PREDICTED: probable histone chaperone ASF1A [Solanum lycopersicum]	-	-	-	-	GO:0043227//membrane-bounded organelle;GO:0043231//intracellular membrane-bounded organelle;GO:0044424//intracellular part;GO:0005623//cell;GO:0043226//organelle;GO:0044464//cell part;GO:0043229//intracellular organelle;GO:0005622//intracellular	-	GO:0009987//cellular process;GO:0071840//cellular component organization or biogenesis;GO:0051276//chromosome organization;GO:0016043//cellular component organization;GO:0006996//organelle organization;GO:0006325//chromatin organization;GO:0043933//macromolecular complex subunit organization
101254471	1079	495	103.98	50.33	-1.04682	1.97e-40	2.86e-38	yes	XP_004236303.1	PREDICTED: probable pectate lyase 18 [Solanum lycopersicum]	Metabolism	Carbohydrate metabolism	ko00040//Pentose and glucuronate interconversions	K01728	-	GO:0016835//carbon-oxygen lyase activity;GO:0016837//carbon-oxygen lyase activity, acting on polysaccharides;GO:0043167//ion binding;GO:0043169//cation binding;GO:0003824//catalytic activity;GO:0016829//lyase activity;GO:0005488//binding	GO:1901575//organic substance catabolic process;GO:0016052//carbohydrate catabolic process;GO:0071704//organic substance metabolic process;GO:0044238//primary metabolic process;GO:0005976//polysaccharide metabolic process;GO:0008152//metabolic process;GO:0000272//polysaccharide catabolic process;GO:0009057//macromolecule catabolic process;GO:0043170//macromolecule metabolic process;GO:0009056//ca…
101254483	3	14	1.77	8.71	2.29892	0.0127622	0.0497476	yes	XP_004238414.1	PREDICTED: NADH dehydrogenase [ubiquinone] 1 beta subcomplex subunit 2 [Solanum lycopersicum]	-	-	-	-	GO:0005737//cytoplasm;GO:0044424//intracellular part;GO:0031966//mitochondrial membrane;GO:0044444//cytoplasmic part;GO:0043229//intracellular organelle;GO:0031975//envelope;GO:0043227//membrane-bounded organelle;GO:0016020//membrane;GO:0044446//intracellular organelle part;GO:0044455//mitochondrial membrane part;GO:0019866//organelle inner membrane;GO:0005622//intracellular;GO:0005740//mitochond…	-	GO:0044710//single-organism metabolic process;GO:0044699//single-organism process;GO:0008152//metabolic process
101254519	91	39	7.72	3.49	-1.14537	2.03e-05	0.000182406	yes	XP_010326090.1	PREDICTED: LOW QUALITY PROTEIN: vacuolar cation/proton exchanger 3 [Solanum lycopersicum]	-	-	-	-	GO:0016020//membrane;GO:0031224//intrinsic component of membrane;GO:0044425//membrane part	GO:0022891//substrate-specific transmembrane transporter activity;GO:0015297//antiporter activity;GO:0008324//cation transmembrane transporter activity;GO:0046873//metal ion transmembrane transporter activity;GO:0099516//ion antiporter activity;GO:0015085//calcium ion transmembrane transporter activity;GO:0022857//transmembrane transporter activity;GO:0022890//inorganic cation transmembrane trans…	GO:0044699//single-organism process;GO:0009987//cellular process;GO:0072511//divalent inorganic cation transport;GO:0044765//single-organism transport;GO:0006812//cation transport;GO:0006811//ion transport;GO:0070838//divalent metal ion transport;GO:0030001//metal ion transport;GO:0044763//single-organism cellular process;GO:0006810//transport;GO:1902578//single-organism localization;GO:0051179//…
101254541	41	15	9.23	3.56	-1.37445	0.00186826	0.0100504	yes	XP_004248678.1	PREDICTED: peptidyl-prolyl cis-trans isomerase-like [Solanum lycopersicum]	-	-	-	-	GO:0005622//intracellular;GO:0005623//cell;GO:0044424//intracellular part;GO:0044464//cell part	GO:0033218//amide binding;GO:0005488//binding;GO:0016853//isomerase activity;GO:0016859//cis-trans isomerase activity;GO:0003824//catalytic activity	GO:0044238//primary metabolic process;GO:0019538//protein metabolic process;GO:0036211//protein modification process;GO:0018208//peptidyl-proline modification;GO:0044267//cellular protein metabolic process;GO:0043412//macromolecule modification;GO:0044260//cellular macromolecule metabolic process;GO:0006464//cellular protein modification process;GO:0043170//macromolecule metabolic process;GO:0044…
101254556	68	29	5.76	2.56	-1.16993	0.000315728	0.00212799	yes	XP_010316682.1	PREDICTED: F-box/LRR-repeat protein At3g03360-like isoform X2 [Solanum lycopersicum]	-	-	-	-	-	-	-
101254557	31	5	2.99	0.51	-2.55158	2.27e-05	0.000201292	yes	XP_004250566.1	C2H2-like zinc finger protein [Theobroma cacao]	-	-	-	-	-	GO:0043167//ion binding;GO:0003824//catalytic activity;GO:0043169//cation binding;GO:0005488//binding;GO:0016757//transferase activity, transferring glycosyl groups;GO:0016740//transferase activity;GO:0016763//transferase activity, transferring pentosyl groups	-
101254568	20	5	1.6	0.42	-1.92961	0.00409952	0.0196635	yes	XP_010317463.1	PREDICTED: alpha-L-fucosidase 1 [Solanum lycopersicum]	Metabolism	Glycan biosynthesis and metabolism	ko00511//Other glycan degradation	K01206	-	GO:0015928//fucosidase activity;GO:0016787//hydrolase activity;GO:0004553//hydrolase activity, hydrolyzing O-glycosyl compounds;GO:0016798//hydrolase activity, acting on glycosyl bonds;GO:0003824//catalytic activity	GO:0071704//organic substance metabolic process;GO:0044723//single-organism carbohydrate metabolic process;GO:0019318//hexose metabolic process;GO:0044281//small molecule metabolic process;GO:0008152//metabolic process;GO:0005996//monosaccharide metabolic process;GO:0044699//single-organism process;GO:0044238//primary metabolic process;GO:0005975//carbohydrate metabolic process;GO:0044710//single…
101254583	222	95	9.48	4.28	-1.14728	2.43e-11	5.3e-10	yes	XP_004235966.1	PREDICTED: chaperone protein ClpB1 [Solanum lycopersicum]	-	-	-	-	-	GO:0032550//purine ribonucleoside binding;GO:0097367//carbohydrate derivative binding;GO:0032549//ribonucleoside binding;GO:0001882//nucleoside binding;GO:0005488//binding;GO:0097159//organic cyclic compound binding;GO:0001883//purine nucleoside binding;GO:1901363//heterocyclic compound binding;GO:0036094//small molecule binding	GO:0043170//macromolecule metabolic process;GO:0071704//organic substance metabolic process;GO:0008152//metabolic process
101254608	27	96	2.74	10.27	1.90619	5.71e-11	1.2e-09	yes	XP_019070194.1	PREDICTED: branched-chain-amino-acid aminotransferase 2, chloroplastic-like [Solanum lycopersicum]	Metabolism	Metabolism of cofactors and vitamins;Amino acid metabolism;Global and Overview	ko01230//Biosynthesis of amino acids;ko00270//Cysteine and methionine metabolism;ko01210//2-Oxocarboxylic acid metabolism;ko00280//Valine, leucine and isoleucine degradation;ko00770//Pantothenate and CoA biosynthesis;ko00290//Valine, leucine and isoleucine biosynthesis	K00826	-	GO:0016740//transferase activity;GO:0004084//branched-chain-amino-acid transaminase activity;GO:0008483//transaminase activity;GO:0003824//catalytic activity;GO:0016769//transferase activity, transferring nitrogenous groups	GO:0006082//organic acid metabolic process;GO:0006807//nitrogen compound metabolic process;GO:1901564//organonitrogen compound metabolic process;GO:0044710//single-organism metabolic process;GO:0044281//small molecule metabolic process;GO:0071704//organic substance metabolic process;GO:0044238//primary metabolic process;GO:0019752//carboxylic acid metabolic process;GO:0044699//single-organism pro…
101254620	146	57	10.19	4.2	-1.27869	3.72e-09	6.16e-08	yes	XP_019070568.1	carotenoid cleavage dioxygenase 8, chloroplastic-like [Solanum lycopersicum]	Metabolism	Metabolism of terpenoids and polyketides	ko00906//Carotenoid biosynthesis	K17913	GO:0044422//organelle part;GO:0005623//cell;GO:0044424//intracellular part;GO:0009532//plastid stroma;GO:0043231//intracellular membrane-bounded organelle;GO:0044435//plastid part;GO:0043229//intracellular organelle;GO:0044446//intracellular organelle part;GO:0009536//plastid;GO:0005737//cytoplasm;GO:0043227//membrane-bounded organelle;GO:0043226//organelle;GO:0044444//cytoplasmic part;GO:0005622…	GO:0016491//oxidoreductase activity;GO:0003824//catalytic activity;GO:0043169//cation binding;GO:0043167//ion binding;GO:0016701//oxidoreductase activity, acting on single donors with incorporation of molecular oxygen;GO:0005488//binding	GO:0016108//tetraterpenoid metabolic process;GO:0071669//plant-type cell wall organization or biogenesis;GO:0006721//terpenoid metabolic process;GO:0006714//sesquiterpenoid metabolic process;GO:0050896//response to stimulus;GO:0009887//organ morphogenesis;GO:0044249//cellular biosynthetic process;GO:0048731//system development;GO:0044255//cellular lipid metabolic process;GO:0008300//isoprenoid ca…
101254622	16	2	0.83	0.11	-2.91561	0.00131833	0.00744945	yes	NP_001317708.1	PREDICTED: subtilisin-like protease SDD1 [Solanum lycopersicum]	-	-	-	-	-	GO:0004175//endopeptidase activity;GO:0016787//hydrolase activity;GO:0070011//peptidase activity, acting on L-amino acid peptides;GO:0003824//catalytic activity;GO:0008233//peptidase activity	GO:0019538//protein metabolic process;GO:0044238//primary metabolic process;GO:0071704//organic substance metabolic process;GO:0043170//macromolecule metabolic process;GO:0008152//metabolic process
101254639	1143	454	98.45	41.26	-1.25465	1.3e-56	3.23e-54	yes	XP_004247823.1	PREDICTED: probable pectate lyase 8 [Solanum lycopersicum]	Metabolism	Carbohydrate metabolism	ko00040//Pentose and glucuronate interconversions	K01728	-	GO:0005488//binding;GO:0016829//lyase activity;GO:0003824//catalytic activity;GO:0016837//carbon-oxygen lyase activity, acting on polysaccharides;GO:0043169//cation binding;GO:0016835//carbon-oxygen lyase activity;GO:0043167//ion binding	GO:0000272//polysaccharide catabolic process;GO:0016052//carbohydrate catabolic process;GO:1901575//organic substance catabolic process;GO:0008152//metabolic process;GO:0009057//macromolecule catabolic process;GO:0044238//primary metabolic process;GO:0005975//carbohydrate metabolic process;GO:0009056//catabolic process;GO:0043170//macromolecule metabolic process;GO:0071704//organic substance meta…
101254675	50	20	4.93	2.08	-1.245	0.00111498	0.0064451	yes	XP_004253139.1	PREDICTED: metal tolerance protein 4-like [Solanum lycopersicum]	-	-	-	-	GO:0044425//membrane part;GO:0016020//membrane;GO:0031224//intrinsic component of membrane	GO:0022891//substrate-specific transmembrane transporter activity;GO:0022857//transmembrane transporter activity;GO:0015075//ion transmembrane transporter activity;GO:0005215//transporter activity;GO:0022892//substrate-specific transporter activity	GO:0009987//cellular process;GO:0044765//single-organism transport;GO:0006812//cation transport;GO:1902578//single-organism localization;GO:0006811//ion transport;GO:0044763//single-organism cellular process;GO:0044699//single-organism process;GO:0006810//transport;GO:0051179//localization;GO:0051234//establishment of localization
101254694	26	8	2	0.65	-1.62149	0.00458378	0.021561	yes	XP_010320641.1	PREDICTED: UPF0481 protein At3g47200-like isoform X1 [Solanum lycopersicum]	-	-	-	-	-	-	-
101254705	189	66	17.6	6.49	-1.43929	1.54e-13	4.21e-12	yes	XP_004242161.1	Carboxyl-terminal proteinase-like protein [Medicago truncatula]	-	-	-	-	-	-	-
101254751	343	656	50.02	100.93	1.01278	5.21e-26	3.64e-24	yes	XP_004249924.1	PREDICTED: very-long-chain enoyl-CoA reductase-like [Solanum lycopersicum]	-	-	-	-	GO:0044464//cell part;GO:0016020//membrane;GO:0031224//intrinsic component of membrane;GO:0005737//cytoplasm;GO:0044424//intracellular part;GO:0005622//intracellular;GO:0005623//cell;GO:0044425//membrane part	GO:0003824//catalytic activity;GO:0016491//oxidoreductase activity	GO:0008152//metabolic process;GO:0044699//single-organism process;GO:0044710//single-organism metabolic process;GO:0044238//primary metabolic process
101254764	151	43	9.3	2.79	-1.73697	6.61e-14	1.87e-12	yes	XP_004251874.1	PREDICTED: FK506-binding protein 5-like [Solanum tuberosum]	-	-	-	-	-	-	-
101254766	18	1	3.27	0.19	-4.10522	7.68e-05	0.000608599	yes	XP_004234562.1	PREDICTED: homeobox-leucine zipper protein ATHB-21-like isoform X1 [Solanum lycopersicum]	-	-	-	-	-	-	-
101254783	1209	539	197.78	93.03	-1.08813	1.08e-47	1.93e-45	yes	XP_004237241.1	PREDICTED: RNA-binding protein FUS-like [Solanum lycopersicum]	-	-	-	-	-	-	-
101254806	26	9	6.93	2.53	-1.45372	0.00909852	0.0377587	yes	XP_004241330.1	PREDICTED: photosystem I subunit O [Solanum lycopersicum]	Metabolism	Energy metabolism	ko00195//Photosynthesis	K14332	GO:0044464//cell part;GO:0044425//membrane part;GO:0034357//photosynthetic membrane;GO:0044446//intracellular organelle part;GO:0005623//cell;GO:0009536//plastid;GO:0043227//membrane-bounded organelle;GO:0044444//cytoplasmic part;GO:0031224//intrinsic component of membrane;GO:0032991//macromolecular complex;GO:0005737//cytoplasm;GO:0043234//protein complex;GO:0098796//membrane protein complex;GO:…	GO:0005488//binding	GO:0080090//regulation of primary metabolic process;GO:0006873//cellular ion homeostasis;GO:0044710//single-organism metabolic process;GO:0030001//metal ion transport;GO:0006796//phosphate-containing compound metabolic process;GO:0016053//organic acid biosynthetic process;GO:0008152//metabolic process;GO:0006753//nucleoside phosphate metabolic process;GO:0044281//small molecule metabolic process;…
101254821	52	24	5.36	2.61	-1.03818	0.00390268	0.0188657	yes	XP_010325516.1	PREDICTED: spermidine hydroxycinnamoyl transferase-like [Solanum lycopersicum]	-	-	-	-	-	GO:0003824//catalytic activity;GO:0016746//transferase activity, transferring acyl groups;GO:0016740//transferase activity	-
101254854	16	2	1.84	0.24	-2.9386	0.00131833	0.00744945	yes	XP_004249178.1	PREDICTED: peroxidase A2 [Solanum lycopersicum]	Metabolism	Biosynthesis of other secondary metabolites	ko00940//Phenylpropanoid biosynthesis	K00430	-	GO:0005488//binding;GO:0097159//organic cyclic compound binding;GO:0043167//ion binding;GO:0046906//tetrapyrrole binding;GO:0043169//cation binding;GO:0016209//antioxidant activity;GO:0003824//catalytic activity;GO:1901363//heterocyclic compound binding	GO:0044237//cellular metabolic process;GO:0006950//response to stress;GO:0009987//cellular process;GO:0008152//metabolic process;GO:0044699//single-organism process;GO:0050896//response to stimulus;GO:0072593//reactive oxygen species metabolic process;GO:0042743//hydrogen peroxide metabolic process;GO:0044710//single-organism metabolic process
101254908	3	43	0.22	3.28	3.89812	2.57e-10	4.93e-09	yes	XP_004242239.1	PREDICTED: cannabidiolic acid synthase-like [Solanum lycopersicum]	-	-	-	-	-	GO:0016616//oxidoreductase activity, acting on the CH-OH group of donors, NAD or NADP as acceptor;GO:0003824//catalytic activity;GO:0000166//nucleotide binding;GO:0016491//oxidoreductase activity;GO:0036094//small molecule binding;GO:0097159//organic cyclic compound binding;GO:0016614//oxidoreductase activity, acting on CH-OH group of donors;GO:1901363//heterocyclic compound binding;GO:0005488//b…	GO:0008152//metabolic process;GO:0044710//single-organism metabolic process;GO:0044699//single-organism process
101254980	41	3	2.97	0.23	-3.69076	3.12e-09	5.24e-08	yes	XP_004252635.1	PREDICTED: cytochrome P450 78A7 [Solanum lycopersicum]	-	-	-	-	GO:0016020//membrane;GO:0031224//intrinsic component of membrane;GO:0044425//membrane part	GO:0016491//oxidoreductase activity;GO:1901363//heterocyclic compound binding;GO:0046906//tetrapyrrole binding;GO:0043169//cation binding;GO:0097159//organic cyclic compound binding;GO:0043167//ion binding;GO:0046914//transition metal ion binding;GO:0003824//catalytic activity;GO:0046872//metal ion binding;GO:0005488//binding	GO:0099402//plant organ development;GO:0044767//single-organism developmental process;GO:0009886//post-embryonic morphogenesis;GO:0048608//reproductive structure development;GO:0065007//biological regulation;GO:0009791//post-embryonic development;GO:0044702//single organism reproductive process;GO:0032502//developmental process;GO:0048731//system development;GO:0051239//regulation of multicellula…
101254989	355	164	20.45	9.97	-1.03644	1.16e-14	3.59e-13	yes	XP_004236984.1	PREDICTED: ABC transporter G family member 21 [Solanum lycopersicum]	-	-	-	-	GO:0031224//intrinsic component of membrane;GO:0044425//membrane part;GO:0016020//membrane	GO:1901363//heterocyclic compound binding;GO:0016462//pyrophosphatase activity;GO:0017111//nucleoside-triphosphatase activity;GO:0001882//nucleoside binding;GO:0097367//carbohydrate derivative binding;GO:0001883//purine nucleoside binding;GO:0016817//hydrolase activity, acting on acid anhydrides;GO:0032550//purine ribonucleoside binding;GO:0097159//organic cyclic compound binding;GO:0016818//hydr…	GO:0051234//establishment of localization;GO:0051179//localization
101255006	15	1	4.95	0.35	-3.822	0.000521183	0.0033312	yes	XP_004241838.1	PREDICTED: beta-mannosyltransferase 1-like [Malus domestica]	-	-	-	-	-	-	-
101255045	11	1	2.58	0.25	-3.36737	0.00636217	0.0283546	yes	XP_004231821.1	PREDICTED: mavicyanin isoform X1 [Solanum lycopersicum]	-	-	-	-	-	GO:0043169//cation binding;GO:0046872//metal ion binding;GO:0005488//binding;GO:0046914//transition metal ion binding;GO:0043167//ion binding	-
101255067	45	11	4.33	1.12	-1.95087	8.94e-06	8.6e-05	yes	XP_004251958.1	PREDICTED: metal tolerance protein 9 [Solanum lycopersicum]	-	-	-	-	GO:0016020//membrane;GO:0044425//membrane part;GO:0031224//intrinsic component of membrane	GO:0015075//ion transmembrane transporter activity;GO:0022857//transmembrane transporter activity;GO:0022891//substrate-specific transmembrane transporter activity;GO:0022892//substrate-specific transporter activity;GO:0005215//transporter activity	GO:1902578//single-organism localization;GO:0044765//single-organism transport;GO:0006810//transport;GO:0006811//ion transport;GO:0044699//single-organism process;GO:0009987//cellular process;GO:0044763//single-organism cellular process;GO:0006812//cation transport;GO:0051179//localization;GO:0051234//establishment of localization
101255070	232	106	7.86	3.74	-1.07149	2.44e-10	4.71e-09	yes	XP_004252098.1	PREDICTED: kinesin-related protein 6-like, partial [Solanum tuberosum]	-	-	-	-	GO:0032991//macromolecular complex;GO:0015630//microtubule cytoskeleton;GO:0005875//microtubule associated complex;GO:0005622//intracellular;GO:0043226//organelle;GO:0043229//intracellular organelle;GO:0044424//intracellular part;GO:0043232//intracellular non-membrane-bounded organelle;GO:0044446//intracellular organelle part;GO:0044422//organelle part;GO:0005856//cytoskeleton;GO:0043228//non-mem…	GO:0016818//hydrolase activity, acting on acid anhydrides, in phosphorus-containing anhydrides;GO:0005488//binding;GO:0001883//purine nucleoside binding;GO:0008092//cytoskeletal protein binding;GO:0032549//ribonucleoside binding;GO:0003774//motor activity;GO:0016787//hydrolase activity;GO:0016817//hydrolase activity, acting on acid anhydrides;GO:0017111//nucleoside-triphosphatase activity;GO:0001…	GO:0044699//single-organism process;GO:0009987//cellular process;GO:0007017//microtubule-based process;GO:0044763//single-organism cellular process
101255099	141	67	8.03	3.88	-1.04934	2.09e-06	2.26e-05	yes	XP_010321364.1	PREDICTED: U4/U6 small nuclear ribonucleoprotein Prp3-like [Solanum lycopersicum]	Genetic Information Processing	Transcription	ko03040//Spliceosome	K12843	GO:0043226//organelle;GO:0005634//nucleus;GO:0044422//organelle part;GO:0030532//small nuclear ribonucleoprotein complex;GO:0043227//membrane-bounded organelle;GO:0043229//intracellular organelle;GO:0044428//nuclear part;GO:0030529//intracellular ribonucleoprotein complex;GO:0044464//cell part;GO:0043231//intracellular membrane-bounded organelle;GO:1990904//ribonucleoprotein complex;GO:0044446//i…	-	GO:0046483//heterocycle metabolic process;GO:0008152//metabolic process;GO:0006725//cellular aromatic compound metabolic process;GO:0006396//RNA processing;GO:0006807//nitrogen compound metabolic process;GO:0043170//macromolecule metabolic process;GO:0010467//gene expression;GO:0000377//RNA splicing, via transesterification reactions with bulged adenosine as nucleophile;GO:0034641//cellular nitro…
101255155	31	7	2.48	0.59	-2.07155	0.00019356	0.00139356	yes	XP_004232395.1	sulfite exporter TauE/SafE family protein [Medicago truncatula]	-	-	-	-	GO:0044425//membrane part;GO:0016020//membrane;GO:0031224//intrinsic component of membrane	GO:0016779//nucleotidyltransferase activity;GO:0034062//RNA polymerase activity;GO:0003824//catalytic activity;GO:0016740//transferase activity;GO:0016772//transferase activity, transferring phosphorus-containing groups	GO:0043170//macromolecule metabolic process;GO:0071704//organic substance metabolic process;GO:0009059//macromolecule biosynthetic process;GO:0008152//metabolic process;GO:1901576//organic substance biosynthetic process;GO:0009058//biosynthetic process
101255164	91	20	5.41	1.25	-2.1137	4.22e-11	9.01e-10	yes	XP_004250959.1	PREDICTED: heat shock cognate 70 kDa protein [Solanum lycopersicum]	Genetic Information Processing;Cellular Processes	Transport and catabolism;Transcription;Folding, sorting and degradation	ko04141//Protein processing in endoplasmic reticulum;ko03040//Spliceosome;ko04144//Endocytosis	K03283	GO:0030312//external encapsulating structure;GO:0044424//intracellular part;GO:0005737//cytoplasm;GO:0043231//intracellular membrane-bounded organelle;GO:0044422//organelle part;GO:0005623//cell;GO:0005622//intracellular;GO:0031090//organelle membrane;GO:0044464//cell part;GO:0016020//membrane;GO:0071944//cell periphery;GO:0044444//cytoplasmic part;GO:0043227//membrane-bounded organelle;GO:004322…	GO:0005515//protein binding;GO:0005488//binding;GO:0001883//purine nucleoside binding;GO:0032549//ribonucleoside binding;GO:0097159//organic cyclic compound binding;GO:0001882//nucleoside binding;GO:0032550//purine ribonucleoside binding;GO:1901363//heterocyclic compound binding;GO:0036094//small molecule binding;GO:0044389//ubiquitin-like protein ligase binding;GO:0019899//enzyme binding;GO:0097…	GO:0050789//regulation of biological process;GO:0033554//cellular response to stress;GO:0010468//regulation of gene expression;GO:0034645//cellular macromolecule biosynthetic process;GO:0044238//primary metabolic process;GO:0043170//macromolecule metabolic process;GO:0051716//cellular response to stimulus;GO:0009058//biosynthetic process;GO:0019538//protein metabolic process;GO:0044267//cellular …
101255223	139	57	15.37	6.65	-1.20869	4.09e-08	5.85e-07	yes	XP_010325030.1	PREDICTED: heat shock factor protein HSF30 isoform X1 [Solanum lycopersicum]	-	-	-	-	GO:0044464//cell part;GO:0043227//membrane-bounded organelle;GO:0005622//intracellular;GO:0043226//organelle;GO:0043229//intracellular organelle;GO:0043231//intracellular membrane-bounded organelle;GO:0044424//intracellular part;GO:0005623//cell	GO:0005488//binding;GO:1901363//heterocyclic compound binding;GO:0001071//nucleic acid binding transcription factor activity;GO:0097159//organic cyclic compound binding;GO:0003677//DNA binding;GO:0003676//nucleic acid binding	GO:0006355//regulation of transcription, DNA-templated;GO:0009987//cellular process;GO:0019219//regulation of nucleobase-containing compound metabolic process;GO:0019538//protein metabolic process;GO:0008152//metabolic process;GO:0043170//macromolecule metabolic process;GO:0006950//response to stress;GO:0009266//response to temperature stimulus;GO:0044237//cellular metabolic process;GO:0033554//c…
101255226	30	9	1.56	0.49	-1.67069	0.00167444	0.0091557	yes	NP_001317080.1	PREDICTED: subtilisin-like protease [Solanum lycopersicum]	-	-	-	-	-	GO:0016787//hydrolase activity;GO:0070011//peptidase activity, acting on L-amino acid peptides;GO:0008233//peptidase activity;GO:0003824//catalytic activity;GO:0004175//endopeptidase activity	GO:0019538//protein metabolic process;GO:0008152//metabolic process;GO:0043170//macromolecule metabolic process;GO:0071704//organic substance metabolic process;GO:0044238//primary metabolic process
101255245	12	1	2.83	0.25	-3.5008	0.0034275	0.0169317	yes	XP_004230327.1	plant/F25P12-18 protein [Medicago truncatula]	-	-	-	-	-	-	-
101255272	532	233	39.99	18.48	-1.11367	1.38e-23	8.43e-22	yes	XP_004234482.1	PREDICTED: beta-glucosidase 46-like [Solanum lycopersicum]	Metabolism	Carbohydrate metabolism;Metabolism of other amino acids;Biosynthesis of other secondary metabolites	ko00500//Starch and sucrose metabolism;ko00940//Phenylpropanoid biosynthesis;ko00460//Cyanoamino acid metabolism	K05350	-	GO:0016798//hydrolase activity, acting on glycosyl bonds;GO:0016787//hydrolase activity;GO:0003824//catalytic activity	GO:0008152//metabolic process;GO:0044238//primary metabolic process
101255285	70	12	2.67	0.52	-2.36026	2.44e-10	4.7e-09	yes	XP_004236222.1	BnaA06g16800D [Brassica napus]	-	-	-	-	-	-	GO:0019637//organophosphate metabolic process;GO:0044763//single-organism cellular process;GO:0009791//post-embryonic development;GO:0009886//post-embryonic morphogenesis;GO:0046496//nicotinamide nucleotide metabolic process;GO:0016070//RNA metabolic process;GO:0009657//plastid organization;GO:0032501//multicellular organismal process;GO:0044237//cellular metabolic process;GO:0009987//cellular pr…
101255301	39	199	3.09	16.61	2.42637	1.24e-28	1.02e-26	yes	XP_004240167.1	PREDICTED: serine carboxypeptidase-like [Solanum lycopersicum]	-	-	-	-	-	GO:0003824//catalytic activity;GO:0008233//peptidase activity;GO:0008238//exopeptidase activity;GO:0016787//hydrolase activity;GO:0070011//peptidase activity, acting on L-amino acid peptides;GO:0004180//carboxypeptidase activity	GO:0044238//primary metabolic process;GO:0019538//protein metabolic process;GO:0008152//metabolic process;GO:0043170//macromolecule metabolic process;GO:0071704//organic substance metabolic process
101255322	35	5	3.4	0.51	-2.73697	2.48e-06	2.64e-05	yes	XP_004245935.1	PREDICTED: phosphoribulokinase, chloroplastic [Solanum lycopersicum]	Metabolism	Global and Overview;Energy metabolism	ko01200//Carbon metabolism;ko00710//Carbon fixation in photosynthetic organisms	K00855	GO:0044422//organelle part;GO:0031967//organelle envelope;GO:0043227//membrane-bounded organelle;GO:0043226//organelle;GO:0005737//cytoplasm;GO:0044464//cell part;GO:0031975//envelope;GO:0044435//plastid part;GO:0044424//intracellular part;GO:0044444//cytoplasmic part;GO:0044434//chloroplast part;GO:0005576//extracellular region;GO:0009526//plastid envelope;GO:0044446//intracellular organelle par…	GO:1901363//heterocyclic compound binding;GO:0036094//small molecule binding;GO:0005488//binding;GO:0016740//transferase activity;GO:0032549//ribonucleoside binding;GO:0032550//purine ribonucleoside binding;GO:0097159//organic cyclic compound binding;GO:0001882//nucleoside binding;GO:0003824//catalytic activity;GO:0097367//carbohydrate derivative binding;GO:0001883//purine nucleoside binding;GO:0…	GO:0031323//regulation of cellular metabolic process;GO:0034641//cellular nitrogen compound metabolic process;GO:0006790//sulfur compound metabolic process;GO:0051179//localization;GO:0080090//regulation of primary metabolic process;GO:0043933//macromolecular complex subunit organization;GO:0006739//NADP metabolic process;GO:0034660//ncRNA metabolic process;GO:1901360//organic cyclic compound met…
101255331	802	366	34.5	16.61	-1.05454	2.17e-31	2.05e-29	yes	XP_004247083.1	PREDICTED: probable LRR receptor-like serine/threonine-protein kinase At5g48740 [Solanum lycopersicum]	-	-	-	-	GO:0031224//intrinsic component of membrane;GO:0016020//membrane;GO:0044425//membrane part	GO:0005057//receptor signaling protein activity;GO:1901363//heterocyclic compound binding;GO:0003824//catalytic activity;GO:0001882//nucleoside binding;GO:0097159//organic cyclic compound binding;GO:0016773//phosphotransferase activity, alcohol group as acceptor;GO:0005488//binding;GO:0004672//protein kinase activity;GO:0097367//carbohydrate derivative binding;GO:0016301//kinase activity;GO:00167…	GO:0045937//positive regulation of phosphate metabolic process;GO:0044700//single organism signaling;GO:0050790//regulation of catalytic activity;GO:0010604//positive regulation of macromolecule metabolic process;GO:0045859//regulation of protein kinase activity;GO:0001932//regulation of protein phosphorylation;GO:0080090//regulation of primary metabolic process;GO:0044036//cell wall macromolecul…
101255343	21	44	1.02	2.26	1.14775	0.00266805	0.013612	yes	XP_004231319.1	PREDICTED: receptor-like protein kinase BRI1-like 3 [Solanum lycopersicum]	-	-	-	-	GO:0031224//intrinsic component of membrane;GO:0044425//membrane part;GO:0016020//membrane	GO:0001883//purine nucleoside binding;GO:0003824//catalytic activity;GO:0032549//ribonucleoside binding;GO:0032550//purine ribonucleoside binding;GO:0097367//carbohydrate derivative binding;GO:0005488//binding;GO:1901363//heterocyclic compound binding;GO:0016740//transferase activity;GO:0016301//kinase activity;GO:0004672//protein kinase activity;GO:0036094//small molecule binding;GO:0001882//nuc…	GO:0006793//phosphorus metabolic process;GO:0043170//macromolecule metabolic process;GO:0044238//primary metabolic process;GO:0006796//phosphate-containing compound metabolic process;GO:0009987//cellular process;GO:0044237//cellular metabolic process;GO:0019538//protein metabolic process;GO:0006464//cellular protein modification process;GO:0044260//cellular macromolecule metabolic process;GO:0043…
101255360	63	123	4.39	9.04	1.0421	2.55e-06	2.7e-05	yes	XP_019067754.1	PREDICTED: E3 ubiquitin-protein ligase brl2 isoform X1 [Populus euphratica]	-	-	-	-	-	GO:0043169//cation binding;GO:0046872//metal ion binding;GO:0046914//transition metal ion binding;GO:0005488//binding;GO:0043167//ion binding	GO:0000003//reproduction;GO:0009887//organ morphogenesis;GO:0003006//developmental process involved in reproduction;GO:0048731//system development;GO:0048569//post-embryonic organ development;GO:0009886//post-embryonic morphogenesis;GO:0009908//flower development;GO:0044699//single-organism process;GO:0048449//floral organ formation;GO:0048563//post-embryonic organ morphogenesis;GO:0007275//multi…
101255381	18	35	2.76	5.64	1.03103	0.0127768	0.0497598	yes	XP_019068592.1	Calmodulin binding protein-like isoform 2 [Theobroma cacao]	-	-	-	-	-	-	-
101255419	17	2	0.64	0.08	-3	0.000732495	0.00449361	yes	XP_004246167.2	PREDICTED: histone-lysine N-methyltransferase, H3 lysine-9 specific SUVH8-like [Solanum lycopersicum]	Metabolism	Amino acid metabolism	ko00310//Lysine degradation	K11420	GO:0043231//intracellular membrane-bounded organelle;GO:0043229//intracellular organelle;GO:0005623//cell;GO:0043228//non-membrane-bounded organelle;GO:0044464//cell part;GO:0043232//intracellular non-membrane-bounded organelle;GO:0043226//organelle;GO:0043227//membrane-bounded organelle;GO:0005622//intracellular;GO:0044424//intracellular part	GO:0043167//ion binding;GO:0046872//metal ion binding;GO:0008276//protein methyltransferase activity;GO:0016741//transferase activity, transferring one-carbon groups;GO:0008757//S-adenosylmethionine-dependent methyltransferase activity;GO:0008168//methyltransferase activity;GO:0046914//transition metal ion binding;GO:0003824//catalytic activity;GO:0016279//protein-lysine N-methyltransferase activ…	GO:0008152//metabolic process;GO:0016571//histone methylation;GO:0006464//cellular protein modification process;GO:0051276//chromosome organization;GO:0016043//cellular component organization;GO:0043933//macromolecular complex subunit organization;GO:0044238//primary metabolic process;GO:0006479//protein methylation;GO:0016570//histone modification;GO:0044237//cellular metabolic process;GO:004471…
101255425	163	398	22.75	58.6	1.36503	6.67e-26	4.61e-24	yes	XP_004246773.3	PREDICTED: protein LURP-one-related 5-like [Solanum lycopersicum]	-	-	-	-	-	-	-
101255468	88	281	16.63	56.03	1.75241	2.66e-26	1.92e-24	yes	NP_001307321.1	PREDICTED: miraculin [Solanum lycopersicum]	-	-	-	-	-	GO:0098772//molecular function regulator;GO:0030234//enzyme regulator activity;GO:0061135//endopeptidase regulator activity;GO:0061134//peptidase regulator activity;GO:0003824//catalytic activity;GO:0016787//hydrolase activity	GO:0045861//negative regulation of proteolysis;GO:0080090//regulation of primary metabolic process;GO:0032269//negative regulation of cellular protein metabolic process;GO:0010605//negative regulation of macromolecule metabolic process;GO:0009892//negative regulation of metabolic process;GO:0031323//regulation of cellular metabolic process;GO:0032268//regulation of cellular protein metabolic proc…
101255474	18	62	1.82	6.62	1.86289	2.39e-07	3.01e-06	yes	XP_004252384.1	PREDICTED: omega-6 fatty acid desaturase, endoplasmic reticulum isozyme 2-like [Solanum lycopersicum]	Metabolism	Global and Overview;Lipid metabolism	ko01212//Fatty acid metabolism;ko01040//Biosynthesis of unsaturated fatty acids	K10256	-	-	-
101255481	25	7	3.59	1.06	-1.75992	0.00335045	0.0166042	yes	XP_004235809.1	PREDICTED: transcription factor BEE 3 [Solanum lycopersicum]	-	-	-	-	-	GO:0005515//protein binding;GO:0005488//binding	-
101255575	21	43	2.46	5.3	1.10733	0.00374401	0.0182234	yes	XP_004236052.1	PREDICTED: uncharacterized serine-rich protein C215.13-like [Solanum tuberosum]	-	-	-	-	-	-	-
101255580	15	1	1.96	0.14	-3.80735	0.000521183	0.0033312	yes	XP_004236899.2	PREDICTED: myb family transcription factor APL isoform X2 [Vitis vinifera]	-	-	-	-	-	GO:0005488//binding;GO:0003676//nucleic acid binding;GO:1901363//heterocyclic compound binding;GO:0097159//organic cyclic compound binding	-
101255625	477	954	44.43	93.75	1.07728	4.34e-40	6.18e-38	yes	XP_004229435.1	PREDICTED: basic 7S globulin-like [Solanum lycopersicum]	-	-	-	-	-	GO:0016787//hydrolase activity;GO:0008233//peptidase activity;GO:0070011//peptidase activity, acting on L-amino acid peptides;GO:0003824//catalytic activity;GO:0004175//endopeptidase activity	GO:0071704//organic substance metabolic process;GO:0019538//protein metabolic process;GO:0008152//metabolic process;GO:0044238//primary metabolic process;GO:0043170//macromolecule metabolic process
101255652	47	17	12.45	4.75	-1.39015	0.000629585	0.00392778	yes	XP_004250426.1	PREDICTED: wound-induced proteinase inhibitor 2-like [Solanum lycopersicum]	-	-	-	-	-	GO:0004866//endopeptidase inhibitor activity;GO:0030414//peptidase inhibitor activity;GO:0098772//molecular function regulator;GO:0004857//enzyme inhibitor activity;GO:0061135//endopeptidase regulator activity;GO:0030234//enzyme regulator activity;GO:0061134//peptidase regulator activity	GO:0031323//regulation of cellular metabolic process;GO:0032268//regulation of cellular protein metabolic process;GO:0030162//regulation of proteolysis;GO:0065009//regulation of molecular function;GO:0065007//biological regulation;GO:0051336//regulation of hydrolase activity;GO:0032269//negative regulation of cellular protein metabolic process;GO:0048523//negative regulation of cellular process;G…
101255712	13	0	1.95	0.001	-10.9293	0.000245094	0.00171495	yes	XP_004243231.1	PREDICTED: protodermal factor 1 [Solanum lycopersicum]	-	-	-	-	-	-	-
101255720	48	20	5.97	2.62	-1.18816	0.0022238	0.0116786	yes	XP_004228340.1	PREDICTED: transmembrane protein 45B-like [Solanum lycopersicum]	-	-	-	-	-	-	-
101255725	54	25	4.89	2.39	-1.03282	0.00324248	0.0161282	yes	XP_004246432.1	PREDICTED: aspartic proteinase PCS1 [Solanum lycopersicum]	-	-	-	-	GO:0043231//intracellular membrane-bounded organelle;GO:0044464//cell part;GO:0043226//organelle;GO:0005622//intracellular;GO:0043229//intracellular organelle;GO:0043227//membrane-bounded organelle;GO:0005623//cell;GO:0044424//intracellular part	GO:0070011//peptidase activity, acting on L-amino acid peptides;GO:0004175//endopeptidase activity;GO:0016787//hydrolase activity;GO:0008233//peptidase activity;GO:0003824//catalytic activity	GO:0019538//protein metabolic process;GO:0008152//metabolic process;GO:0043170//macromolecule metabolic process;GO:0044763//single-organism cellular process;GO:0071704//organic substance metabolic process;GO:0044699//single-organism process;GO:0044238//primary metabolic process;GO:0016265//death;GO:0008219//cell death;GO:0009987//cellular process
101255753	55	18	5.76	1.99	-1.5333	5.22e-05	0.000429941	yes	XP_004250176.1	PREDICTED: GDSL esterase/lipase At5g37690 [Solanum lycopersicum]	-	-	-	-	-	GO:0016787//hydrolase activity;GO:0003824//catalytic activity	GO:0044710//single-organism metabolic process;GO:0044238//primary metabolic process;GO:0008152//metabolic process;GO:0006629//lipid metabolic process;GO:0044699//single-organism process;GO:0071704//organic substance metabolic process
101255775	455	175	30.33	12.31	-1.30091	7.2e-26	4.96e-24	yes	XP_004234960.1	PREDICTED: probable pectinesterase/pectinesterase inhibitor 61 [Solanum lycopersicum]	-	-	-	-	GO:0005623//cell;GO:0030312//external encapsulating structure;GO:0071944//cell periphery;GO:0044464//cell part	GO:0016788//hydrolase activity, acting on ester bonds;GO:0098772//molecular function regulator;GO:0052689//carboxylic ester hydrolase activity;GO:0016787//hydrolase activity;GO:0003824//catalytic activity;GO:0030234//enzyme regulator activity	GO:0008152//metabolic process;GO:0048519//negative regulation of biological process;GO:1901575//organic substance catabolic process;GO:0071554//cell wall organization or biogenesis;GO:0019222//regulation of metabolic process;GO:0000272//polysaccharide catabolic process;GO:0009892//negative regulation of metabolic process;GO:0005975//carbohydrate metabolic process;GO:0009057//macromolecule catabol…
101255779	488	202	77.23	33.73	-1.19513	2.96e-24	1.87e-22	yes	XP_004235810.1	PREDICTED: thaumatin-like protein [Solanum lycopersicum]	-	-	-	-	-	-	-
101255801	59	12	5.73	1.23	-2.21988	6.59e-08	9.21e-07	yes	XP_004241756.1	PREDICTED: probable transcription factor KAN2 isoform X1 [Solanum lycopersicum]	-	-	-	-	-	GO:0005488//binding;GO:0097159//organic cyclic compound binding;GO:1901363//heterocyclic compound binding;GO:0003676//nucleic acid binding	-
101255811	21	6	2.5	0.75	-1.73697	0.00595708	0.0268646	yes	XP_004243853.1	PREDICTED: mitogen-activated protein kinase kinase kinase A-like [Solanum lycopersicum]	-	-	-	-	-	GO:0003824//catalytic activity;GO:0016301//kinase activity;GO:0032549//ribonucleoside binding;GO:0001882//nucleoside binding;GO:0016773//phosphotransferase activity, alcohol group as acceptor;GO:0032550//purine ribonucleoside binding;GO:1901363//heterocyclic compound binding;GO:0036094//small molecule binding;GO:0005488//binding;GO:0097159//organic cyclic compound binding;GO:0097367//carbohydrate…	GO:0043412//macromolecule modification;GO:0044267//cellular protein metabolic process;GO:0071704//organic substance metabolic process;GO:0008152//metabolic process;GO:0019538//protein metabolic process;GO:0006464//cellular protein modification process;GO:0044238//primary metabolic process;GO:0009987//cellular process;GO:0036211//protein modification process;GO:0006793//phosphorus metabolic proces…
101255817	44	11	4.83	1.27	-1.92719	1.44e-05	0.000133082	yes	XP_004245767.1	PREDICTED: probable pectinesterase 68 [Solanum lycopersicum]	-	-	-	-	GO:0071944//cell periphery;GO:0044464//cell part;GO:0005623//cell;GO:0030312//external encapsulating structure	GO:0016788//hydrolase activity, acting on ester bonds;GO:0016787//hydrolase activity;GO:0003824//catalytic activity;GO:0052689//carboxylic ester hydrolase activity	GO:0043412//macromolecule modification;GO:0016568//chromatin modification;GO:0016569//covalent chromatin modification;GO:0006996//organelle organization;GO:1901575//organic substance catabolic process;GO:0044237//cellular metabolic process;GO:0036211//protein modification process;GO:0044238//primary metabolic process;GO:0051276//chromosome organization;GO:0016570//histone modification;GO:0006464/…
101255843	84	28	3.94	1.39	-1.50311	5.26e-07	6.29e-06	yes	XP_004231388.1	PREDICTED: calponin homology domain-containing protein DDB_G0272472 [Nicotiana tomentosiformis]	-	-	-	-	-	-	GO:0048856//anatomical structure development;GO:0003006//developmental process involved in reproduction;GO:0009653//anatomical structure morphogenesis;GO:0044767//single-organism developmental process;GO:0048731//system development;GO:0044702//single organism reproductive process;GO:0048449//floral organ formation;GO:0048563//post-embryonic organ morphogenesis;GO:0090567//reproductive shoot syste…
101255889	69	145	5.87	13.01	1.14819	3.99e-08	5.71e-07	yes	XP_004239935.1	PREDICTED: BAHD acyltransferase DCR [Solanum lycopersicum]	-	-	-	-	-	GO:0016740//transferase activity;GO:0003824//catalytic activity;GO:0016746//transferase activity, transferring acyl groups	-
101255915	415	192	26.32	12.85	-1.03439	6.8e-17	2.58e-15	yes	XP_019071263.1	PREDICTED: interactor of constitutive active ROPs 2, chloroplastic [Solanum lycopersicum]	-	-	-	-	-	GO:0005488//binding;GO:0005515//protein binding	-
101255928	54	104	8.24	16.75	1.02344	2.25e-05	0.000199345	yes	XP_004248055.1	PREDICTED: pollen-specific leucine-rich repeat extensin-like protein 3 isoform X1 [Solanum lycopersicum]	-	-	-	-	-	-	-
101255971	58	199	6.4	23.16	1.85549	1.61e-20	8.11e-19	yes	XP_004235310.1	PREDICTED: mitochondrial phosphate carrier protein 3, mitochondrial [Solanum lycopersicum]	-	-	-	-	GO:0031975//envelope;GO:0043227//membrane-bounded organelle;GO:0044444//cytoplasmic part;GO:0009536//plastid;GO:0031090//organelle membrane;GO:0019866//organelle inner membrane;GO:0031224//intrinsic component of membrane;GO:0005737//cytoplasm;GO:0071944//cell periphery;GO:0031967//organelle envelope;GO:0044424//intracellular part;GO:0005622//intracellular;GO:0043226//organelle;GO:0044422//organel…	-	GO:0006006//glucose metabolic process;GO:0044237//cellular metabolic process;GO:0005975//carbohydrate metabolic process;GO:0072524//pyridine-containing compound metabolic process;GO:0051234//establishment of localization;GO:0019637//organophosphate metabolic process;GO:0051186//cofactor metabolic process;GO:0046496//nicotinamide nucleotide metabolic process;GO:0055086//nucleobase-containing small…
101255972	33	96	2.8	8.59	1.61723	6.25e-09	9.98e-08	yes	XP_004235390.1	PREDICTED: protein REVEILLE 7 [Solanum lycopersicum]	-	-	-	-	-	GO:0097159//organic cyclic compound binding;GO:1901363//heterocyclic compound binding;GO:0003676//nucleic acid binding;GO:0005488//binding	-
101255986	74	34	9.22	4.46	-1.04772	0.000460975	0.00299322	yes	XP_004237915.1	PREDICTED: monoacylglycerol lipase abhd6-A isoform X1 [Solanum lycopersicum]	-	-	-	-	-	GO:0003824//catalytic activity	-
101256006	18	1	2.79	0.16	-4.12412	7.68e-05	0.000608599	yes	NP_001317570.1	PREDICTED: chlorophyll a-b binding protein 4, chloroplastic-like [Solanum lycopersicum]	Metabolism	Energy metabolism	ko00196//Photosynthesis - antenna proteins	K08910	GO:0043229//intracellular organelle;GO:0031984//organelle subcompartment;GO:0044436//thylakoid part;GO:0009526//plastid envelope;GO:0043231//intracellular membrane-bounded organelle;GO:0043227//membrane-bounded organelle;GO:0005623//cell;GO:0043226//organelle;GO:0009536//plastid;GO:0044464//cell part;GO:0009521//photosystem;GO:0005737//cytoplasm;GO:0016020//membrane;GO:0044434//chloroplast part;G…	GO:0097159//organic cyclic compound binding;GO:0043167//ion binding;GO:0046906//tetrapyrrole binding;GO:1901363//heterocyclic compound binding;GO:0043169//cation binding;GO:0005488//binding	GO:0000096//sulfur amino acid metabolic process;GO:0019538//protein metabolic process;GO:0006807//nitrogen compound metabolic process;GO:0006790//sulfur compound metabolic process;GO:1901564//organonitrogen compound metabolic process;GO:1902578//single-organism localization;GO:0065008//regulation of biological quality;GO:0019752//carboxylic acid metabolic process;GO:0008152//metabolic process;GO:…
101256007	37	16	3.05	1.39	-1.13372	0.0127768	0.0497598	yes	XP_004241673.1	PREDICTED: protein ASPARTIC PROTEASE IN GUARD CELL 2-like [Solanum lycopersicum]	-	-	-	-	GO:0005576//extracellular region	GO:0016787//hydrolase activity;GO:0003824//catalytic activity;GO:0004175//endopeptidase activity;GO:0008233//peptidase activity;GO:0070011//peptidase activity, acting on L-amino acid peptides	GO:0019538//protein metabolic process;GO:0044238//primary metabolic process;GO:0071704//organic substance metabolic process;GO:0008152//metabolic process;GO:0043170//macromolecule metabolic process
101256058	24	8	1.1	0.39	-1.49596	0.0107331	0.0431997	yes	XP_004233571.1	PREDICTED: phospholipase D delta-like [Solanum lycopersicum]	Cellular Processes;Metabolism	Transport and catabolism;Lipid metabolism	ko04144//Endocytosis;ko00564//Glycerophospholipid metabolism;ko00565//Ether lipid metabolism	K01115	GO:0005623//cell;GO:0043227//membrane-bounded organelle;GO:0043229//intracellular organelle;GO:0005911//cell-cell junction;GO:0016020//membrane;GO:0044424//intracellular part;GO:0005622//intracellular;GO:0044464//cell part;GO:0043231//intracellular membrane-bounded organelle;GO:0030054//cell junction;GO:0043226//organelle	GO:0016788//hydrolase activity, acting on ester bonds;GO:0016787//hydrolase activity;GO:0043169//cation binding;GO:0003824//catalytic activity;GO:0043167//ion binding;GO:0016298//lipase activity;GO:0005488//binding;GO:0004620//phospholipase activity;GO:0046872//metal ion binding	GO:0006793//phosphorus metabolic process;GO:0044710//single-organism metabolic process;GO:0006644//phospholipid metabolic process;GO:0071704//organic substance metabolic process;GO:1901419//regulation of response to alcohol;GO:0044763//single-organism cellular process;GO:0050789//regulation of biological process;GO:0065007//biological regulation;GO:0009966//regulation of signal transduction;GO:00…
101256078	213	85	25.05	10.55	-1.24757	3.31e-12	7.98e-11	yes	XP_010318632.1	PREDICTED: uncharacterized GPI-anchored protein At4g28100 [Solanum lycopersicum]	-	-	-	-	GO:0031224//intrinsic component of membrane;GO:0016020//membrane;GO:0044425//membrane part	-	GO:0044700//single organism signaling;GO:1901700//response to oxygen-containing compound;GO:1901701//cellular response to oxygen-containing compound;GO:0009739//response to gibberellin;GO:0007165//signal transduction;GO:0010033//response to organic substance;GO:0044699//single-organism process;GO:0009987//cellular process;GO:0032502//developmental process;GO:0065007//biological regulation;GO:0003…
101256104	19	130	1.42	10.27	2.85447	1.01e-22	5.86e-21	yes	XP_004243719.1	PREDICTED: cytochrome P450 72A15-like [Solanum lycopersicum]	-	-	-	-	-	GO:0097159//organic cyclic compound binding;GO:0005488//binding;GO:0003824//catalytic activity;GO:0043167//ion binding;GO:0046914//transition metal ion binding;GO:0046906//tetrapyrrole binding;GO:0046872//metal ion binding;GO:0043169//cation binding;GO:1901363//heterocyclic compound binding;GO:0016491//oxidoreductase activity	GO:0044699//single-organism process;GO:0044710//single-organism metabolic process;GO:0008152//metabolic process
101256110	184	82	21.19	9.97	-1.08772	6.69e-09	1.07e-07	yes	XP_004245088.1	PREDICTED: nucleosome assembly protein 1;2-like [Solanum lycopersicum]	-	-	-	-	GO:0043227//membrane-bounded organelle;GO:0043229//intracellular organelle;GO:0005622//intracellular;GO:0044464//cell part;GO:0043231//intracellular membrane-bounded organelle;GO:0044424//intracellular part;GO:0005623//cell;GO:0043226//organelle	-	GO:0006996//organelle organization;GO:0009987//cellular process;GO:0006325//chromatin organization;GO:0043933//macromolecular complex subunit organization;GO:0071824//protein-DNA complex subunit organization;GO:0071822//protein complex subunit organization;GO:0034728//nucleosome organization;GO:0016043//cellular component organization;GO:0051276//chromosome organization;GO:0071840//cellular compo…
101256111	62	26	15.99	7.07	-1.17739	0.000385049	0.00254761	yes	XP_004245768.1	BnaA10g16580D [Brassica napus]	-	-	-	-	GO:0044425//membrane part;GO:0016020//membrane;GO:0031224//intrinsic component of membrane	-	-
101256120	53	19	15.4	5.82	-1.40384	0.000213092	0.00151702	yes	XP_004247085.1	PREDICTED: cytochrome b5 [Solanum lycopersicum]	-	-	-	-	GO:0044425//membrane part;GO:0016020//membrane;GO:0043227//membrane-bounded organelle;GO:0031090//organelle membrane;GO:0005623//cell;GO:0043231//intracellular membrane-bounded organelle;GO:0044464//cell part;GO:0043226//organelle;GO:0043229//intracellular organelle;GO:0031224//intrinsic component of membrane;GO:0044422//organelle part;GO:0044424//intracellular part;GO:0005622//intracellular	GO:0005488//binding;GO:1901363//heterocyclic compound binding;GO:0046906//tetrapyrrole binding;GO:0043169//cation binding;GO:0043167//ion binding;GO:0097159//organic cyclic compound binding	GO:1901576//organic substance biosynthetic process;GO:0006722//triterpenoid metabolic process;GO:0008299//isoprenoid biosynthetic process;GO:0044710//single-organism metabolic process;GO:0009987//cellular process;GO:0044255//cellular lipid metabolic process;GO:0006629//lipid metabolic process;GO:0008610//lipid biosynthetic process;GO:0044237//cellular metabolic process;GO:0044699//single-organism…
101256131	140	35	21.21	5.59	-1.92382	1.35e-14	4.12e-13	yes	NP_001296291.1	chlorophyll a-b binding protein CP24 10B, chloroplastic [Solanum lycopersicum]	Metabolism	Energy metabolism	ko00196//Photosynthesis - antenna proteins	K08917	GO:0044464//cell part;GO:0043234//protein complex;GO:0098796//membrane protein complex;GO:0031984//organelle subcompartment;GO:0009526//plastid envelope;GO:0009507//chloroplast;GO:0009579//thylakoid;GO:0044425//membrane part;GO:0044422//organelle part;GO:0044435//plastid part;GO:0016020//membrane;GO:0005623//cell;GO:0044446//intracellular organelle part;GO:0044424//intracellular part;GO:0005737//…	GO:0043167//ion binding;GO:1901363//heterocyclic compound binding;GO:0043169//cation binding;GO:0046906//tetrapyrrole binding;GO:0097159//organic cyclic compound binding;GO:0005488//binding	GO:0051234//establishment of localization;GO:0044710//single-organism metabolic process;GO:0006520//cellular amino acid metabolic process;GO:0071840//cellular component organization or biogenesis;GO:0044272//sulfur compound biosynthetic process;GO:0006082//organic acid metabolic process;GO:0050896//response to stimulus;GO:0006807//nitrogen compound metabolic process;GO:1901576//organic substance …
101256138	32	9	4.58	1.36	-1.75174	0.000687676	0.0042425	yes	XP_004231166.1	PREDICTED: LOB domain-containing protein 30 [Solanum lycopersicum]	-	-	-	-	GO:0043231//intracellular membrane-bounded organelle;GO:0043226//organelle;GO:0043229//intracellular organelle;GO:0005622//intracellular;GO:0005623//cell;GO:0044424//intracellular part;GO:0044464//cell part;GO:0043227//membrane-bounded organelle	-	GO:0030029//actin filament-based process;GO:0007275//multicellular organism development;GO:0000904//cell morphogenesis involved in differentiation;GO:0010015//root morphogenesis;GO:1902589//single-organism organelle organization;GO:0099402//plant organ development;GO:0048869//cellular developmental process;GO:0009887//organ morphogenesis;GO:0009987//cellular process;GO:0007015//actin filament org…
101256148	137	51	31.19	12.25	-1.3483	3.29e-09	5.5e-08	yes	XP_004250096.1	PREDICTED: CRIB domain-containing protein RIC4-like [Solanum lycopersicum]	-	-	-	-	GO:0044464//cell part;GO:0005886//plasma membrane;GO:0005623//cell;GO:0071944//cell periphery;GO:0016020//membrane	-	GO:0045229//external encapsulating structure organization;GO:0032879//regulation of localization;GO:0030154//cell differentiation;GO:0051128//regulation of cellular component organization;GO:0043062//extracellular structure organization;GO:0048364//root development;GO:0033043//regulation of organelle organization;GO:0090066//regulation of anatomical structure size;GO:0044767//single-organism deve…
101256153	13	36	1.46	4.27	1.54827	0.000949698	0.00561414	yes	XP_004233151.1	PREDICTED: hyoscyamine 6-dioxygenase-like [Solanum lycopersicum]	-	-	-	-	-	GO:0003824//catalytic activity;GO:0051213//dioxygenase activity;GO:0043167//ion binding;GO:0016491//oxidoreductase activity;GO:0016705//oxidoreductase activity, acting on paired donors, with incorporation or reduction of molecular oxygen;GO:0043169//cation binding;GO:0005488//binding	GO:0044710//single-organism metabolic process;GO:0044699//single-organism process;GO:0008152//metabolic process
101256157	42	154	3.33	12.88	1.95154	1.95e-17	7.65e-16	yes	XP_004233715.1	PREDICTED: anthocyanidin 3-O-glucosyltransferase 5 [Solanum lycopersicum]	Metabolism	Biosynthesis of other secondary metabolites	ko00940//Phenylpropanoid biosynthesis	K12356	-	GO:0016740//transferase activity;GO:0016757//transferase activity, transferring glycosyl groups;GO:0003824//catalytic activity	-
101256163	17	4	4.24	1.05	-2.01367	0.00722652	0.0315061	yes	XP_004234852.1	BnaC03g23200D [Brassica napus]	-	-	-	-	-	-	-
101256176	155	354	22.77	54.87	1.26888	8.87e-21	4.54e-19	yes	XP_004237334.1	embryo-abundant family protein [Populus trichocarpa]	-	-	-	-	-	GO:0003824//catalytic activity;GO:0016740//transferase activity;GO:0016741//transferase activity, transferring one-carbon groups	GO:0008152//metabolic process
101256185	20	54	1.69	4.8	1.50601	3.49e-05	0.000298193	yes	XP_004239936.1	PREDICTED: BAHD acyltransferase DCR-like [Solanum lycopersicum]	-	-	-	-	-	GO:0016746//transferase activity, transferring acyl groups;GO:0003824//catalytic activity;GO:0016740//transferase activity	-
101256199	13	30	1.99	4.85	1.28522	0.00963779	0.0395564	yes	XP_004243976.1	PREDICTED: sperm-associated antigen 1 [Solanum lycopersicum]	-	-	-	-	-	-	-
101256215	24	45	4.28	9.05	1.08031	0.00772399	0.0332728	yes	XP_010322654.1	PREDICTED: dual specificity protein phosphatase 1 isoform X1 [Solanum lycopersicum]	-	-	-	-	GO:0005623//cell;GO:0044424//intracellular part;GO:0044464//cell part;GO:0005622//intracellular	GO:0016772//transferase activity, transferring phosphorus-containing groups;GO:0016740//transferase activity;GO:0003824//catalytic activity;GO:0016788//hydrolase activity, acting on ester bonds;GO:0042578//phosphoric ester hydrolase activity;GO:0016787//hydrolase activity;GO:0016791//phosphatase activity;GO:0004721//phosphoprotein phosphatase activity	GO:0031399//regulation of protein modification process;GO:0050896//response to stimulus;GO:0019222//regulation of metabolic process;GO:0043170//macromolecule metabolic process;GO:0051338//regulation of transferase activity;GO:0044237//cellular metabolic process;GO:0032268//regulation of cellular protein metabolic process;GO:0006464//cellular protein modification process;GO:0033673//negative regul…
101256252	44.02	20.05	1.26	0.61	-1.04654	0.00824783	0.0348292	yes	XP_010313468.1	PREDICTED: abscisic-aldehyde oxidase-like [Solanum lycopersicum]	Metabolism	Metabolism of terpenoids and polyketides	ko00906//Carotenoid biosynthesis	K09842	-	GO:0016623//oxidoreductase activity, acting on the aldehyde or oxo group of donors, oxygen as acceptor;GO:0043167//ion binding;GO:0051536//iron-sulfur cluster binding;GO:0043169//cation binding;GO:0000166//nucleotide binding;GO:1901363//heterocyclic compound binding;GO:0046872//metal ion binding;GO:1901265//nucleoside phosphate binding;GO:0016903//oxidoreductase activity, acting on the aldehyde o…	GO:0008152//metabolic process;GO:0065008//regulation of biological quality;GO:0009850//auxin metabolic process;GO:0042445//hormone metabolic process;GO:0065007//biological regulation;GO:0010817//regulation of hormone levels;GO:0044237//cellular metabolic process;GO:0044699//single-organism process;GO:0044710//single-organism metabolic process;GO:0009987//cellular process
101256278	17	2	1.61	0.22	-2.87149	0.000732495	0.00449361	yes	XP_004237416.2	PREDICTED: protein UPSTREAM OF FLC isoform X1 [Solanum lycopersicum]	-	-	-	-	-	-	-
101256324	22	55	8.74	23.05	1.39906	8.47e-05	0.000665903	yes	XP_004229248.1	hypoxia induced protein conserved region containing protein [Zea mays]	-	-	-	-	GO:0016020//membrane;GO:0044425//membrane part;GO:0031224//intrinsic component of membrane	-	-
101256347	30	12	6.71	2.83	-1.24551	0.0115913	0.0460526	yes	XP_004250806.1	PREDICTED: ethylene-responsive transcription factor ERF022-like [Solanum lycopersicum]	-	-	-	-	GO:0044424//intracellular part;GO:0044464//cell part;GO:0043226//organelle;GO:0043227//membrane-bounded organelle;GO:0005623//cell;GO:0005622//intracellular;GO:0043231//intracellular membrane-bounded organelle;GO:0043229//intracellular organelle	GO:0003676//nucleic acid binding;GO:0097159//organic cyclic compound binding;GO:1901363//heterocyclic compound binding;GO:0001071//nucleic acid binding transcription factor activity;GO:0005488//binding	GO:0000160//phosphorelay signal transduction system;GO:0009987//cellular process;GO:0019222//regulation of metabolic process;GO:0050794//regulation of cellular process;GO:0050789//regulation of biological process;GO:0044249//cellular biosynthetic process;GO:0023052//signaling;GO:0065007//biological regulation;GO:0009058//biosynthetic process;GO:0044237//cellular metabolic process;GO:0043170//macr…
101256382	322	122	9.52	3.81	-1.32117	2.25e-19	1.03e-17	yes	XP_010321406.1	PREDICTED: DNA repair protein RAD50 isoform X1 [Solanum lycopersicum]	Genetic Information Processing	Replication and repair	ko03440//Homologous recombination;ko03450//Non-homologous end-joining	K10866	GO:0043234//protein complex;GO:0044422//organelle part;GO:0032991//macromolecular complex;GO:0005622//intracellular;GO:0044424//intracellular part;GO:0044464//cell part;GO:0043227//membrane-bounded organelle;GO:0005694//chromosome;GO:0043232//intracellular non-membrane-bounded organelle;GO:0044427//chromosomal part;GO:0043231//intracellular membrane-bounded organelle;GO:0044446//intracellular org…	GO:0043167//ion binding;GO:0097367//carbohydrate derivative binding;GO:0036094//small molecule binding;GO:0043169//cation binding;GO:0001883//purine nucleoside binding;GO:0016787//hydrolase activity;GO:0046872//metal ion binding;GO:0017111//nucleoside-triphosphatase activity;GO:0016462//pyrophosphatase activity;GO:0003824//catalytic activity;GO:0016817//hydrolase activity, acting on acid anhydrid…	GO:0006310//DNA recombination;GO:0042592//homeostatic process;GO:0050789//regulation of biological process;GO:0071407//cellular response to organic cyclic compound;GO:0032506//cytokinetic process;GO:0044237//cellular metabolic process;GO:0044267//cellular protein metabolic process;GO:0006886//intracellular protein transport;GO:0000278//mitotic cell cycle;GO:0010467//gene expression;GO:0048580//re…
101256404	136	59	3.95	1.81	-1.12586	2.89e-07	3.59e-06	yes	XP_004246103.1	PREDICTED: myosin-4-like [Solanum lycopersicum]	-	-	-	-	-	-	-
101256446	6	21	1.69	6.25	1.88683	0.00595708	0.0268646	yes	XP_004233073.1	PREDICTED: probable inactive dual specificity protein phosphatase-like At4g18593 [Solanum lycopersicum]	-	-	-	-	-	-	-
101256448	61	16	4.43	1.23	-1.84865	9.33e-07	1.06e-05	yes	XP_004233152.3	PREDICTED: tetrahydrocannabinolic acid synthase-like [Solanum lycopersicum]	-	-	-	-	-	GO:1901363//heterocyclic compound binding;GO:0016491//oxidoreductase activity;GO:0097159//organic cyclic compound binding;GO:0016616//oxidoreductase activity, acting on the CH-OH group of donors, NAD or NADP as acceptor;GO:0003824//catalytic activity;GO:0016614//oxidoreductase activity, acting on CH-OH group of donors;GO:0005488//binding;GO:0000166//nucleotide binding;GO:1901265//nucleoside phosp…	GO:0044710//single-organism metabolic process;GO:0044699//single-organism process;GO:0008152//metabolic process
101256465	6	25	0.64	2.83	2.14466	0.000540282	0.00343198	yes	XP_010314691.1	PREDICTED: mitochondrial ribosome-associated GTPase 1 [Solanum lycopersicum]	-	-	-	-	-	GO:0097367//carbohydrate derivative binding;GO:0036094//small molecule binding;GO:0001883//purine nucleoside binding;GO:0001882//nucleoside binding;GO:0005488//binding;GO:0097159//organic cyclic compound binding;GO:1901363//heterocyclic compound binding;GO:0032550//purine ribonucleoside binding;GO:0032549//ribonucleoside binding	-
101256480	43	11	3.67	0.99	-1.89028	2.3e-05	0.000203623	yes	XP_004238163.1	PREDICTED: anthocyanidin 3-O-glucoside 2'''-O-xylosyltransferase-like [Solanum lycopersicum]	Metabolism	Biosynthesis of other secondary metabolites	ko00942//Anthocyanin biosynthesis	K17193	-	GO:0016757//transferase activity, transferring glycosyl groups;GO:0016740//transferase activity;GO:0003824//catalytic activity	-
101256490	88	180	7.48	16.14	1.10953	1.93e-09	3.37e-08	yes	XP_004239937.1	PREDICTED: BAHD acyltransferase DCR-like [Solanum lycopersicum]	-	-	-	-	-	GO:0016740//transferase activity;GO:0016746//transferase activity, transferring acyl groups;GO:0003824//catalytic activity	-
101256540	142	65	12.98	6.27	-1.04975	6.67e-07	7.82e-06	yes	XP_004249930.1	E3 ubiquitin-protein ligase RNF25 [Theobroma cacao]	-	-	-	-	GO:0005623//cell;GO:0044464//cell part;GO:0044444//cytoplasmic part;GO:0005622//intracellular;GO:0044422//organelle part;GO:0043231//intracellular membrane-bounded organelle;GO:0044424//intracellular part;GO:0044446//intracellular organelle part;GO:0043226//organelle;GO:0043229//intracellular organelle;GO:0009532//plastid stroma;GO:0009536//plastid;GO:0044435//plastid part;GO:0043227//membrane-bo…	GO:0003824//catalytic activity	-
101256565	44	13	5.75	1.79	-1.6836	0.000157128	0.00115942	yes	XP_004235045.1	PREDICTED: thaumatin-like protein 1b [Solanum lycopersicum]	-	-	-	-	-	-	-
101256568	5	20	1.77	7.47	2.07736	0.00409952	0.0196635	yes	XP_004235150.1	PREDICTED: 14 kDa proline-rich protein DC2.15-like [Solanum lycopersicum]	-	-	-	-	-	-	-
101256598	10	29	3.09	9.45	1.61271	0.00224347	0.0117534	yes	XP_004241589.1	PREDICTED: dCTP pyrophosphatase 1-like [Solanum lycopersicum]	Metabolism	Nucleotide metabolism	ko00240//Pyrimidine metabolism	K16904	-	-	-
101256601	149	62	38.17	16.76	-1.18742	1.78e-08	2.68e-07	yes	XP_004242436.1	atp-dependent rna helicase dbp7 [Gossypium arboreum]	-	-	-	-	-	-	-
101256629	157	63	23.78	10.07	-1.23969	2.82e-09	4.77e-08	yes	NP_001296324.1	chlorophyll a-b binding protein CP24 10A, chloroplastic [Solanum lycopersicum]	Metabolism	Energy metabolism	ko00196//Photosynthesis - antenna proteins	K08917	GO:0009523//photosystem II;GO:0009536//plastid;GO:0044425//membrane part;GO:0034357//photosynthetic membrane;GO:0009507//chloroplast;GO:0043227//membrane-bounded organelle;GO:0044446//intracellular organelle part;GO:0016020//membrane;GO:0005623//cell;GO:0032991//macromolecular complex;GO:0044436//thylakoid part;GO:0044424//intracellular part;GO:0031224//intrinsic component of membrane;GO:0044434/…	GO:0005488//binding;GO:1901363//heterocyclic compound binding;GO:0097159//organic cyclic compound binding;GO:0046906//tetrapyrrole binding	GO:0051179//localization;GO:1990066//energy quenching;GO:0044711//single-organism biosynthetic process;GO:1901576//organic substance biosynthetic process;GO:0032268//regulation of cellular protein metabolic process;GO:0019752//carboxylic acid metabolic process;GO:0006970//response to osmotic stress;GO:0031399//regulation of protein modification process;GO:0009058//biosynthetic process;GO:0000097/…
101256665	111	43	7.51	3.22	-1.22175	2.9e-07	3.6e-06	yes	XP_004235973.1	PREDICTED: dnaJ homolog subfamily C member 21-like isoform X1 [Solanum lycopersicum]	-	-	-	-	-	GO:0043167//ion binding;GO:0043169//cation binding;GO:0005488//binding	-
101256670	57	23	3.06	1.3	-1.23502	0.000463271	0.00300543	yes	XP_004237186.2	PREDICTED: protein OBERON 3-like [Solanum lycopersicum]	-	-	-	-	-	-	GO:0044699//single-organism process;GO:0044767//single-organism developmental process;GO:0032502//developmental process
101256682	158	326	12.06	26.26	1.12264	3.45e-16	1.22e-14	yes	XP_004241759.1	PREDICTED: probable phosphomevalonate kinase [Solanum lycopersicum]	Metabolism	Metabolism of terpenoids and polyketides	ko00900//Terpenoid backbone biosynthesis	K00938	-	GO:0097367//carbohydrate derivative binding;GO:0003824//catalytic activity;GO:1901363//heterocyclic compound binding;GO:0016740//transferase activity;GO:0032549//ribonucleoside binding;GO:0001882//nucleoside binding;GO:0016301//kinase activity;GO:0032550//purine ribonucleoside binding;GO:0001883//purine nucleoside binding;GO:0036094//small molecule binding;GO:0097159//organic cyclic compound bind…	GO:0016114//terpenoid biosynthetic process;GO:0006720//isoprenoid metabolic process;GO:0044255//cellular lipid metabolic process;GO:0006694//steroid biosynthetic process;GO:0044711//single-organism biosynthetic process;GO:0009058//biosynthetic process;GO:0044763//single-organism cellular process;GO:0008202//steroid metabolic process;GO:1901576//organic substance biosynthetic process;GO:0009987//c…
101256688	42	13	14.87	4.85	-1.61635	0.000361763	0.00240679	yes	XP_004243721.1	PREDICTED: protein ELF4-LIKE 3-like [Solanum lycopersicum]	-	-	-	-	-	-	-
101256693	46	9	5.91	1.22	-2.27628	7.52e-07	8.73e-06	yes	XP_004244460.1	PREDICTED: NAC domain-containing protein 100-like isoform X1 [Solanum lycopersicum]	-	-	-	-	GO:0043227//membrane-bounded organelle;GO:0043226//organelle;GO:0005622//intracellular;GO:0044464//cell part;GO:0043229//intracellular organelle;GO:0044424//intracellular part;GO:0043231//intracellular membrane-bounded organelle;GO:0005623//cell	GO:0003676//nucleic acid binding;GO:0001071//nucleic acid binding transcription factor activity;GO:0005488//binding;GO:0097159//organic cyclic compound binding;GO:1901363//heterocyclic compound binding	GO:0043170//macromolecule metabolic process;GO:0071704//organic substance metabolic process;GO:0065007//biological regulation;GO:0009058//biosynthetic process;GO:0060255//regulation of macromolecule metabolic process;GO:0008152//metabolic process;GO:0019222//regulation of metabolic process;GO:1901576//organic substance biosynthetic process;GO:0009059//macromolecule biosynthetic process;GO:0050789…
101256723	13	0	2.22	0.001	-11.1163	0.000245094	0.00171495	yes	XP_004248685.1	PREDICTED: psbP-like protein 2, chloroplastic [Solanum lycopersicum]	Metabolism	Energy metabolism	ko00195//Photosynthesis	K02717	GO:0044464//cell part;GO:0043231//intracellular membrane-bounded organelle;GO:0043229//intracellular organelle;GO:0043227//membrane-bounded organelle;GO:0009579//thylakoid;GO:0031977//thylakoid lumen;GO:0043226//organelle;GO:0031976//plastid thylakoid;GO:0098796//membrane protein complex;GO:0005623//cell;GO:0043234//protein complex;GO:0005737//cytoplasm;GO:0044446//intracellular organelle part;GO…	GO:0043169//cation binding;GO:0046872//metal ion binding;GO:0005488//binding;GO:0043167//ion binding	GO:0044237//cellular metabolic process;GO:0044085//cellular component biogenesis;GO:0043412//macromolecule modification;GO:0090304//nucleic acid metabolic process;GO:0044763//single-organism cellular process;GO:0019752//carboxylic acid metabolic process;GO:0009987//cellular process;GO:0016070//RNA metabolic process;GO:0044260//cellular macromolecule metabolic process;GO:0006725//cellular aromatic…
101256759	23	7	2.38	0.76	-1.64689	0.00817489	0.034609	yes	XP_004253476.2	PREDICTED: ABC transporter G family member 11-like, partial [Solanum lycopersicum]	-	-	-	-	-	GO:0001882//nucleoside binding;GO:1901363//heterocyclic compound binding;GO:0097367//carbohydrate derivative binding;GO:0032550//purine ribonucleoside binding;GO:0016817//hydrolase activity, acting on acid anhydrides;GO:0005488//binding;GO:0032549//ribonucleoside binding;GO:0036094//small molecule binding;GO:0003824//catalytic activity;GO:0097159//organic cyclic compound binding;GO:0016818//hydro…	-
101256789	0	17	0.001	1.35	10.3987	1.54e-05	0.000141422	yes	XP_010324053.1	basic helix-loop-helix transcription factor [Salvia miltiorrhiza]	-	-	-	-	-	-	-
101256821	75	33	9.1	4.22	-1.10862	0.000214431	0.00152455	yes	XP_004231827.1	PREDICTED: zinc finger protein CONSTANS-LIKE 16 [Solanum lycopersicum]	-	-	-	-	-	-	-
101256851	30	60	1.41	2.88	1.03037	0.000998264	0.0058565	yes	XP_004234691.1	Cyclopropane-fatty-acyl-phospholipid synthase isoform 1 [Theobroma cacao]	-	-	-	-	-	-	GO:0008152//metabolic process;GO:0044710//single-organism metabolic process;GO:0006629//lipid metabolic process;GO:0044238//primary metabolic process;GO:0044699//single-organism process;GO:0071704//organic substance metabolic process
101256852	118	49	12.68	5.18	-1.29153	8.26e-07	9.49e-06	yes	XP_004235046.1	PREDICTED: DNA-binding protein BIN4 [Solanum lycopersicum]	-	-	-	-	GO:0043227//membrane-bounded organelle;GO:0044424//intracellular part;GO:0005622//intracellular;GO:0043229//intracellular organelle;GO:0044464//cell part;GO:0043226//organelle;GO:0032991//macromolecular complex;GO:0005623//cell;GO:0043234//protein complex;GO:0043231//intracellular membrane-bounded organelle	GO:0003677//DNA binding;GO:0003676//nucleic acid binding;GO:0097159//organic cyclic compound binding;GO:0005488//binding;GO:1901363//heterocyclic compound binding;GO:0043566//structure-specific DNA binding	GO:0009889//regulation of biosynthetic process;GO:0033043//regulation of organelle organization;GO:0000904//cell morphogenesis involved in differentiation;GO:0019219//regulation of nucleobase-containing compound metabolic process;GO:0060429//epithelium development;GO:0007015//actin filament organization;GO:0019222//regulation of metabolic process;GO:0010053//root epidermal cell differentiation;GO…
101256872	30	58	7.74	15.78	1.02769	0.00186615	0.010044	yes	XP_004238249.1	PREDICTED: deoxyuridine 5'-triphosphate nucleotidohydrolase [Solanum lycopersicum]	Metabolism	Nucleotide metabolism	ko00240//Pyrimidine metabolism	K01520	-	GO:0016817//hydrolase activity, acting on acid anhydrides;GO:0005488//binding;GO:0016462//pyrophosphatase activity;GO:0003824//catalytic activity;GO:0016787//hydrolase activity;GO:0047429//nucleoside-triphosphate diphosphatase activity;GO:0016818//hydrolase activity, acting on acid anhydrides, in phosphorus-containing anhydrides	GO:0009147//pyrimidine nucleoside triphosphate metabolic process;GO:0046483//heterocycle metabolic process;GO:0009211//pyrimidine deoxyribonucleoside triphosphate metabolic process;GO:0006796//phosphate-containing compound metabolic process;GO:0006793//phosphorus metabolic process;GO:0044281//small molecule metabolic process;GO:0034641//cellular nitrogen compound metabolic process;GO:0019637//org…
101256874	109	45	11.44	4.98	-1.19987	1.63e-06	1.79e-05	yes	XP_004238684.1	PREDICTED: RING-H2 finger protein ATL47 [Solanum lycopersicum]	-	-	-	-	GO:0044425//membrane part;GO:0016020//membrane;GO:0031224//intrinsic component of membrane	GO:0043169//cation binding;GO:0046914//transition metal ion binding;GO:0046872//metal ion binding;GO:0005488//binding;GO:0043167//ion binding	GO:0043412//macromolecule modification;GO:0019538//protein metabolic process;GO:0006464//cellular protein modification process;GO:0044237//cellular metabolic process;GO:0036211//protein modification process;GO:0071704//organic substance metabolic process;GO:0044238//primary metabolic process;GO:0043170//macromolecule metabolic process;GO:0070647//protein modification by small protein conjugation …
101256929	44	19	2.15	0.98	-1.13348	0.00522183	0.0241096	yes	XP_004231532.1	PREDICTED: subtilisin-like protease [Solanum lycopersicum]	-	-	-	-	-	GO:0016787//hydrolase activity;GO:0004175//endopeptidase activity;GO:0008233//peptidase activity;GO:0003824//catalytic activity;GO:0070011//peptidase activity, acting on L-amino acid peptides	GO:0043170//macromolecule metabolic process;GO:0044238//primary metabolic process;GO:0019538//protein metabolic process;GO:0071704//organic substance metabolic process;GO:0008152//metabolic process
101256952	73	32	17.88	8.27	-1.11239	0.000256267	0.00178213	yes	XP_004252302.2	PREDICTED: lamin-like protein [Solanum lycopersicum]	-	-	-	-	-	-	-
101256975	17	37	4.09	9.38	1.19749	0.00388515	0.0187894	yes	XP_004240539.1	PREDICTED: universal stress protein A-like protein [Solanum lycopersicum]	-	-	-	-	GO:0044424//intracellular part;GO:0043227//membrane-bounded organelle;GO:0016020//membrane;GO:0005622//intracellular;GO:0043231//intracellular membrane-bounded organelle;GO:0044464//cell part;GO:0043229//intracellular organelle;GO:0005623//cell;GO:0043226//organelle	GO:0003824//catalytic activity	GO:0010033//response to organic substance;GO:0042221//response to chemical;GO:0050896//response to stimulus
101256996	87	41	8.28	4.12	-1.00699	0.000178219	0.0012983	yes	XP_004246026.1	Eukaryotic initiation factor 4F subunit p150 isoform 1 [Theobroma cacao]	-	-	-	-	-	-	-
101257013	20	3	2.11	0.33	-2.67671	0.000491667	0.00316216	yes	XP_004230333.1	PREDICTED: WAT1-related protein At1g09380-like [Solanum lycopersicum]	-	-	-	-	GO:0016020//membrane;GO:0031224//intrinsic component of membrane;GO:0044425//membrane part	GO:0005215//transporter activity	GO:0009987//cellular process;GO:0044699//single-organism process;GO:0044763//single-organism cellular process
101257066	50	120	5.15	13.04	1.3403	1.02e-08	1.59e-07	yes	XP_004237337.1	PREDICTED: strictosidine synthase 3-like [Solanum lycopersicum]	-	-	-	-	GO:0005623//cell;GO:0030312//external encapsulating structure;GO:0043226//organelle;GO:0043229//intracellular organelle;GO:0030054//cell junction;GO:0043227//membrane-bounded organelle;GO:0044424//intracellular part;GO:0005618//cell wall;GO:0016020//membrane;GO:0044464//cell part;GO:0005911//cell-cell junction;GO:0005622//intracellular;GO:0043231//intracellular membrane-bounded organelle;GO:00719…	GO:0016840//carbon-nitrogen lyase activity;GO:0016829//lyase activity;GO:0016843//amine-lyase activity;GO:0003824//catalytic activity	GO:0008152//metabolic process
101257109	16	2	3.24	0.43	-2.91359	0.00131833	0.00744945	yes	XP_019070989.1	PREDICTED: early light-induced protein 1, chloroplastic isoform X1 [Solanum lycopersicum]	-	-	-	-	GO:0005622//intracellular;GO:0044464//cell part;GO:0043231//intracellular membrane-bounded organelle;GO:0043227//membrane-bounded organelle;GO:0034357//photosynthetic membrane;GO:0044436//thylakoid part;GO:0043234//protein complex;GO:0032991//macromolecular complex;GO:0009521//photosystem;GO:0044425//membrane part;GO:0009579//thylakoid;GO:0009507//chloroplast;GO:0016020//membrane;GO:0044424//intr…	-	GO:0009411//response to UV;GO:0009813//flavonoid biosynthetic process;GO:0009416//response to light stimulus;GO:0044237//cellular metabolic process;GO:0009314//response to radiation;GO:0065007//biological regulation;GO:1901576//organic substance biosynthetic process;GO:0008152//metabolic process;GO:0009987//cellular process;GO:0050896//response to stimulus;GO:0071704//organic substance metabolic …
101257137	49	23	5.33	2.64	-1.0136	0.00640312	0.0285137	yes	XP_010317141.1	PREDICTED: probable galacturonosyltransferase-like 1 [Solanum lycopersicum]	-	-	-	-	GO:0043231//intracellular membrane-bounded organelle;GO:0031090//organelle membrane;GO:0043226//organelle;GO:0043229//intracellular organelle;GO:0044422//organelle part;GO:0005622//intracellular;GO:0043227//membrane-bounded organelle;GO:0016020//membrane;GO:0044424//intracellular part;GO:0044464//cell part;GO:0005623//cell;GO:0031224//intrinsic component of membrane;GO:0044425//membrane part	GO:0016757//transferase activity, transferring glycosyl groups;GO:0016740//transferase activity;GO:0008194//UDP-glycosyltransferase activity;GO:0003824//catalytic activity	GO:0043436//oxoacid metabolic process;GO:0009605//response to external stimulus;GO:0001101//response to acid chemical;GO:0044710//single-organism metabolic process;GO:0000271//polysaccharide biosynthetic process;GO:1901576//organic substance biosynthetic process;GO:0044723//single-organism carbohydrate metabolic process;GO:0042221//response to chemical;GO:0019752//carboxylic acid metabolic proces…
101257186	29	97	4.29	15.15	1.82027	1.95e-10	3.77e-09	yes	XP_004242951.1	PREDICTED: chlorophyll a-b binding protein 4, chloroplastic [Solanum lycopersicum]	Metabolism	Energy metabolism	ko00196//Photosynthesis - antenna proteins	K08911	GO:0044464//cell part;GO:0043231//intracellular membrane-bounded organelle;GO:0005623//cell;GO:0043234//protein complex;GO:0009521//photosystem;GO:0009507//chloroplast;GO:0044424//intracellular part;GO:0043229//intracellular organelle;GO:0043227//membrane-bounded organelle;GO:0044444//cytoplasmic part;GO:0044446//intracellular organelle part;GO:0031224//intrinsic component of membrane;GO:0044436/…	GO:1901363//heterocyclic compound binding;GO:0046906//tetrapyrrole binding;GO:0097159//organic cyclic compound binding;GO:0043169//cation binding;GO:0005488//binding;GO:0043167//ion binding	GO:0016070//RNA metabolic process;GO:0009668//plastid membrane organization;GO:0006996//organelle organization;GO:0044085//cellular component biogenesis;GO:0015979//photosynthesis;GO:0006464//cellular protein modification process;GO:0034641//cellular nitrogen compound metabolic process;GO:0071822//protein complex subunit organization;GO:0043933//macromolecular complex subunit organization;GO:0070…
101257192	2954	766	323.97	88.64	-1.86983	1.38e-235	2.72e-232	yes	XP_004244150.1	PREDICTED: thiamine thiazole synthase, chloroplastic [Solanum lycopersicum]	Metabolism	Metabolism of cofactors and vitamins	ko00730//Thiamine metabolism	K03146	GO:0043226//organelle;GO:0044444//cytoplasmic part;GO:0043231//intracellular membrane-bounded organelle;GO:0044464//cell part;GO:0005623//cell;GO:0043227//membrane-bounded organelle;GO:0044422//organelle part;GO:0005622//intracellular;GO:0009532//plastid stroma;GO:0043229//intracellular organelle;GO:0009526//plastid envelope;GO:0044424//intracellular part;GO:0044435//plastid part;GO:0005737//cyto…	GO:0005488//binding;GO:0046983//protein dimerization activity;GO:0043169//cation binding;GO:0046914//transition metal ion binding;GO:0005515//protein binding;GO:0043167//ion binding;GO:0046872//metal ion binding	GO:0006073//cellular glucan metabolic process;GO:0036211//protein modification process;GO:0044042//glucan metabolic process;GO:0006793//phosphorus metabolic process;GO:0044260//cellular macromolecule metabolic process;GO:0006766//vitamin metabolic process;GO:0006950//response to stress;GO:0044264//cellular polysaccharide metabolic process;GO:0065007//biological regulation;GO:0009605//response to …
101257195	51	17	4.8	1.69	-1.50601	0.000134215	0.00100717	yes	XP_010324582.1	PREDICTED: cyclin-D-binding Myb-like transcription factor 1 [Solanum lycopersicum]	-	-	-	-	-	GO:0005488//binding	-
101257224	45	15	4.63	1.63	-1.50614	0.000401804	0.00264151	yes	XP_004231533.1	calcium-dependent protein kinase [Populus trichocarpa]	-	-	-	-	-	-	-
101257230	45	11	6.79	1.75	-1.95606	8.94e-06	8.6e-05	yes	XP_004249820.1	PREDICTED: GDSL esterase/lipase CPRD49-like [Solanum lycopersicum]	-	-	-	-	-	GO:0003824//catalytic activity;GO:0016787//hydrolase activity	GO:0044699//single-organism process;GO:0044710//single-organism metabolic process;GO:0008152//metabolic process;GO:0009987//cellular process;GO:0044238//primary metabolic process;GO:0071704//organic substance metabolic process;GO:0006629//lipid metabolic process;GO:0044237//cellular metabolic process
101257246	68	147	5.35	12.2	1.18927	1.28e-08	1.96e-07	yes	XP_004252303.1	PREDICTED: UDP-glycosyltransferase 73C1-like [Solanum lycopersicum]	-	-	-	-	-	GO:0016757//transferase activity, transferring glycosyl groups;GO:0003824//catalytic activity;GO:0016740//transferase activity	-
101257278	47	17	4.35	1.66	-1.38983	0.000629585	0.00392778	yes	XP_004242728.1	PREDICTED: RING-H2 finger protein ATL43 [Solanum lycopersicum]	-	-	-	-	GO:0031224//intrinsic component of membrane;GO:0044425//membrane part;GO:0016020//membrane	GO:0005488//binding;GO:0043169//cation binding;GO:0043167//ion binding;GO:0046914//transition metal ion binding;GO:0046872//metal ion binding	GO:0019538//protein metabolic process;GO:0070647//protein modification by small protein conjugation or removal;GO:0044260//cellular macromolecule metabolic process;GO:0008152//metabolic process;GO:0044267//cellular protein metabolic process;GO:0009987//cellular process;GO:0036211//protein modification process;GO:0044237//cellular metabolic process;GO:0071704//organic substance metabolic process;G…
101257283	0	55	0.001	6.63	12.6948	3e-17	1.16e-15	yes	XP_010323844.1	PREDICTED: cell differentiation protein RCD1 homolog [Solanum lycopersicum]	Genetic Information Processing	Folding, sorting and degradation	ko03018//RNA degradation	K12606	-	-	-
101257289	304	608	20.95	44.2	1.0771	1.17e-26	8.55e-25	yes	XP_004245323.1	PREDICTED: protein NRT1/ PTR FAMILY 6.2-like isoform X1 [Solanum lycopersicum]	-	-	-	-	GO:0016020//membrane;GO:0044425//membrane part;GO:0031224//intrinsic component of membrane	GO:0022804//active transmembrane transporter activity;GO:0022857//transmembrane transporter activity;GO:0015291//secondary active transmembrane transporter activity;GO:0005215//transporter activity	GO:0044710//single-organism metabolic process;GO:0044281//small molecule metabolic process;GO:0051234//establishment of localization;GO:0019725//cellular homeostasis;GO:0044765//single-organism transport;GO:0006812//cation transport;GO:0065008//regulation of biological quality;GO:0051179//localization;GO:0006873//cellular ion homeostasis;GO:0042886//amide transport;GO:0044699//single-organism pro…
101257348	0	30	0.001	1.18	10.2046	9.53e-10	1.71e-08	yes	XP_004235251.2	PREDICTED: probable LRR receptor-like serine/threonine-protein kinase At3g47570 isoform X1 [Solanum lycopersicum]	-	-	-	-	GO:0016020//membrane;GO:0044425//membrane part;GO:0031224//intrinsic component of membrane	GO:0004672//protein kinase activity;GO:0016301//kinase activity;GO:0016772//transferase activity, transferring phosphorus-containing groups;GO:0003824//catalytic activity;GO:0032550//purine ribonucleoside binding;GO:0097159//organic cyclic compound binding;GO:0005488//binding;GO:0001883//purine nucleoside binding;GO:0097367//carbohydrate derivative binding;GO:1901363//heterocyclic compound bindin…	GO:0009987//cellular process;GO:0036211//protein modification process;GO:0019538//protein metabolic process;GO:0006796//phosphate-containing compound metabolic process;GO:0006464//cellular protein modification process;GO:0044238//primary metabolic process;GO:0071704//organic substance metabolic process;GO:0008152//metabolic process;GO:0006793//phosphorus metabolic process;GO:0043412//macromolecul…
101257357	105	42	8.31	3.51	-1.24338	1.37e-06	1.52e-05	yes	XP_004236735.1	PREDICTED: glycerol-3-phosphate acyltransferase 5-like [Solanum lycopersicum]	Metabolism	Lipid metabolism	ko00564//Glycerophospholipid metabolism;ko00561//Glycerolipid metabolism	K13508	-	GO:0008374//O-acyltransferase activity;GO:0016746//transferase activity, transferring acyl groups;GO:0003824//catalytic activity;GO:0016747//transferase activity, transferring acyl groups other than amino-acyl groups;GO:0016740//transferase activity	-
101257414	16	3	2.64	0.32	-3.04439	0.00444281	0.0210029	yes	XP_019067341.1	PREDICTED: late blight resistance protein R1-A-like [Nicotiana tomentosiformis]	-	-	-	-	-	-	-
101257464	20	2	2.57	0.27	-3.25074	0.000122056	0.00092458	yes	XP_010319751.1	PREDICTED: protein NEN4 [Solanum lycopersicum]	-	-	-	-	-	GO:0016787//hydrolase activity;GO:0003824//catalytic activity;GO:0004518//nuclease activity;GO:0097159//organic cyclic compound binding;GO:0005488//binding;GO:0016788//hydrolase activity, acting on ester bonds	GO:0046483//heterocycle metabolic process;GO:0006807//nitrogen compound metabolic process;GO:0071704//organic substance metabolic process;GO:0006725//cellular aromatic compound metabolic process;GO:0044238//primary metabolic process;GO:1901360//organic cyclic compound metabolic process;GO:0006139//nucleobase-containing compound metabolic process;GO:0090304//nucleic acid metabolic process;GO:00346…
101257468	266	120	32.06	15.26	-1.07102	5.3e-12	1.24e-10	yes	XP_004239015.1	DNA glycosylase superfamily protein isoform 1 [Theobroma cacao]	Genetic Information Processing	Replication and repair	ko03410//Base excision repair	K01246	-	GO:0016798//hydrolase activity, acting on glycosyl bonds;GO:0016787//hydrolase activity;GO:0003824//catalytic activity;GO:0003905//alkylbase DNA N-glycosylase activity;GO:0019104//DNA N-glycosylase activity;GO:0043733//DNA-3-methylbase glycosylase activity;GO:0016799//hydrolase activity, hydrolyzing N-glycosyl compounds	GO:0051716//cellular response to stimulus;GO:0033554//cellular response to stress;GO:0006139//nucleobase-containing compound metabolic process;GO:0050896//response to stimulus;GO:0008152//metabolic process;GO:0090304//nucleic acid metabolic process;GO:0071704//organic substance metabolic process;GO:0043170//macromolecule metabolic process;GO:0006974//cellular response to DNA damage stimulus;GO:00…
101257473	31	5	3.91	0.66	-2.56663	2.27e-05	0.000201292	yes	XP_004240372.1	PREDICTED: transcription factor PCL1 [Solanum lycopersicum]	-	-	-	-	-	GO:0097159//organic cyclic compound binding;GO:1901363//heterocyclic compound binding;GO:0003676//nucleic acid binding;GO:0005488//binding	-
101257483	616	1313	64.47	144.99	1.16925	1.3e-60	3.74e-58	yes	XP_004242561.1	PREDICTED: acidic mammalian chitinase-like [Solanum lycopersicum]	Metabolism	Carbohydrate metabolism	ko00520//Amino sugar and nucleotide sugar metabolism	K01183	-	GO:0003824//catalytic activity;GO:0004553//hydrolase activity, hydrolyzing O-glycosyl compounds;GO:0016798//hydrolase activity, acting on glycosyl bonds;GO:0016787//hydrolase activity	GO:1901564//organonitrogen compound metabolic process;GO:1901136//carbohydrate derivative catabolic process;GO:0006022//aminoglycan metabolic process;GO:1901135//carbohydrate derivative metabolic process;GO:0008152//metabolic process;GO:1901575//organic substance catabolic process;GO:0009057//macromolecule catabolic process;GO:0071704//organic substance metabolic process;GO:1901565//organonitroge…
101257486	12	1	1.05	0.09	-3.54432	0.0034275	0.0169317	yes	XP_004243480.1	PREDICTED: acetyl-CoA-benzylalcohol acetyltransferase-like [Solanum lycopersicum]	Metabolism	Biosynthesis of other secondary metabolites	ko00940//Phenylpropanoid biosynthesis;ko00941//Flavonoid biosynthesis;ko00945//Stilbenoid, diarylheptanoid and gingerol biosynthesis	K13065	-	GO:0003824//catalytic activity;GO:0016746//transferase activity, transferring acyl groups;GO:0016740//transferase activity	-
101257511	35	12	2.83	1.02	-1.47223	0.00166131	0.00909307	yes	XP_019067418.1	PREDICTED: scopoletin glucosyltransferase-like [Solanum lycopersicum]	-	-	-	-	-	GO:0003824//catalytic activity;GO:0016740//transferase activity;GO:0035251//UDP-glucosyltransferase activity;GO:0008194//UDP-glycosyltransferase activity;GO:0005488//binding;GO:0016758//transferase activity, transferring hexosyl groups;GO:0005515//protein binding;GO:0016757//transferase activity, transferring glycosyl groups;GO:0046527//glucosyltransferase activity	-
101257528	52	16	5.5	1.79	-1.61947	4.58e-05	0.000381338	yes	XP_004232990.1	PREDICTED: GDSL esterase/lipase At5g45670 [Solanum lycopersicum]	-	-	-	-	-	GO:0016627//oxidoreductase activity, acting on the CH-CH group of donors;GO:0016635//oxidoreductase activity, acting on the CH-CH group of donors, quinone or related compound as acceptor;GO:0016787//hydrolase activity;GO:0016491//oxidoreductase activity;GO:0003824//catalytic activity;GO:0016788//hydrolase activity, acting on ester bonds	GO:0044710//single-organism metabolic process;GO:0006720//isoprenoid metabolic process;GO:0008152//metabolic process;GO:0044763//single-organism cellular process;GO:0009987//cellular process;GO:0071704//organic substance metabolic process;GO:0042214//terpene metabolic process;GO:0016119//carotene metabolic process;GO:0044699//single-organism process;GO:0044255//cellular lipid metabolic process;GO…
101257531	45	15	7.62	2.68	-1.50756	0.000401804	0.00264151	yes	XP_004251131.1	PREDICTED: classical arabinogalactan protein 9 [Solanum lycopersicum]	-	-	-	-	-	-	-
101257576	381	154	22.34	9.53	-1.22908	3.25e-20	1.6e-18	yes	XP_004242438.1	PREDICTED: fimbrin-5 [Solanum lycopersicum]	-	-	-	-	-	GO:0008092//cytoskeletal protein binding;GO:0005515//protein binding;GO:0005488//binding	GO:0051641//cellular localization;GO:0006928//movement of cell or subcellular component;GO:0044699//single-organism process;GO:0044763//single-organism cellular process;GO:0009987//cellular process;GO:0051640//organelle localization;GO:0051179//localization
101257599	62	151	3.11	7.98	1.35947	1.28e-10	2.57e-09	yes	NP_001316533.1	PREDICTED: subtilisin-like protease [Solanum lycopersicum]	-	-	-	-	-	GO:0003824//catalytic activity;GO:0070011//peptidase activity, acting on L-amino acid peptides;GO:0004175//endopeptidase activity;GO:0008233//peptidase activity;GO:0016787//hydrolase activity	GO:0071704//organic substance metabolic process;GO:0043170//macromolecule metabolic process;GO:0008152//metabolic process;GO:0019538//protein metabolic process;GO:0044238//primary metabolic process
101257635	167	63	24.17	9.62	-1.32911	8.61e-11	1.76e-09	yes	XP_004251884.1	PREDICTED: protein IQ-DOMAIN 1 [Solanum lycopersicum]	-	-	-	-	-	-	GO:0043170//macromolecule metabolic process;GO:0008152//metabolic process;GO:0045491//xylan metabolic process;GO:0071554//cell wall organization or biogenesis;GO:0071704//organic substance metabolic process;GO:0044036//cell wall macromolecule metabolic process;GO:0044260//cellular macromolecule metabolic process;GO:0010383//cell wall polysaccharide metabolic process;GO:0005975//carbohydrate metab…
101257682	151	58	15.07	6.11	-1.30244	1.11e-09	1.98e-08	yes	XP_004243648.1	PREDICTED: probable pectinesterase 8 [Solanum lycopersicum]	-	-	-	-	GO:0005623//cell;GO:0030312//external encapsulating structure;GO:0044464//cell part;GO:0071944//cell periphery	GO:0052689//carboxylic ester hydrolase activity;GO:0003824//catalytic activity;GO:0016788//hydrolase activity, acting on ester bonds;GO:0016787//hydrolase activity	GO:0005976//polysaccharide metabolic process;GO:1901575//organic substance catabolic process;GO:0071840//cellular component organization or biogenesis;GO:0071704//organic substance metabolic process;GO:0043170//macromolecule metabolic process;GO:0016043//cellular component organization;GO:0005975//carbohydrate metabolic process;GO:0045229//external encapsulating structure organization;GO:0071555/…
101257697	500	171	40.22	14.51	-1.47087	1.11e-33	1.16e-31	yes	XP_004246611.1	PREDICTED: probable pectate lyase 12 [Solanum lycopersicum]	Metabolism	Carbohydrate metabolism	ko00040//Pentose and glucuronate interconversions	K01728	GO:0044425//membrane part;GO:0016020//membrane;GO:0031224//intrinsic component of membrane	GO:0043169//cation binding;GO:0016835//carbon-oxygen lyase activity;GO:0043167//ion binding;GO:0005488//binding;GO:0003824//catalytic activity;GO:0016837//carbon-oxygen lyase activity, acting on polysaccharides;GO:0016829//lyase activity	GO:0044238//primary metabolic process;GO:0005975//carbohydrate metabolic process;GO:1901575//organic substance catabolic process;GO:0009056//catabolic process;GO:0000272//polysaccharide catabolic process;GO:0005976//polysaccharide metabolic process;GO:0008152//metabolic process;GO:0043170//macromolecule metabolic process;GO:0009057//macromolecule catabolic process;GO:0071704//organic substance me…
101257698	189	430	12.62	30.87	1.29049	1.12e-24	7.17e-23	yes	XP_004229051.1	PREDICTED: CTP synthase-like isoform X1 [Solanum lycopersicum]	Metabolism	Nucleotide metabolism	ko00240//Pyrimidine metabolism	K01937	GO:0044444//cytoplasmic part;GO:0044464//cell part;GO:0005622//intracellular;GO:0005623//cell;GO:0005737//cytoplasm;GO:0044424//intracellular part	GO:0016874//ligase activity;GO:0032549//ribonucleoside binding;GO:0016879//ligase activity, forming carbon-nitrogen bonds;GO:0001882//nucleoside binding;GO:0097367//carbohydrate derivative binding;GO:0032550//purine ribonucleoside binding;GO:0097159//organic cyclic compound binding;GO:0036094//small molecule binding;GO:1901363//heterocyclic compound binding;GO:0003824//catalytic activity;GO:00054…	GO:0006793//phosphorus metabolic process;GO:0043170//macromolecule metabolic process;GO:0044711//single-organism biosynthetic process;GO:0046390//ribose phosphate biosynthetic process;GO:0044237//cellular metabolic process;GO:0016072//rRNA metabolic process;GO:0044085//cellular component biogenesis;GO:0090304//nucleic acid metabolic process;GO:0044281//small molecule metabolic process;GO:0009208/…
101257710	59	22	10.25	4.03	-1.34677	0.000130546	0.000982365	yes	XP_004248061.1	PREDICTED: pollen-specific leucine-rich repeat extensin-like protein 1 [Solanum lycopersicum]	-	-	-	-	-	GO:0043169//cation binding;GO:0005488//binding;GO:0043167//ion binding	GO:0044699//single-organism process;GO:0044765//single-organism transport;GO:1902578//single-organism localization;GO:0051234//establishment of localization;GO:0006812//cation transport;GO:0051179//localization;GO:0006811//ion transport;GO:0006810//transport
101257718	51	20	4.51	1.87	-1.27009	0.000783107	0.00475934	yes	XP_004249606.1	PREDICTED: UDP-glucuronic acid decarboxylase 1-like [Solanum lycopersicum]	Metabolism	Carbohydrate metabolism	ko00500//Starch and sucrose metabolism;ko00520//Amino sugar and nucleotide sugar metabolism	K08678	-	GO:0003824//catalytic activity;GO:0016830//carbon-carbon lyase activity;GO:0016831//carboxy-lyase activity;GO:0016829//lyase activity;GO:0048037//cofactor binding;GO:0005488//binding	GO:0008152//metabolic process
101257726	10	1	3.39	0.36	-3.23522	0.0117402	0.0464502	yes	XP_004233078.1	PREDICTED: ubiquitin domain-containing protein 1-like [Solanum lycopersicum]	-	-	-	-	-	-	GO:0009987//cellular process;GO:0071840//cellular component organization or biogenesis;GO:0051234//establishment of localization;GO:0061024//membrane organization;GO:0016192//vesicle-mediated transport;GO:0006810//transport;GO:0016043//cellular component organization;GO:0051179//localization
101257768	141	277	3.81	7.9	1.05206	9.76e-13	2.5e-11	yes	XP_004239178.1	PREDICTED: ABC transporter C family member 3-like [Solanum tuberosum]	-	-	-	-	GO:0031224//intrinsic component of membrane;GO:0044425//membrane part;GO:0016020//membrane	GO:0016817//hydrolase activity, acting on acid anhydrides;GO:0016787//hydrolase activity;GO:0036094//small molecule binding;GO:0022804//active transmembrane transporter activity;GO:0005215//transporter activity;GO:0003824//catalytic activity;GO:0001883//purine nucleoside binding;GO:0001882//nucleoside binding;GO:0005488//binding;GO:1901363//heterocyclic compound binding;GO:0032549//ribonucleoside…	GO:0009987//cellular process;GO:0051234//establishment of localization;GO:0051179//localization;GO:0044699//single-organism process;GO:0044763//single-organism cellular process
101257776	101	42	11.7	5.13	-1.18948	3.2e-06	3.35e-05	yes	XP_004241039.1	PREDICTED: heat stress transcription factor A-6b-like [Solanum lycopersicum]	-	-	-	-	GO:0005623//cell;GO:0043227//membrane-bounded organelle;GO:0043229//intracellular organelle;GO:0043226//organelle;GO:0044424//intracellular part;GO:0044464//cell part;GO:0043231//intracellular membrane-bounded organelle;GO:0005622//intracellular	GO:0001071//nucleic acid binding transcription factor activity;GO:0003677//DNA binding;GO:0003676//nucleic acid binding;GO:1901363//heterocyclic compound binding;GO:0005488//binding;GO:0097159//organic cyclic compound binding	GO:0010468//regulation of gene expression;GO:0060255//regulation of macromolecule metabolic process;GO:0019222//regulation of metabolic process;GO:0050789//regulation of biological process;GO:0006950//response to stress;GO:0050896//response to stimulus;GO:0065007//biological regulation
101257786	8	45	0.86	5.11	2.57091	1.43e-07	1.88e-06	yes	XP_004243481.1	PREDICTED: S-type anion channel SLAH1-like [Solanum lycopersicum]	-	-	-	-	GO:0016020//membrane;GO:0044425//membrane part;GO:0031224//intrinsic component of membrane	GO:0005216//ion channel activity;GO:0005215//transporter activity;GO:0022857//transmembrane transporter activity;GO:0022838//substrate-specific channel activity;GO:0005244//voltage-gated ion channel activity;GO:0022832//voltage-gated channel activity;GO:0015267//channel activity;GO:0022891//substrate-specific transmembrane transporter activity;GO:0015075//ion transmembrane transporter activity;GO…	GO:0032879//regulation of localization;GO:0050801//ion homeostasis;GO:0050789//regulation of biological process;GO:0065007//biological regulation;GO:0034762//regulation of transmembrane transport;GO:0050794//regulation of cellular process;GO:0042592//homeostatic process;GO:0051049//regulation of transport;GO:0043269//regulation of ion transport;GO:0065008//regulation of biological quality;GO:0034…
101257790	30	12	3.77	1.5	-1.3296	0.0115913	0.0460526	yes	XP_010324968.1	Ascorbate peroxidase 6 [Theobroma cacao]	Metabolism	Carbohydrate metabolism;Metabolism of other amino acids	ko00480//Glutathione metabolism;ko00053//Ascorbate and aldarate metabolism	K00434	-	GO:0097159//organic cyclic compound binding;GO:1901363//heterocyclic compound binding;GO:0046906//tetrapyrrole binding;GO:0004601//peroxidase activity;GO:0016209//antioxidant activity;GO:0016684//oxidoreductase activity, acting on peroxide as acceptor;GO:0005488//binding;GO:0003824//catalytic activity;GO:0016491//oxidoreductase activity	GO:0044710//single-organism metabolic process;GO:0006950//response to stress;GO:0044699//single-organism process;GO:0008152//metabolic process;GO:0050896//response to stimulus
101257800	31	12	4.64	1.9	-1.28813	0.00798014	0.0340576	yes	XP_004228995.1	BnaA02g30710D [Brassica napus]	-	-	-	-	-	-	-
101257887	70	31	4.7	2.2	-1.09516	0.000422358	0.0027607	yes	XP_004246355.1	PREDICTED: laccase-4-like [Solanum lycopersicum]	-	-	-	-	GO:0005576//extracellular region	GO:0016491//oxidoreductase activity;GO:0016682//oxidoreductase activity, acting on diphenols and related substances as donors, oxygen as acceptor;GO:0005488//binding;GO:0046872//metal ion binding;GO:0043169//cation binding;GO:0046914//transition metal ion binding;GO:0016679//oxidoreductase activity, acting on diphenols and related substances as donors;GO:0003824//catalytic activity;GO:0043167//io…	GO:0009698//phenylpropanoid metabolic process;GO:0044710//single-organism metabolic process;GO:0009808//lignin metabolic process;GO:1901360//organic cyclic compound metabolic process;GO:0009987//cellular process;GO:0006725//cellular aromatic compound metabolic process;GO:0044237//cellular metabolic process;GO:0044699//single-organism process;GO:0071704//organic substance metabolic process;GO:0044…
101257909	10	31	0.99	3.24	1.71049	0.00095196	0.0056229	yes	XP_004231392.1	PREDICTED: extensin-2-like [Solanum tuberosum]	-	-	-	-	-	-	-
101257914	201	94	18.87	9.33	-1.01615	9.58e-09	1.5e-07	yes	XP_010312230.1	myb family transcription factor family protein [Populus trichocarpa]	-	-	-	-	-	GO:0003676//nucleic acid binding;GO:0005488//binding;GO:1901363//heterocyclic compound binding;GO:0097159//organic cyclic compound binding	-
101257921	32	7	2.87	0.66	-2.12051	0.000117812	0.000895572	yes	XP_004232567.1	C2H2-like zinc finger protein isoform 2 [Theobroma cacao]	-	-	-	-	-	GO:0043167//ion binding;GO:0043169//cation binding;GO:0005488//binding	-
101257992	39	12	5.22	1.69	-1.62703	0.000311016	0.00210213	yes	XP_004245520.1	PREDICTED: ethylene-responsive transcription factor ERF061-like [Solanum lycopersicum]	-	-	-	-	GO:0005623//cell;GO:0044424//intracellular part;GO:0043229//intracellular organelle;GO:0043231//intracellular membrane-bounded organelle;GO:0043226//organelle;GO:0044464//cell part;GO:0043227//membrane-bounded organelle;GO:0005622//intracellular	GO:0097159//organic cyclic compound binding;GO:0005488//binding;GO:0003676//nucleic acid binding;GO:1901363//heterocyclic compound binding;GO:0001071//nucleic acid binding transcription factor activity	GO:0009059//macromolecule biosynthetic process;GO:0071704//organic substance metabolic process;GO:0035556//intracellular signal transduction;GO:0044260//cellular macromolecule metabolic process;GO:0006811//ion transport;GO:0034645//cellular macromolecule biosynthetic process;GO:0006810//transport;GO:0010468//regulation of gene expression;GO:1901576//organic substance biosynthetic process;GO:00602…
101258025	52	116	5.52	12.98	1.23355	1.28e-07	1.69e-06	yes	XP_004250434.1	mitochondrial transcription termination factor-like [Oryza sativa Japonica Group]	-	-	-	-	GO:0005622//intracellular;GO:0044464//cell part;GO:0043226//organelle;GO:0044424//intracellular part;GO:0043227//membrane-bounded organelle;GO:0043229//intracellular organelle;GO:0043231//intracellular membrane-bounded organelle;GO:0005623//cell	GO:0043566//structure-specific DNA binding;GO:0003676//nucleic acid binding;GO:1901363//heterocyclic compound binding;GO:0005488//binding;GO:0003677//DNA binding;GO:0097159//organic cyclic compound binding	GO:0060255//regulation of macromolecule metabolic process;GO:0019222//regulation of metabolic process;GO:0010468//regulation of gene expression;GO:0065007//biological regulation;GO:0050789//regulation of biological process
101258080	46	13	5.78	1.72	-1.74866	6.69e-05	0.000538454	yes	XP_019070555.1	PREDICTED: basic leucine zipper 61 [Solanum lycopersicum]	-	-	-	-	-	GO:0097159//organic cyclic compound binding;GO:0005488//binding;GO:0001071//nucleic acid binding transcription factor activity;GO:1901363//heterocyclic compound binding;GO:0003677//DNA binding;GO:0003676//nucleic acid binding	GO:0050789//regulation of biological process;GO:0065007//biological regulation;GO:0060255//regulation of macromolecule metabolic process;GO:0019222//regulation of metabolic process;GO:0010468//regulation of gene expression
101258110	1423	594	227.06	100	-1.18307	9.97e-63	2.92e-60	yes	XP_004248771.2	PREDICTED: vegetative cell wall protein gp1-like [Solanum lycopersicum]	-	-	-	-	-	-	-
101258158	23	7	0.93	0.3	-1.63227	0.00817489	0.034609	yes	XP_010321747.1	PREDICTED: probable LRR receptor-like serine/threonine-protein kinase At3g47570 isoform X1 [Solanum lycopersicum]	Organismal Systems	Environmental adaptation	ko04626//Plant-pathogen interaction	K13420	GO:0016020//membrane;GO:0044425//membrane part;GO:0031224//intrinsic component of membrane	GO:0097367//carbohydrate derivative binding;GO:0016301//kinase activity;GO:0005488//binding;GO:0004672//protein kinase activity;GO:0036094//small molecule binding;GO:0016740//transferase activity;GO:0016773//phosphotransferase activity, alcohol group as acceptor;GO:0016772//transferase activity, transferring phosphorus-containing groups;GO:0003824//catalytic activity;GO:0001882//nucleoside bindin…	GO:0008152//metabolic process;GO:0044267//cellular protein metabolic process;GO:0043170//macromolecule metabolic process;GO:0044237//cellular metabolic process;GO:0044260//cellular macromolecule metabolic process;GO:0006796//phosphate-containing compound metabolic process;GO:0019538//protein metabolic process;GO:0006793//phosphorus metabolic process;GO:0009987//cellular process;GO:0071704//organi…
101258179	517	133	35.31	9.58	-1.88198	1.82e-48	3.39e-46	yes	XP_004246356.1	PREDICTED: laccase-17-like [Solanum lycopersicum]	-	-	-	-	GO:0005576//extracellular region	GO:0016679//oxidoreductase activity, acting on diphenols and related substances as donors;GO:0016491//oxidoreductase activity;GO:0046914//transition metal ion binding;GO:0043169//cation binding;GO:0043167//ion binding;GO:0016682//oxidoreductase activity, acting on diphenols and related substances as donors, oxygen as acceptor;GO:0003824//catalytic activity;GO:0046872//metal ion binding;GO:0005488…	GO:0010383//cell wall polysaccharide metabolic process;GO:0044763//single-organism cellular process;GO:0044699//single-organism process;GO:0043170//macromolecule metabolic process;GO:0044710//single-organism metabolic process;GO:0071554//cell wall organization or biogenesis;GO:0019438//aromatic compound biosynthetic process;GO:0044249//cellular biosynthetic process;GO:0044711//single-organism bio…
101258195	22	4	6.16	1.18	-2.38414	0.000537698	0.00341858	yes	XP_004230337.1	PREDICTED: protein NIM1-INTERACTING 1-like [Nicotiana sylvestris]	-	-	-	-	-	-	-
101258236	97	39	6.41	2.72	-1.23672	2.67e-06	2.82e-05	yes	XP_004252236.1	DUF1666 family protein [Medicago truncatula]	-	-	-	-	GO:0032991//macromolecular complex;GO:0044424//intracellular part;GO:1990904//ribonucleoprotein complex;GO:0030529//intracellular ribonucleoprotein complex;GO:0044464//cell part;GO:0005622//intracellular;GO:0005623//cell	GO:0005198//structural molecule activity	GO:0043170//macromolecule metabolic process;GO:0008152//metabolic process;GO:0071704//organic substance metabolic process;GO:0010467//gene expression
101258246	109	11	8.7	0.93	-3.22571	4.01e-20	1.96e-18	yes	XP_004236657.1	PREDICTED: microtubule-associated protein 70-5-like [Solanum lycopersicum]	-	-	-	-	GO:0005856//cytoskeleton;GO:0043229//intracellular organelle;GO:0043232//intracellular non-membrane-bounded organelle;GO:0005623//cell;GO:0005622//intracellular;GO:0043228//non-membrane-bounded organelle;GO:0044464//cell part;GO:0044424//intracellular part;GO:0043226//organelle	GO:0008092//cytoskeletal protein binding;GO:0015631//tubulin binding;GO:0005515//protein binding;GO:0005488//binding	GO:0045491//xylan metabolic process;GO:0005976//polysaccharide metabolic process;GO:0071554//cell wall organization or biogenesis;GO:0010383//cell wall polysaccharide metabolic process;GO:0043170//macromolecule metabolic process;GO:0016043//cellular component organization;GO:0008152//metabolic process;GO:0044260//cellular macromolecule metabolic process;GO:0006996//organelle organization;GO:00718…
101258252	6	22	1.02	3.95	1.95328	0.00374236	0.0182234	yes	XP_004237841.1	PREDICTED: probable WRKY transcription factor 51 [Solanum lycopersicum]	-	-	-	-	-	GO:0005488//binding;GO:1901363//heterocyclic compound binding;GO:0097159//organic cyclic compound binding;GO:0003677//DNA binding;GO:0001071//nucleic acid binding transcription factor activity;GO:0003676//nucleic acid binding	GO:0010468//regulation of gene expression;GO:0065007//biological regulation;GO:0060255//regulation of macromolecule metabolic process;GO:0019222//regulation of metabolic process;GO:0050789//regulation of biological process
101258304	161	44	12.61	3.64	-1.79256	1.93e-15	6.38e-14	yes	XP_004247609.1	PREDICTED: cyprosin [Solanum lycopersicum]	-	-	-	-	-	GO:0016787//hydrolase activity;GO:0004175//endopeptidase activity;GO:0070011//peptidase activity, acting on L-amino acid peptides;GO:0008233//peptidase activity;GO:0003824//catalytic activity	GO:0044238//primary metabolic process;GO:0043170//macromolecule metabolic process;GO:0008152//metabolic process;GO:0019538//protein metabolic process;GO:0071704//organic substance metabolic process
101258345	1283.86	607.91	174.17	87.01	-1.00124	5.01e-44	8.21e-42	yes	XP_004235156.1	PREDICTED: probable xyloglucan endotransglucosylase/hydrolase protein 23 [Solanum lycopersicum]	-	-	-	-	GO:0005623//cell;GO:0071944//cell periphery;GO:0044464//cell part;GO:0030312//external encapsulating structure;GO:0005576//extracellular region	GO:0016758//transferase activity, transferring hexosyl groups;GO:0016787//hydrolase activity;GO:0016757//transferase activity, transferring glycosyl groups;GO:0016740//transferase activity;GO:0003824//catalytic activity;GO:0016798//hydrolase activity, acting on glycosyl bonds	GO:0005975//carbohydrate metabolic process;GO:0008152//metabolic process;GO:0009987//cellular process;GO:0071704//organic substance metabolic process;GO:0045229//external encapsulating structure organization;GO:0071840//cellular component organization or biogenesis;GO:0044042//glucan metabolic process;GO:0016043//cellular component organization;GO:0005976//polysaccharide metabolic process;GO:0044…
101258354	20	44	3.04	7.1	1.22375	0.00158952	0.00877339	yes	XP_004236232.1	PREDICTED: motile sperm domain-containing protein 2 isoform X1 [Solanum lycopersicum]	-	-	-	-	GO:0005622//intracellular;GO:0043227//membrane-bounded organelle;GO:0043229//intracellular organelle;GO:0009536//plastid;GO:0044444//cytoplasmic part;GO:0043226//organelle;GO:0043231//intracellular membrane-bounded organelle;GO:0044464//cell part;GO:0005737//cytoplasm;GO:0044424//intracellular part;GO:0005623//cell	-	-
101258361	0	13	0.001	3.05	11.5746	0.000245094	0.00171495	yes	XP_004237467.1	PREDICTED: probable WRKY transcription factor 51 [Solanum lycopersicum]	-	-	-	-	-	GO:0005488//binding;GO:0097159//organic cyclic compound binding;GO:1901363//heterocyclic compound binding;GO:0003676//nucleic acid binding;GO:0003677//DNA binding;GO:0001071//nucleic acid binding transcription factor activity	GO:0010468//regulation of gene expression;GO:0050896//response to stimulus;GO:0019222//regulation of metabolic process;GO:0060255//regulation of macromolecule metabolic process;GO:0065007//biological regulation;GO:0050789//regulation of biological process;GO:0009987//cellular process
101258365	131	52	14.09	5.9	-1.25588	4.72e-08	6.7e-07	yes	XP_010320603.1	PREDICTED: serine/threonine-protein kinase PBS1 isoform X2 [Solanum lycopersicum]	-	-	-	-	-	GO:0001882//nucleoside binding;GO:0032550//purine ribonucleoside binding;GO:0001883//purine nucleoside binding;GO:0004672//protein kinase activity;GO:0004702//receptor signaling protein serine/threonine kinase activity;GO:0004674//protein serine/threonine kinase activity;GO:0005057//receptor signaling protein activity;GO:0004871//signal transducer activity;GO:0005488//binding;GO:0016772//transfer…	GO:0000003//reproduction;GO:0044085//cellular component biogenesis;GO:0036211//protein modification process;GO:0048518//positive regulation of biological process;GO:0048522//positive regulation of cellular process;GO:0005975//carbohydrate metabolic process;GO:0065009//regulation of molecular function;GO:0072593//reactive oxygen species metabolic process;GO:0010562//positive regulation of phosphor…
101258403	82	30	15.95	6.15	-1.3749	3.91e-06	4.01e-05	yes	XP_010318844.1	Argininosuccinate lyase [Gossypium arboreum]	-	-	-	-	-	-	-
101258460	1	20	0.09	1.97	4.45213	2.12e-05	0.000189092	yes	XP_004240174.1	PREDICTED: deacetylvindoline O-acetyltransferase-like isoform X1 [Solanum lycopersicum]	Metabolism	Biosynthesis of other secondary metabolites	ko00940//Phenylpropanoid biosynthesis;ko00941//Flavonoid biosynthesis;ko00945//Stilbenoid, diarylheptanoid and gingerol biosynthesis	K13065	-	GO:0016746//transferase activity, transferring acyl groups;GO:0016740//transferase activity;GO:0003824//catalytic activity	-
101258472	325	132	64.23	27.52	-1.22277	2.66e-17	1.04e-15	yes	XP_004244068.1	PREDICTED: flocculation protein FLO11-like [Solanum lycopersicum]	-	-	-	-	-	-	-
101258529	79	155	9.58	19.84	1.05031	7.74e-08	1.07e-06	yes	XP_004234419.1	PREDICTED: peroxidase P7-like [Solanum lycopersicum]	Metabolism	Biosynthesis of other secondary metabolites	ko00940//Phenylpropanoid biosynthesis	K00430	-	GO:0046906//tetrapyrrole binding;GO:0003824//catalytic activity;GO:0043167//ion binding;GO:1901363//heterocyclic compound binding;GO:0005488//binding;GO:0043169//cation binding;GO:0016209//antioxidant activity;GO:0097159//organic cyclic compound binding	GO:0008152//metabolic process;GO:0050896//response to stimulus;GO:0006950//response to stress;GO:0044710//single-organism metabolic process;GO:0044699//single-organism process
101258532	59	26	15.52	7.22	-1.10406	0.00104117	0.00607688	yes	XP_004234574.1	PREDICTED: U1 small nuclear ribonucleoprotein 70 kDa [Jatropha curcas]	-	-	-	-	-	-	-
101258555	120	49	22.25	9.58	-1.21571	4.24e-07	5.14e-06	yes	XP_004238170.1	BnaA10g05150D [Brassica napus]	-	-	-	-	-	-	GO:0009987//cellular process;GO:0043170//macromolecule metabolic process;GO:0044237//cellular metabolic process;GO:0071554//cell wall organization or biogenesis;GO:0044036//cell wall macromolecule metabolic process;GO:0071704//organic substance metabolic process;GO:0044260//cellular macromolecule metabolic process;GO:0008152//metabolic process;GO:0044238//primary metabolic process
101258651	4	18	0.97	4.59	2.24244	0.00436394	0.0206979	yes	XP_004238505.1	PREDICTED: ethylene-responsive transcription factor LEP-like [Solanum lycopersicum]	-	-	-	-	GO:0005622//intracellular;GO:0044464//cell part;GO:0043229//intracellular organelle;GO:0044424//intracellular part;GO:0043231//intracellular membrane-bounded organelle;GO:0005623//cell;GO:0043227//membrane-bounded organelle;GO:0043226//organelle	GO:0001071//nucleic acid binding transcription factor activity;GO:0003676//nucleic acid binding;GO:1901363//heterocyclic compound binding;GO:0005488//binding;GO:0097159//organic cyclic compound binding	GO:0034645//cellular macromolecule biosynthetic process;GO:0044237//cellular metabolic process;GO:0044249//cellular biosynthetic process;GO:0043170//macromolecule metabolic process;GO:0060255//regulation of macromolecule metabolic process;GO:0050789//regulation of biological process;GO:0065007//biological regulation;GO:0008152//metabolic process;GO:0009058//biosynthetic process;GO:0019222//regula…
101258657	607	247	74.3	32.09	-1.21124	2.19e-30	2.02e-28	yes	XP_004240027.1	PREDICTED: mitochondrial uncoupling protein 5-like [Solanum lycopersicum]	-	-	-	-	GO:0044422//organelle part;GO:0005623//cell;GO:0031224//intrinsic component of membrane;GO:0044425//membrane part;GO:0043229//intracellular organelle;GO:0016020//membrane;GO:0031090//organelle membrane;GO:0031975//envelope;GO:0005622//intracellular;GO:0044464//cell part;GO:0019866//organelle inner membrane;GO:0031967//organelle envelope;GO:0044424//intracellular part;GO:0043227//membrane-bounded …	GO:0005215//transporter activity;GO:0008514//organic anion transmembrane transporter activity;GO:0008509//anion transmembrane transporter activity;GO:0015075//ion transmembrane transporter activity;GO:0022891//substrate-specific transmembrane transporter activity;GO:0046943//carboxylic acid transmembrane transporter activity;GO:0022892//substrate-specific transporter activity;GO:0022857//transmem…	GO:0042221//response to chemical;GO:0006811//ion transport;GO:0046942//carboxylic acid transport;GO:0006810//transport;GO:0009719//response to endogenous stimulus;GO:0051179//localization;GO:0044765//single-organism transport;GO:0044699//single-organism process;GO:0071702//organic substance transport;GO:0046907//intracellular transport;GO:0006820//anion transport;GO:0010243//response to organonit…
101258730	13	34	1.99	5.5	1.46666	0.00211339	0.0111747	yes	XP_019066899.1	PREDICTED: WD repeat-containing protein 26-like, partial [Solanum lycopersicum]	-	-	-	-	-	-	GO:0018193//peptidyl-amino acid modification;GO:0022402//cell cycle process;GO:0032409//regulation of transporter activity;GO:0009653//anatomical structure morphogenesis;GO:0050794//regulation of cellular process;GO:0040029//regulation of gene expression, epigenetic;GO:0048523//negative regulation of cellular process;GO:0042743//hydrogen peroxide metabolic process;GO:0043933//macromolecular compl…
101258800	1	10	0.12	1.26	3.39232	0.0117402	0.0464502	yes	XP_004249024.1	PREDICTED: serine/threonine-protein kinase dst2-like [Solanum tuberosum]	-	-	-	-	-	-	-
101258844	107	47	9.32	4.32	-1.1093	8.11e-06	7.88e-05	yes	XP_004235900.1	PREDICTED: formamidopyrimidine-DNA glycosylase isoform X1 [Solanum lycopersicum]	Genetic Information Processing	Replication and repair	ko03410//Base excision repair	K10563	GO:0005623//cell;GO:0043229//intracellular organelle;GO:0043231//intracellular membrane-bounded organelle;GO:0043226//organelle;GO:0043227//membrane-bounded organelle;GO:0044464//cell part;GO:0005622//intracellular;GO:0044424//intracellular part	GO:0003824//catalytic activity;GO:0046914//transition metal ion binding;GO:0016788//hydrolase activity, acting on ester bonds;GO:0097159//organic cyclic compound binding;GO:0005488//binding;GO:0016787//hydrolase activity;GO:0000702//oxidized base lesion DNA N-glycosylase activity;GO:0004520//endodeoxyribonuclease activity;GO:0016798//hydrolase activity, acting on glycosyl bonds;GO:1901363//hetero…	GO:1901360//organic cyclic compound metabolic process;GO:0006996//organelle organization;GO:0044237//cellular metabolic process;GO:0034655//nucleobase-containing compound catabolic process;GO:0006281//DNA repair;GO:0046700//heterocycle catabolic process;GO:0006950//response to stress;GO:0044763//single-organism cellular process;GO:0000003//reproduction;GO:0006139//nucleobase-containing compound m…
101258850	350	165	23.74	11.81	-1.00731	7.3e-14	2.05e-12	yes	XP_004237077.1	PREDICTED: protein NRT1/ PTR FAMILY 1.2-like [Solanum lycopersicum]	-	-	-	-	-	-	GO:0051234//establishment of localization;GO:0051179//localization
101258935	16	2	4.24	0.56	-2.92057	0.00131833	0.00744945	yes	XP_004253427.2	PREDICTED: uncharacterized protein LOC101258935 [Solanum lycopersicum]	-	-	-	-	-	-	-
101258952	10	0	2.32	0.001	-11.1799	0.00195752	0.0104578	yes	XP_004238943.1	PREDICTED: 30S ribosomal protein 3, chloroplastic-like [Solanum lycopersicum]	-	-	-	-	GO:0009536//plastid;GO:0044424//intracellular part;GO:0005737//cytoplasm;GO:0044434//chloroplast part;GO:0044446//intracellular organelle part;GO:0043229//intracellular organelle;GO:0032991//macromolecular complex;GO:0030529//intracellular ribonucleoprotein complex;GO:0009532//plastid stroma;GO:0005622//intracellular;GO:0044444//cytoplasmic part;GO:0044422//organelle part;GO:0009507//chloroplast;…	GO:0005198//structural molecule activity	GO:0009987//cellular process;GO:0044281//small molecule metabolic process;GO:0008152//metabolic process;GO:0043170//macromolecule metabolic process;GO:0006412//translation;GO:0019752//carboxylic acid metabolic process;GO:0044699//single-organism process;GO:0009058//biosynthetic process;GO:0044238//primary metabolic process;GO:0009653//anatomical structure morphogenesis;GO:0034645//cellular macrom…
101258964	78	15	4.78	0.97	-2.30095	1.75e-10	3.42e-09	yes	XP_004241514.2	PREDICTED: protein NRT1/ PTR FAMILY 2.11-like [Solanum lycopersicum]	-	-	-	-	-	-	GO:0051179//localization;GO:0051234//establishment of localization
101258998	542	138	58.13	15.62	-1.89589	3.37e-51	6.82e-49	yes	NP_001307428.1	PREDICTED: metacaspase-3 [Solanum lycopersicum]	-	-	-	-	-	GO:0003824//catalytic activity;GO:0070011//peptidase activity, acting on L-amino acid peptides;GO:0008233//peptidase activity;GO:0016787//hydrolase activity;GO:0004175//endopeptidase activity	GO:0019538//protein metabolic process;GO:0043170//macromolecule metabolic process;GO:0071704//organic substance metabolic process;GO:0008152//metabolic process;GO:0044238//primary metabolic process
101258999	36	14	4.02	1.65	-1.28473	0.00666709	0.0294228	yes	XP_004248406.1	PREDICTED: dual specificity protein kinase splA-like [Nicotiana tomentosiformis]	Genetic Information Processing	Replication and repair	ko03410//Base excision repair	K01246	-	GO:0016799//hydrolase activity, hydrolyzing N-glycosyl compounds;GO:0003905//alkylbase DNA N-glycosylase activity;GO:0016798//hydrolase activity, acting on glycosyl bonds;GO:0016787//hydrolase activity;GO:0019104//DNA N-glycosylase activity;GO:0003824//catalytic activity;GO:0043733//DNA-3-methylbase glycosylase activity	GO:0044237//cellular metabolic process;GO:0050896//response to stimulus;GO:0044710//single-organism metabolic process;GO:0006281//DNA repair;GO:0043170//macromolecule metabolic process;GO:0044763//single-organism cellular process;GO:0090304//nucleic acid metabolic process;GO:0008152//metabolic process;GO:0034641//cellular nitrogen compound metabolic process;GO:0044699//single-organism process;GO:…
101259031	31	12	2.71	1.11	-1.28773	0.00798014	0.0340576	yes	XP_004235053.1	PREDICTED: UPF0481 protein At3g47200-like [Solanum lycopersicum]	-	-	-	-	-	-	-
101259059	8	0	1.75	0.001	-10.7731	0.00782344	0.0335277	yes	XP_004243569.1	PREDICTED: cytochrome b561 domain-containing protein At4g18260-like [Solanum lycopersicum]	-	-	-	-	GO:0016020//membrane	-	-
101259128	127	53	17.47	7.69	-1.18382	3.02e-07	3.73e-06	yes	XP_010317821.1	PREDICTED: calponin homology domain-containing protein DDB_G0272472-like isoform X3 [Solanum tuberosum]	Genetic Information Processing	Translation	ko03008//Ribosome biogenesis in eukaryotes	K14545	-	-	GO:0006886//intracellular protein transport;GO:0044699//single-organism process;GO:1902582//single-organism intracellular transport;GO:0034613//cellular protein localization;GO:0000003//reproduction;GO:0051641//cellular localization;GO:0032502//developmental process;GO:0003006//developmental process involved in reproduction;GO:0051179//localization;GO:0070727//cellular macromolecule localization;…
101259131	2	13	0.17	1.18	2.79518	0.0074061	0.0321401	yes	XP_010314380.2	PREDICTED: LOW QUALITY PROTEIN: acetyl-CoA-benzylalcohol acetyltransferase-like, partial [Solanum lycopersicum]	Metabolism	Biosynthesis of other secondary metabolites	ko00940//Phenylpropanoid biosynthesis;ko00941//Flavonoid biosynthesis;ko00945//Stilbenoid, diarylheptanoid and gingerol biosynthesis	K13065	-	GO:0016746//transferase activity, transferring acyl groups;GO:0016740//transferase activity;GO:0003824//catalytic activity	-
101259161	158	70	13.32	6.22	-1.09861	6.07e-08	8.5e-07	yes	XP_004241344.1	PREDICTED: aspartic proteinase nepenthesin-1 [Solanum lycopersicum]	-	-	-	-	GO:0071944//cell periphery;GO:0005618//cell wall;GO:0030312//external encapsulating structure;GO:0005623//cell;GO:0044464//cell part	GO:0070011//peptidase activity, acting on L-amino acid peptides;GO:0004175//endopeptidase activity;GO:0003824//catalytic activity;GO:0008233//peptidase activity;GO:0016787//hydrolase activity	GO:0005975//carbohydrate metabolic process;GO:0006520//cellular amino acid metabolic process;GO:0019752//carboxylic acid metabolic process;GO:1901605//alpha-amino acid metabolic process;GO:0044710//single-organism metabolic process;GO:0071704//organic substance metabolic process;GO:1901564//organonitrogen compound metabolic process;GO:0006807//nitrogen compound metabolic process;GO:0008152//metab…
101259165	35	10	2.16	0.65	-1.73252	0.000393673	0.00259594	yes	XP_004242647.1	PREDICTED: protein ECERIFERUM 3 [Solanum lycopersicum]	-	-	-	-	GO:0043229//intracellular organelle;GO:0005622//intracellular;GO:0044464//cell part;GO:0044422//organelle part;GO:0005623//cell;GO:0016020//membrane;GO:0031224//intrinsic component of membrane;GO:0044424//intracellular part;GO:0044425//membrane part;GO:0043231//intracellular membrane-bounded organelle;GO:0031090//organelle membrane;GO:0043227//membrane-bounded organelle;GO:0043226//organelle	GO:0046914//transition metal ion binding;GO:0043169//cation binding;GO:0003824//catalytic activity;GO:0043167//ion binding;GO:0046872//metal ion binding;GO:0005488//binding	GO:0022414//reproductive process;GO:0008152//metabolic process;GO:0044281//small molecule metabolic process;GO:0043436//oxoacid metabolic process;GO:0019752//carboxylic acid metabolic process;GO:0043446//cellular alkane metabolic process;GO:0007275//multicellular organism development;GO:0044767//single-organism developmental process;GO:0032787//monocarboxylic acid metabolic process;GO:0044237//ce…
101259235	17	44	1.34	3.66	1.44961	0.000269861	0.00186138	yes	XP_004237250.1	PREDICTED: glutamate decarboxylase 4 [Solanum lycopersicum]	Metabolism	Amino acid metabolism;Carbohydrate metabolism;Metabolism of other amino acids	ko00410//beta-Alanine metabolism;ko00250//Alanine, aspartate and glutamate metabolism;ko00650//Butanoate metabolism;ko00430//Taurine and hypotaurine metabolism	K01580	-	GO:0043167//ion binding;GO:0016830//carbon-carbon lyase activity;GO:0016831//carboxy-lyase activity;GO:0043168//anion binding;GO:0016829//lyase activity;GO:0005515//protein binding;GO:0005488//binding;GO:0003824//catalytic activity	GO:0009987//cellular process;GO:1902578//single-organism localization;GO:0065008//regulation of biological quality;GO:0051234//establishment of localization;GO:0010035//response to inorganic substance;GO:0048518//positive regulation of biological process;GO:0008152//metabolic process;GO:0008104//protein localization;GO:0071704//organic substance metabolic process;GO:0042592//homeostatic process;G…
101259239	14	3	2.22	0.5	-2.15056	0.0127622	0.0497476	yes	XP_004237723.1	PREDICTED: bidirectional sugar transporter SWEET1-like [Solanum lycopersicum]	-	-	-	-	-	-	GO:0044699//single-organism process;GO:0051179//localization;GO:1902578//single-organism localization;GO:0006810//transport;GO:0051234//establishment of localization;GO:0044765//single-organism transport
101259255	33	5	4.19	0.67	-2.64472	7.56e-06	7.4e-05	yes	XP_004241432.1	PREDICTED: pathogenesis-related protein 5 [Solanum lycopersicum]	-	-	-	-	-	-	-
101259264	53	17	2.91	0.99	-1.55552	6.02e-05	0.000488689	yes	XP_019070425.1	PREDICTED: pathogenesis-related homeodomain protein isoform X1 [Solanum lycopersicum]	-	-	-	-	GO:0043227//membrane-bounded organelle;GO:0043226//organelle;GO:0043231//intracellular membrane-bounded organelle;GO:0005622//intracellular;GO:0043229//intracellular organelle;GO:0044464//cell part;GO:0005623//cell;GO:0044424//intracellular part	GO:0046872//metal ion binding;GO:0097159//organic cyclic compound binding;GO:0046914//transition metal ion binding;GO:0043169//cation binding;GO:0001071//nucleic acid binding transcription factor activity;GO:0003676//nucleic acid binding;GO:1901363//heterocyclic compound binding;GO:0003677//DNA binding;GO:0043167//ion binding;GO:0005488//binding	GO:0019219//regulation of nucleobase-containing compound metabolic process;GO:0051171//regulation of nitrogen compound metabolic process;GO:0010468//regulation of gene expression;GO:0019222//regulation of metabolic process;GO:0050794//regulation of cellular process;GO:0006355//regulation of transcription, DNA-templated;GO:0006950//response to stress;GO:2001141//regulation of RNA biosynthetic proc…
101259357	12	1	0.79	0.07	-3.49643	0.0034275	0.0169317	yes	NP_001318057.1	PREDICTED: polyphenol oxidase E, chloroplastic [Solanum lycopersicum]	Metabolism	Amino acid metabolism;Biosynthesis of other secondary metabolites	ko00350//Tyrosine metabolism;ko00950//Isoquinoline alkaloid biosynthesis	K00422	GO:0043231//intracellular membrane-bounded organelle;GO:0009536//plastid;GO:0044424//intracellular part;GO:0044436//thylakoid part;GO:0031978//plastid thylakoid lumen;GO:0031984//organelle subcompartment;GO:0043229//intracellular organelle;GO:0005622//intracellular;GO:0005737//cytoplasm;GO:0044435//plastid part;GO:0031976//plastid thylakoid;GO:0031977//thylakoid lumen;GO:0044464//cell part;GO:004…	GO:0005488//binding;GO:0016679//oxidoreductase activity, acting on diphenols and related substances as donors;GO:0003824//catalytic activity;GO:0016682//oxidoreductase activity, acting on diphenols and related substances as donors, oxygen as acceptor;GO:0016491//oxidoreductase activity;GO:0043167//ion binding;GO:0043169//cation binding	GO:0044710//single-organism metabolic process;GO:0044699//single-organism process;GO:0042440//pigment metabolic process;GO:0008152//metabolic process
101259403	499	219	13.47	6.24	-1.11013	4.14e-22	2.32e-20	yes	XP_010316381.2	PREDICTED: LOW QUALITY PROTEIN: auxilin-like protein 1 [Solanum lycopersicum]	-	-	-	-	-	-	-
101259456	79	16	4.13	0.88	-2.23057	2.96e-10	5.64e-09	yes	XP_004243487.1	PREDICTED: cellulose synthase-like protein H1 [Solanum lycopersicum]	-	-	-	-	GO:0044425//membrane part;GO:0031224//intrinsic component of membrane;GO:0016020//membrane	GO:0016757//transferase activity, transferring glycosyl groups;GO:0016758//transferase activity, transferring hexosyl groups;GO:0046527//glucosyltransferase activity;GO:0016740//transferase activity;GO:0016759//cellulose synthase activity;GO:0003824//catalytic activity	GO:0005976//polysaccharide metabolic process;GO:0051273//beta-glucan metabolic process;GO:0030243//cellulose metabolic process;GO:0043170//macromolecule metabolic process;GO:0044264//cellular polysaccharide metabolic process;GO:0006073//cellular glucan metabolic process;GO:0044260//cellular macromolecule metabolic process;GO:0044262//cellular carbohydrate metabolic process;GO:0044042//glucan meta…
101259493	67	20	6.41	2.02	-1.66597	1.48e-06	1.64e-05	yes	XP_004231481.1	PREDICTED: photosystem II stability/assembly factor HCF136, chloroplastic isoform X1 [Solanum lycopersicum]	-	-	-	-	GO:0044464//cell part;GO:0031967//organelle envelope;GO:0043226//organelle;GO:0005622//intracellular;GO:0031976//plastid thylakoid;GO:0043229//intracellular organelle;GO:0044436//thylakoid part;GO:0031975//envelope;GO:0009579//thylakoid;GO:0098796//membrane protein complex;GO:0005737//cytoplasm;GO:0005623//cell;GO:0043234//protein complex;GO:0044424//intracellular part;GO:0044444//cytoplasmic par…	-	GO:0044265//cellular macromolecule catabolic process;GO:0044249//cellular biosynthetic process;GO:0050789//regulation of biological process;GO:0044260//cellular macromolecule metabolic process;GO:0044699//single-organism process;GO:0044257//cellular protein catabolic process;GO:0006629//lipid metabolic process;GO:0034622//cellular macromolecular complex assembly;GO:0044281//small molecule metabol…
101259495	48	109	3.75	8.99	1.26143	2.46e-07	3.1e-06	yes	XP_004249445.1	PREDICTED: cytochrome P450 94C1-like [Solanum lycopersicum]	-	-	-	-	-	GO:0046914//transition metal ion binding;GO:1901363//heterocyclic compound binding;GO:0097159//organic cyclic compound binding;GO:0004497//monooxygenase activity;GO:0016491//oxidoreductase activity;GO:0005488//binding;GO:0046906//tetrapyrrole binding;GO:0003824//catalytic activity;GO:0046872//metal ion binding;GO:0016712//oxidoreductase activity, acting on paired donors, with incorporation or red…	GO:0044699//single-organism process;GO:0008152//metabolic process;GO:0044710//single-organism metabolic process
101259521	149	58	26.13	10.73	-1.28406	2.24e-09	3.85e-08	yes	XP_004253309.1	PREDICTED: ferric reduction oxidase 4-like, partial [Solanum lycopersicum]	-	-	-	-	GO:0044425//membrane part;GO:0016020//membrane;GO:0031224//intrinsic component of membrane	GO:0003824//catalytic activity	GO:0044699//single-organism process;GO:0044710//single-organism metabolic process;GO:0008152//metabolic process
101259555	27	9	4.35	1.47	-1.5652	0.00603095	0.0271073	yes	XP_010323663.1	PREDICTED: 17.1 kDa class II heat shock protein-like [Nicotiana sylvestris]	Genetic Information Processing	Folding, sorting and degradation	ko04141//Protein processing in endoplasmic reticulum	K13993	GO:0043229//intracellular organelle;GO:0005623//cell;GO:0042579//microbody;GO:0005622//intracellular;GO:0043226//organelle;GO:0044444//cytoplasmic part;GO:0005737//cytoplasm;GO:0043227//membrane-bounded organelle;GO:0044424//intracellular part;GO:0044464//cell part;GO:0043231//intracellular membrane-bounded organelle	-	GO:0005976//polysaccharide metabolic process;GO:0008152//metabolic process;GO:0043170//macromolecule metabolic process;GO:0044238//primary metabolic process;GO:0044262//cellular carbohydrate metabolic process;GO:0044249//cellular biosynthetic process;GO:0006073//cellular glucan metabolic process;GO:0044260//cellular macromolecule metabolic process;GO:0009987//cellular process;GO:0005982//starch m…
101259599	258	120	2.93	1.45	-1.01485	5.64e-11	1.18e-09	yes	XP_010316301.1	PREDICTED: titin isoform X1 [Solanum lycopersicum]	-	-	-	-	-	-	-
101259686	29	10	16.36	5.95	-1.45921	0.00513866	0.0237935	yes	XP_004249026.1	PREDICTED: NADH dehydrogenase [ubiquinone] 1 alpha subcomplex subunit 1 [Solanum lycopersicum]	Metabolism	Energy metabolism	ko00190//Oxidative phosphorylation	K03945	GO:0005623//cell;GO:0044455//mitochondrial membrane part;GO:0019866//organelle inner membrane;GO:0044429//mitochondrial part;GO:0031975//envelope;GO:0044422//organelle part;GO:0016020//membrane;GO:0044424//intracellular part;GO:0005622//intracellular;GO:0043231//intracellular membrane-bounded organelle;GO:0043229//intracellular organelle;GO:0031090//organelle membrane;GO:0043227//membrane-bounded…	-	GO:0010033//response to organic substance;GO:0035966//response to topologically incorrect protein;GO:0043170//macromolecule metabolic process;GO:0044699//single-organism process;GO:0006950//response to stress;GO:0016043//cellular component organization;GO:1901575//organic substance catabolic process;GO:0044249//cellular biosynthetic process;GO:0071704//organic substance metabolic process;GO:00439…
101259708	118	55	10.96	5.39	-1.02389	1.26e-05	0.000118093	yes	XP_004251216.1	PREDICTED: dnaJ protein homolog [Solanum lycopersicum]	Genetic Information Processing	Folding, sorting and degradation	ko04141//Protein processing in endoplasmic reticulum	K09503	-	GO:0001882//nucleoside binding;GO:0097159//organic cyclic compound binding;GO:0032549//ribonucleoside binding;GO:0043169//cation binding;GO:0043167//ion binding;GO:0032550//purine ribonucleoside binding;GO:0005488//binding;GO:0097367//carbohydrate derivative binding;GO:0001883//purine nucleoside binding;GO:0005515//protein binding;GO:1901363//heterocyclic compound binding;GO:0036094//small molecu…	GO:0044237//cellular metabolic process;GO:0071704//organic substance metabolic process;GO:0008152//metabolic process;GO:0044260//cellular macromolecule metabolic process;GO:0044238//primary metabolic process;GO:0044267//cellular protein metabolic process;GO:0050896//response to stimulus;GO:0043170//macromolecule metabolic process;GO:0019538//protein metabolic process;GO:0006950//response to stres…
101259747	26	9	8.44	3.08	-1.45431	0.00909852	0.0377587	yes	XP_010321120.1	membrane family protein [Populus trichocarpa]	-	-	-	-	GO:0043234//protein complex;GO:0009579//thylakoid;GO:0005623//cell;GO:0034357//photosynthetic membrane;GO:0016020//membrane;GO:0044424//intracellular part;GO:0009521//photosystem;GO:0044425//membrane part;GO:0005622//intracellular;GO:0044436//thylakoid part;GO:0044464//cell part;GO:0098796//membrane protein complex;GO:0032991//macromolecular complex	-	GO:0009987//cellular process;GO:0008152//metabolic process;GO:0044237//cellular metabolic process
101259763	36	12	7.87	2.77	-1.50648	0.00110289	0.00638716	yes	XP_004243655.1	BnaA05g35380D [Brassica napus]	-	-	-	-	-	-	-
101259831	111	44	3.4	1.42	-1.25964	6.96e-07	8.13e-06	yes	XP_010319655.1	PREDICTED: centromere-associated protein E isoform X1 [Solanum lycopersicum]	-	-	-	-	GO:0044424//intracellular part;GO:0044430//cytoskeletal part;GO:0005856//cytoskeleton;GO:0043228//non-membrane-bounded organelle;GO:0043232//intracellular non-membrane-bounded organelle;GO:0043234//protein complex;GO:0044422//organelle part;GO:0043226//organelle;GO:0005875//microtubule associated complex;GO:0044446//intracellular organelle part;GO:0015630//microtubule cytoskeleton;GO:0005623//cel…	GO:0032550//purine ribonucleoside binding;GO:0016817//hydrolase activity, acting on acid anhydrides;GO:0003824//catalytic activity;GO:0016787//hydrolase activity;GO:0005488//binding;GO:0016462//pyrophosphatase activity;GO:0005515//protein binding;GO:0017111//nucleoside-triphosphatase activity;GO:0015631//tubulin binding;GO:0003774//motor activity;GO:0032549//ribonucleoside binding;GO:0001882//nuc…	GO:0044763//single-organism cellular process;GO:0044699//single-organism process;GO:0009987//cellular process;GO:0007017//microtubule-based process
101259838	114	263	16.56	40.31	1.28344	3.22e-16	1.14e-14	yes	XP_004238093.1	PREDICTED: probable strigolactone esterase DAD2 [Solanum lycopersicum]	-	-	-	-	-	GO:0003824//catalytic activity;GO:0016787//hydrolase activity;GO:0016788//hydrolase activity, acting on ester bonds	GO:0006812//cation transport;GO:0051179//localization;GO:0008299//isoprenoid biosynthetic process;GO:0008152//metabolic process;GO:0016106//sesquiterpenoid biosynthetic process;GO:0006811//ion transport;GO:1901362//organic cyclic compound biosynthetic process;GO:0019438//aromatic compound biosynthetic process;GO:1902578//single-organism localization;GO:0006810//transport;GO:0044767//single-organi…
101259856	133	61	11.36	5.5	-1.04646	1.8e-06	1.97e-05	yes	XP_004242736.1	PREDICTED: monogalactosyldiacylglycerol synthase 2, chloroplastic [Solanum lycopersicum]	Metabolism	Lipid metabolism	ko00561//Glycerolipid metabolism	K03715	-	GO:0016757//transferase activity, transferring glycosyl groups;GO:0005488//binding;GO:0016740//transferase activity;GO:0003824//catalytic activity	GO:0044763//single-organism cellular process;GO:0009987//cellular process;GO:0044710//single-organism metabolic process;GO:0006664//glycolipid metabolic process;GO:1903509//liposaccharide metabolic process;GO:0008152//metabolic process;GO:0030258//lipid modification;GO:0071704//organic substance metabolic process;GO:0044238//primary metabolic process;GO:0044699//single-organism process;GO:0006629…
[truncated: 593 more rows]

## Sheet: Table S2
Table S2. List of the different expressed genes in the +Si3 versus -Si3 group
[truncated: 1,144 more rows]

## Sheet: Table S3
Table S3.List of the different expressed genes in the +Si7 versus -Si7 group
[truncated: 4,016 more rows]

[truncated: 9 more sheets: Table S4, Table S5, Table S6, Table S7, Table S8, Table S9, Table S10, Table S11, Table S12]
